# Supplementary material for: Copper-catalyzed endo-type trifluoromethylarylation of alkynes
Source: Royal Society of Chemistry journal article supplement (doi:10.1039/c4cc05692b), 2014-09-01
Supplement: c4cc05692b1.pdf [file c4cc05692b1.pdf]

## Supporting Information

### Copper-Catalyzed Endo-type trifluoromethylarylation of Alkynes

#### *List of Contents*

|                                                                                              |     |
|----------------------------------------------------------------------------------------------|-----|
| <b>I. General Information</b> -----                                                          | S2  |
| <b>II. Preparation of Substrates</b> -----                                                   | S3  |
| <b>III. General Procedure for Copper-Catalyzed trifluoromethylarylation of Alkynes</b> ----- | S37 |
| <b>IV. Synthetic Application</b> -----                                                       | S84 |
| <b>V. Mechanistic Study</b> -----                                                            | S95 |
| <b>VI. X-ray Crystal data</b> -----                                                          | S99 |

## I. General Information

### 1. Materials:

All reagents were used as received from commercial sources unless specified otherwise, or prepared as described in the literature. DMF was purchased from ACROS, and used without further purification. **Cu powder (-100 mash, 99.999% metal base)** was purchased from Alfa Aesar. Trifluoromethyl electrophilic reagents **2a**, **2b** was purchased from Aldrich. All other reagents were purchased from commercial sources without further purification.

### 2. Analytical Methods:

<sup>1</sup>H NMR spectra were recorded on a Bruker 400 MHz spectrometer. Chemical shifts of <sup>19</sup>F NMR spectra (CFCl<sub>3</sub> as outside standard and low field is positive) were recorded with <sup>1</sup>H-coupling on a Bruker 376 MHz spectrometer. <sup>13</sup>C-NMR spectra were recorded with <sup>1</sup>H-decoupling on a Bruker 100 MHz spectrometer. Chemical shifts (δ) are reported in ppm and referenced to residual solvent peaks. Coupling constants (*J*) are reported in Hertz (Hz). The following abbreviations were used to explain the multiplicities: s = singlet, d = doublet, t = triplet, q = quartet, m = multiplet, br = broad. GC-MS analysis was performed on Thermo Scientific AS 3000 Series GC-MS System. High-resolution mass spectra (HRMS) were recorded on a BRUKER VPEXII spectrometer with EI mode unless otherwise stated. Organic solutions were concentrated under reduced pressure on a Buchi rotary evaporator. Flash column chromatographic purification of products was accomplished using forced-flow chromatography on Silica Gel (200-300 mesh). Sartorius CPA225D (Repeatability ≤ ±0.05 mg) was used to weight the catalysts and reagents.

## II. Preparation of Substrates

### 1. General Procedure A for the Synthesis of Alkynes (1) <sup>1</sup>

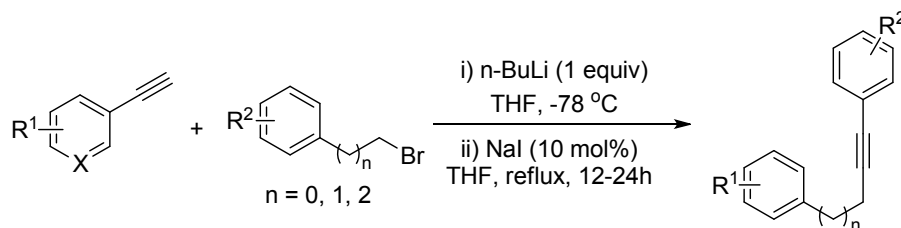

A solution of alkyne (1.0 equiv.) in tetrahydrofuran (0.25 M) was cooled to  $-78\text{ }^\circ\text{C}$  and a solution of *n*-butyllithium (1.0 equiv., 1.6 M in hexanes) was added. The reaction mixture was allowed to warm to room temperature. Sodium iodide (0.1 equiv.) and the corresponding bromoethylbenzene (1.2 equiv.) were added. The mixture was heated to reflux for the specified length of time. The reaction mixture was cooled to room temperature and quenched by addition of ammonium chloride solution. The aqueous layer was separated and extracted with diethyl ether. The combined organics were washed (brine), dried ( $\text{MgSO}_4$ ) and the solvent removed in vacuo. The crude residue was purified by flash chromatography to yield the corresponding alkyne (1).

### 2. General Procedure B for the Synthesis of Alkynes (1) <sup>1</sup>

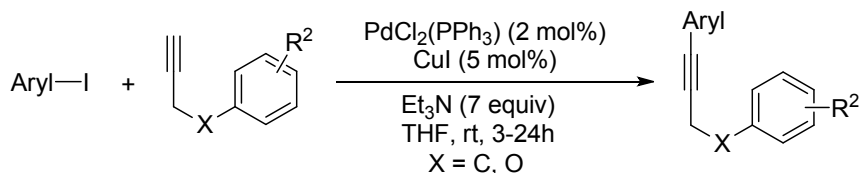

To a suspension of *trans*-dichloro-*bis*-(triphenylphosphine)palladium(II) (1-5 mol%) and copper(I) iodine (2-10 mol%) in tetrahydrofuran (0.2 M) was added the appropriate iodoarene (1.0 equiv.) and triethylamine (7.0 equiv.). The corresponding alkyne (1.1 equiv.) was added and the reaction mixture stirred at room temperature for the specified length of time. The reaction mixture was concentrated in vacuo and filtered through a plug of celite and silica, eluting with diethyl ether. The solvent was removed in vacuo and the crude residue was purified by flash chromatography to yield the corresponding alkyne (1).

### 3. Substrates Spectra data

1-methoxy-4-(4-phenylbut-1-yn-1-yl)benzene (1a)

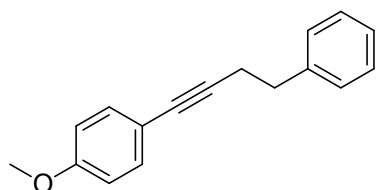

Prepared according to General Procedure A.

**<sup>1</sup>H NMR** (400 MHz, CDCl<sub>3</sub>) δ 7.36 – 7.18 (m, 7H), 6.80 (d, *J* = 8.9 Hz, 2H), 3.78 (s, 3H), 2.91 (t, *J* = 7.6 Hz, 2H), 2.67 (t, *J* = 7.6 Hz, 2H).

**<sup>13</sup>C NMR** (100 MHz, CDCl<sub>3</sub>) δ 159.09, 140.81, 132.85, 128.533, 128.355, 126.26, 116.00, 113.82, 87.87, 81.02, 55.23, 35.32, 21.69.

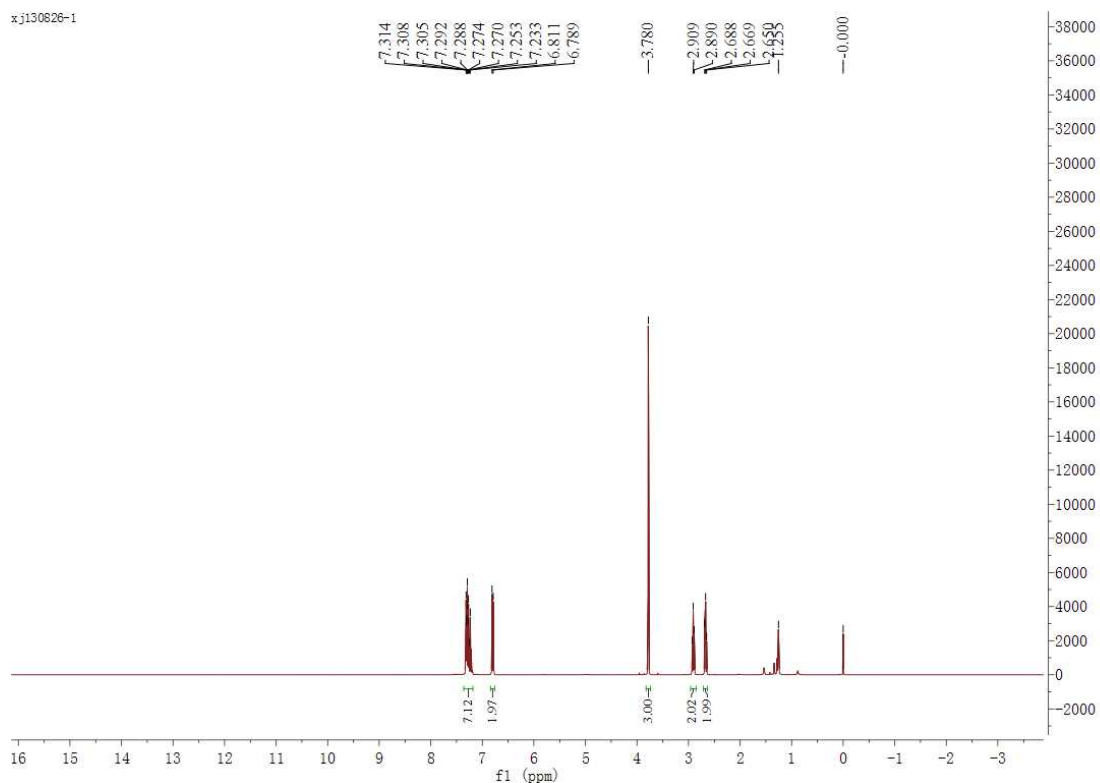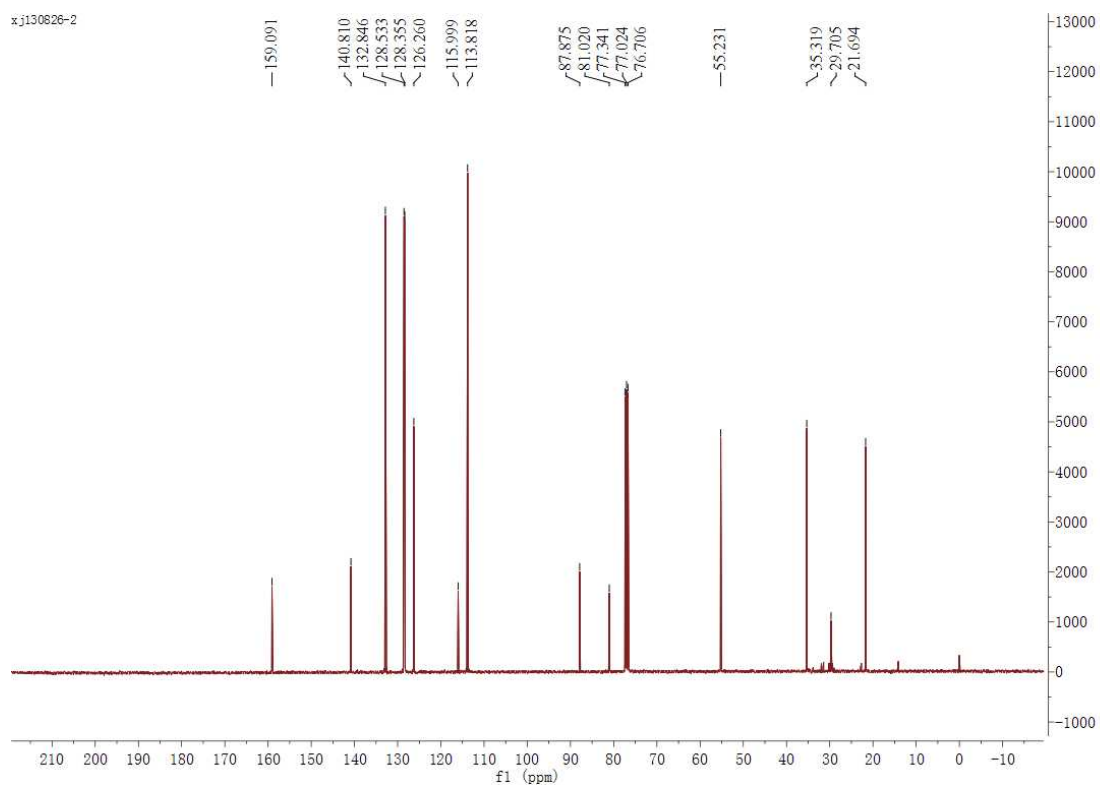

4,4'-(but-1-yne-1,4-diyl)bis(methoxybenzene) (**1b**)

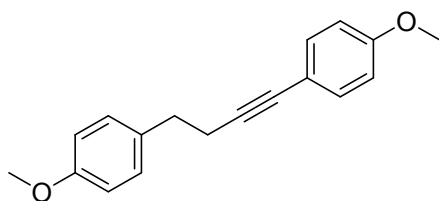

Prepared according to General Procedure A.

**<sup>1</sup>H NMR** (400 MHz, CDCl<sub>3</sub>)  $\delta$  7.31 (d,  $J$  = 8.7 Hz, 2H), 7.19 (d,  $J$  = 8.6 Hz, 2H), 6.85 (d,  $J$  = 8.6 Hz, 2H), 6.81 (d,  $J$  = 8.8 Hz, 2H), 3.79 (s, 6H), 2.85 (t,  $J$  = 7.5 Hz, 2H), 2.63 (t,  $J$  = 7.5 Hz, 2H).

**<sup>13</sup>C NMR** (100 MHz, CDCl<sub>3</sub>)  $\delta$  159.08, 158.11, 132.99, 132.85, 129.48, 116.05, 113.82, 113.77, 88.01, 80.98, 55.27, 55.25, 34.45, 22.00.

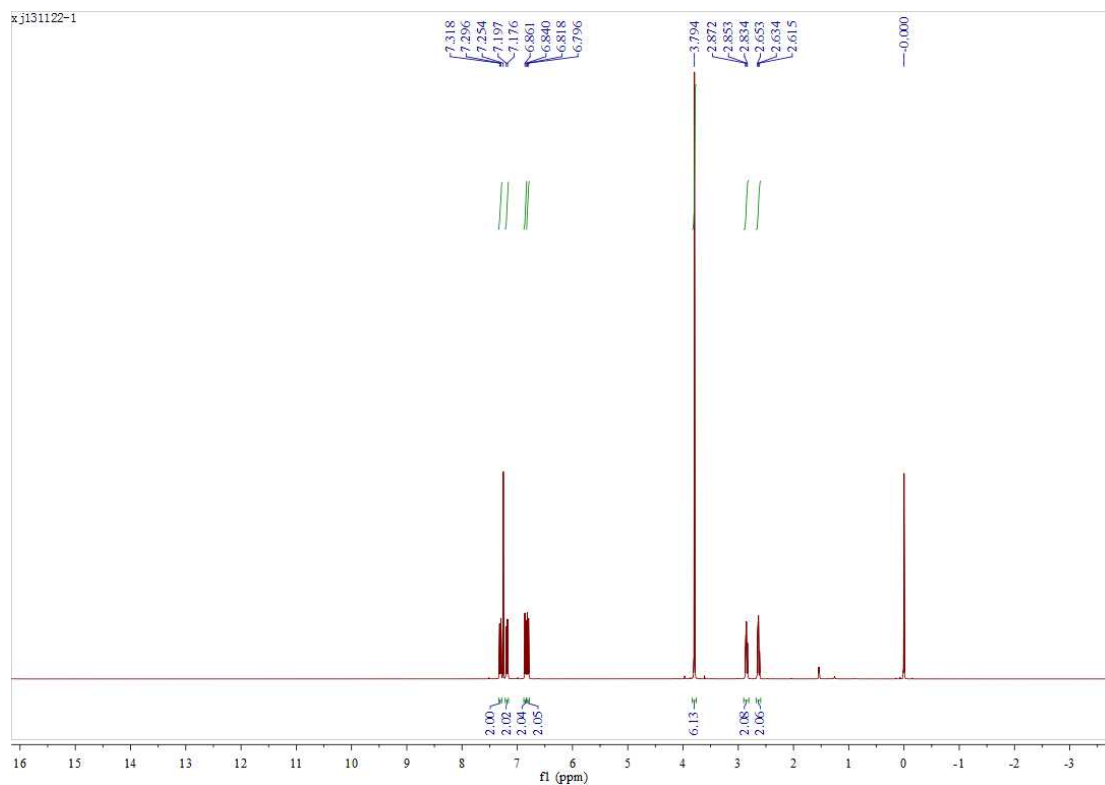

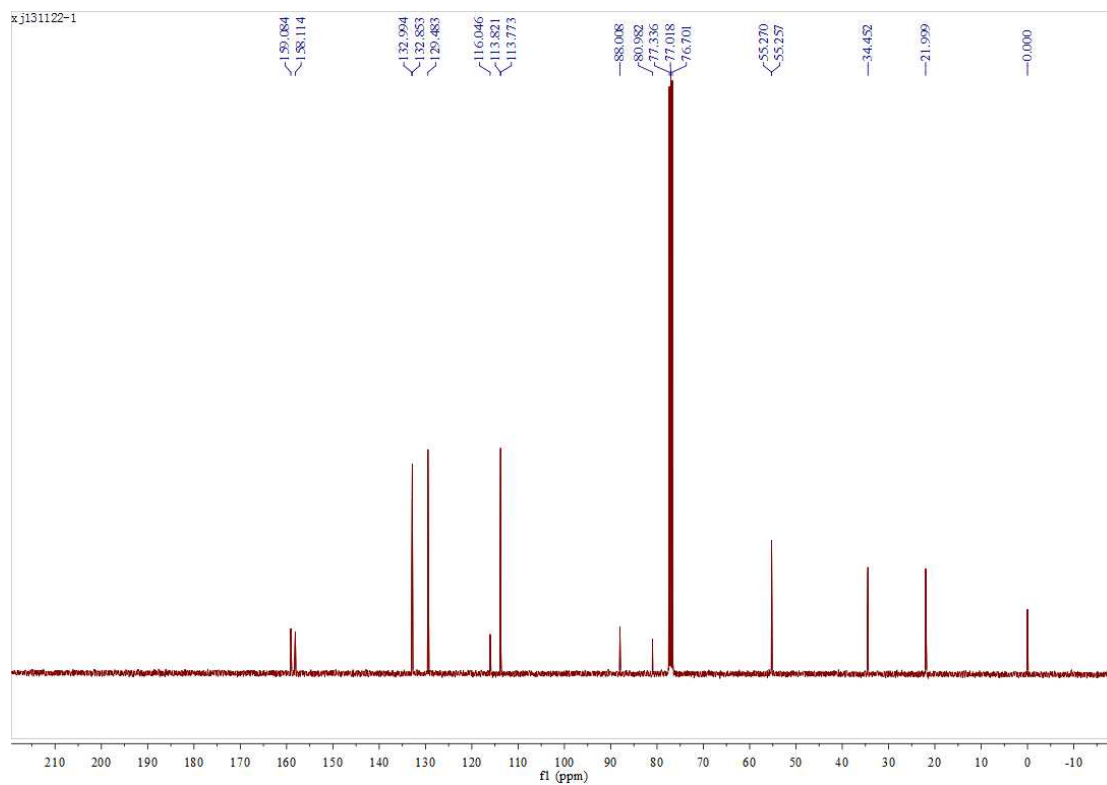

1-methoxy-4-(4-(p-tolyl)but-1-yn-1-yl)benzene (**1c**)

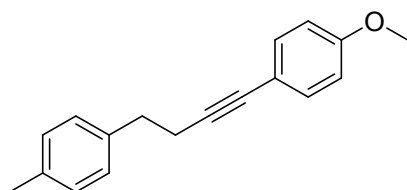

Prepared according to General Procedure **A**.

**<sup>1</sup>H NMR** (400 MHz, CDCl<sub>3</sub>) δ 7.35 – 7.28 (d, *J* = 8.8 Hz, 2H), 7.14 (dd, *J* = 18.1, 8.0 Hz, 4H), 6.84 – 6.78 (d, *J* = 8.8 Hz, 2H), 3.80 (s, 3H), 2.88 (t, *J* = 7.6 Hz, 2H), 2.65 (t, *J* = 7.6 Hz, 2H), 2.33 (s, 3H).

**<sup>13</sup>C NMR** (100 MHz, CDCl<sub>3</sub>) δ 159.08, 137.80, 135.76, 132.87, 129.06, 128.42, 116.04, 113.82, 88.04, 80.91, 55.27, 34.93, 21.88, 21.07.

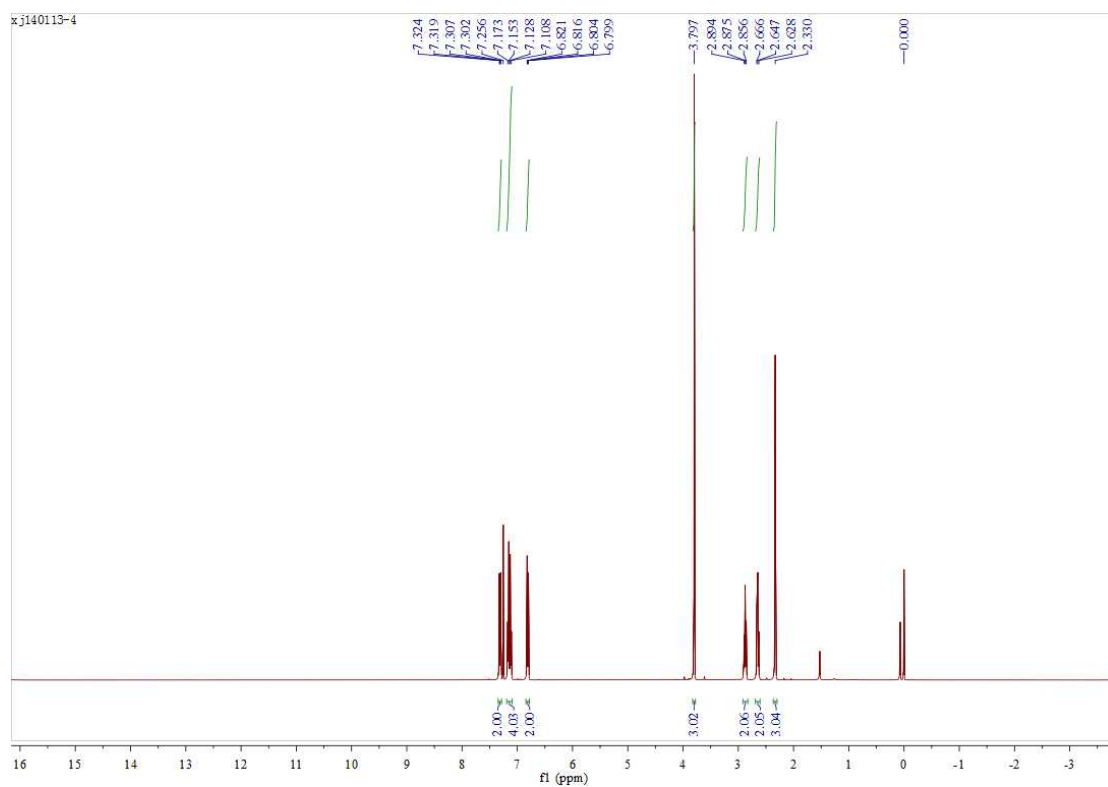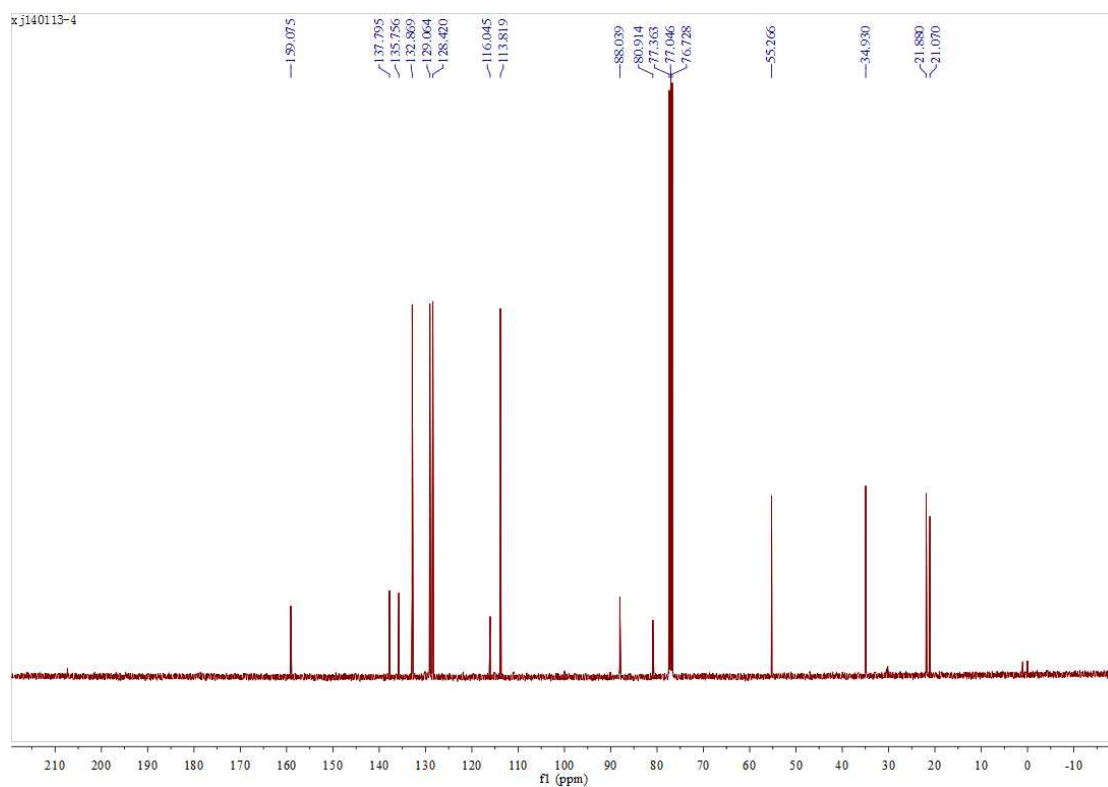

5-(4-(4-methoxyphenyl)but-3-yn-1-yl)-2,3-dihydrobenzofuran (**1d**)

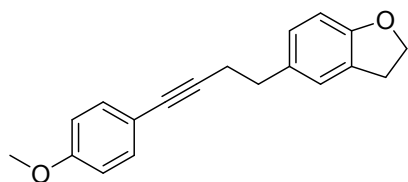

Prepared according to General Procedure A.

**<sup>1</sup>H NMR** (400 MHz, CDCl<sub>3</sub>) δ 7.36 – 7.27 (m, 2H), 7.10 (s, 1H), 7.00 (d, *J* = 8.1 Hz, 1H), 6.87 – 6.77 (m, 2H), 6.73 (d, *J* = 8.1 Hz, 1H), 4.55 (t, *J* = 8.7 Hz, 2H), 3.80 (s, 3H), 3.19 (t, *J* = 8.7 Hz, 2H), 2.84 (t, *J* = 7.5 Hz, 2H), 2.62 (t, *J* = 7.5 Hz, 2H).

**<sup>13</sup>C NMR** (100 MHz, CDCl<sub>3</sub>) δ 159.07, 158.60, 132.90, 132.86, 128.03, 126.99, 125.07, 116.03, 113.82, 108.96, 88.09, 80.99, 71.20, 55.27, 34.80, 29.83, 22.28.

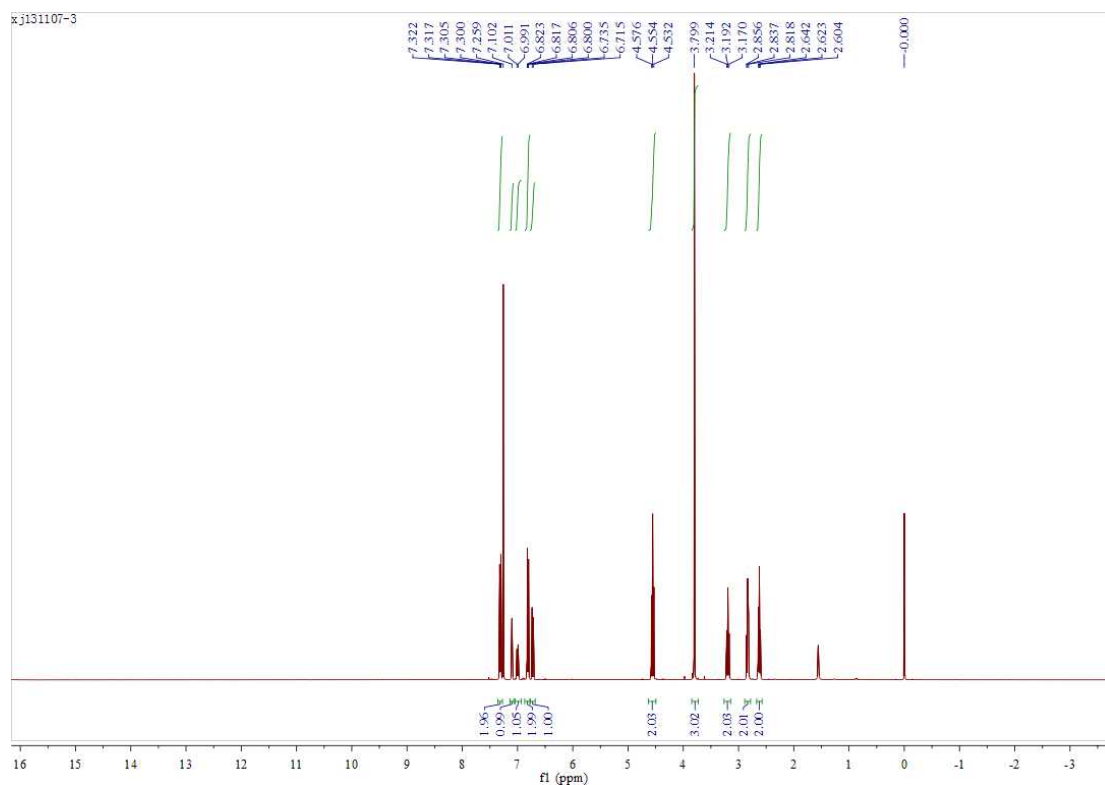



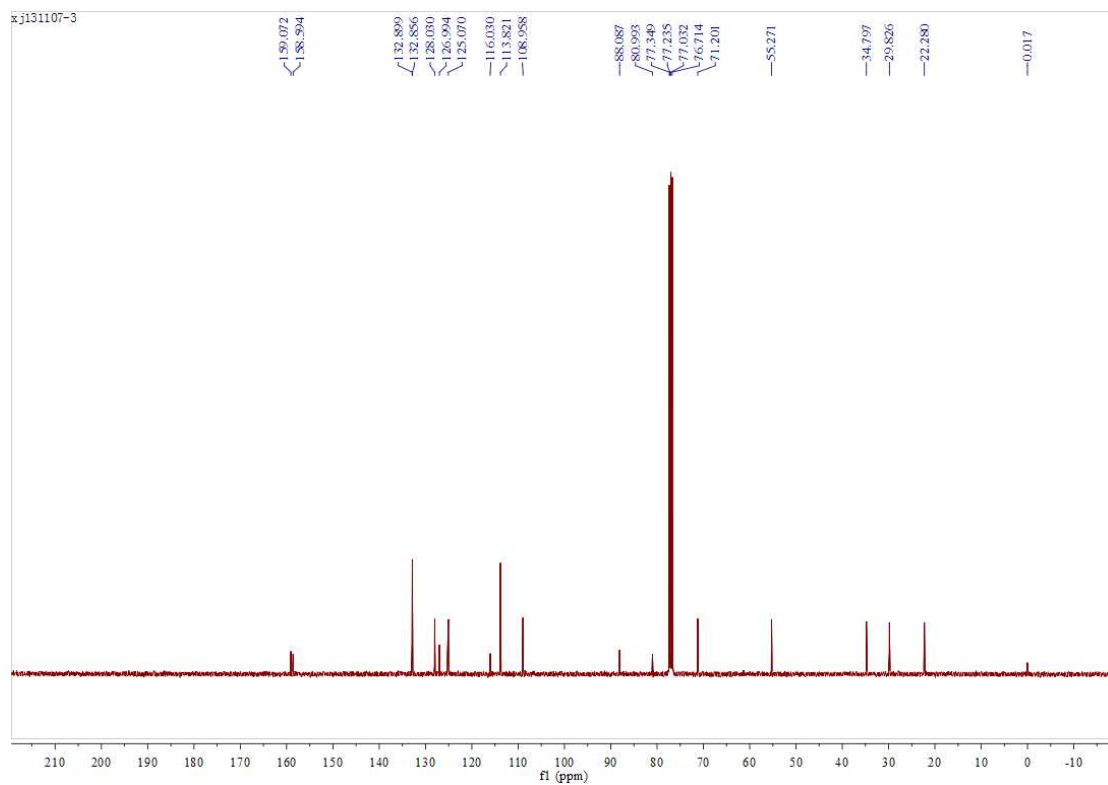

1-fluoro-4-(4-(4-methoxyphenyl)but-3-yn-1-yl)benzene (**1e**)

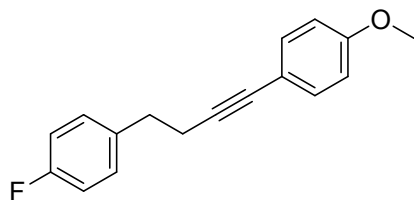

Prepared according to General Procedure A.

**<sup>1</sup>H NMR** (400 MHz, CDCl<sub>3</sub>)  $\delta$  7.32 – 7.26 (d,  $J$  = 8 Hz, 2H), 7.25 – 7.19 (m, 2H), 6.99 (t,  $J$  = 8 Hz, 2H), 6.81 (d,  $J$  = 8 Hz, 2H), 3.80 (s, 3H), 2.88 (t,  $J$  = 7.4 Hz, 2H), 2.65 (t,  $J$  = 7.4 Hz, 2H).

**<sup>13</sup>C NMR** (100 MHz, CDCl<sub>3</sub>)  $\delta$  161.52 (d,  $J$  = 242 Hz), 159.16, 136.42 (d,  $J$  = 4 Hz), 132.84, 129.97 (d,  $J$  = 8 Hz), 115.88, 115.08 (d,  $J$  = 21 Hz), 113.86, 87.53, 81.29, 55.26, 34.43, 21.81.

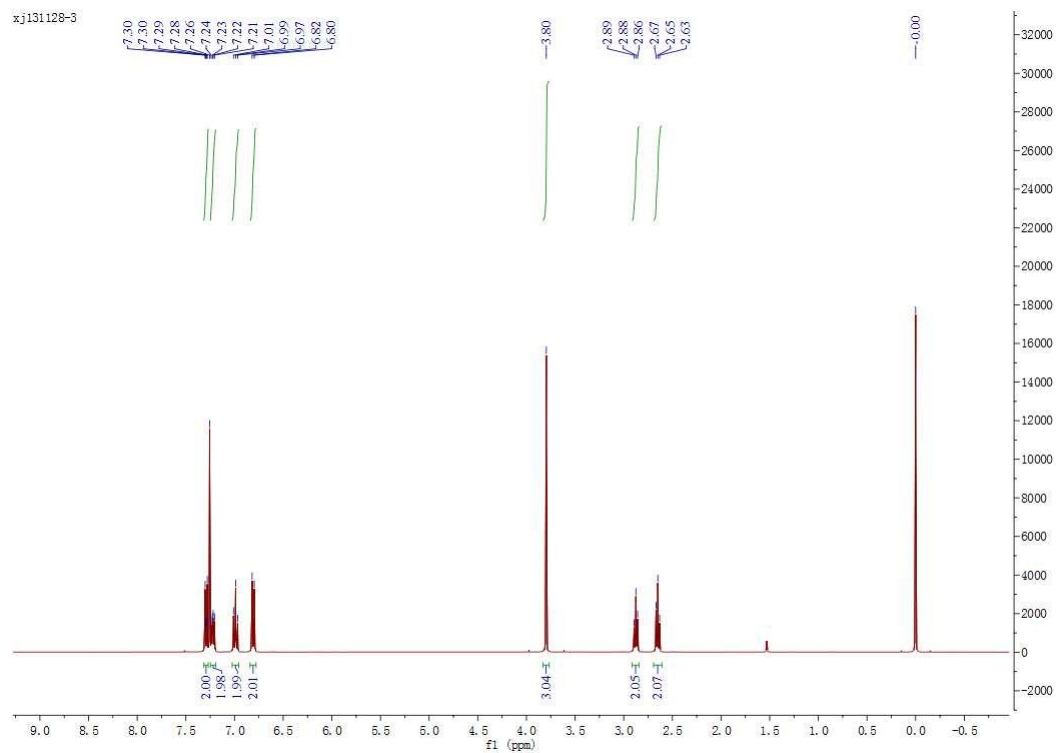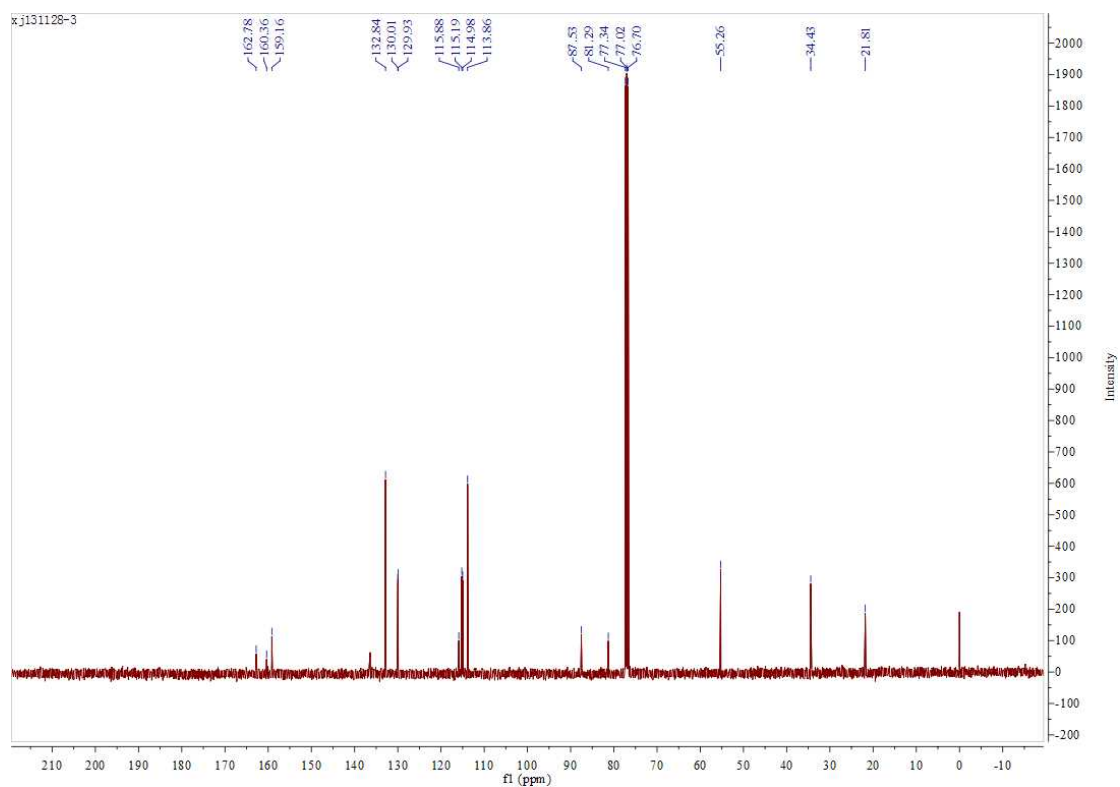

1-chloro-4-(4-(4-methoxyphenyl)but-3-yn-1-yl)benzene (**1f**)

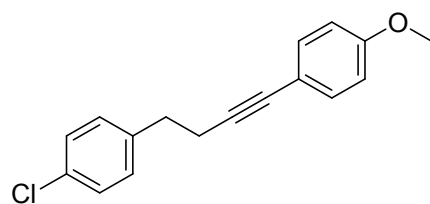

Prepared according to General Procedure A.

**<sup>1</sup>H NMR** (400 MHz, CDCl<sub>3</sub>) δ 7.28 (dd, *J* = 8.3, 7.1 Hz, 4H), 7.20 (d, *J* = 8.4 Hz, 2H), 6.81 (d, *J* = 8.7 Hz, 2H), 3.79 (s, 3H), 2.87 (t, *J* = 7.3 Hz, 2H), 2.65 (t, *J* = 7.3 Hz, 2H).

**<sup>13</sup>C NMR** (100 MHz, CDCl<sub>3</sub>) δ 159.17, 139.19, 132.84, 132.06, 129.95, 128.44, 115.82, 113.86, 87.36, 81.37, 55.26, 34.56, 21.58.

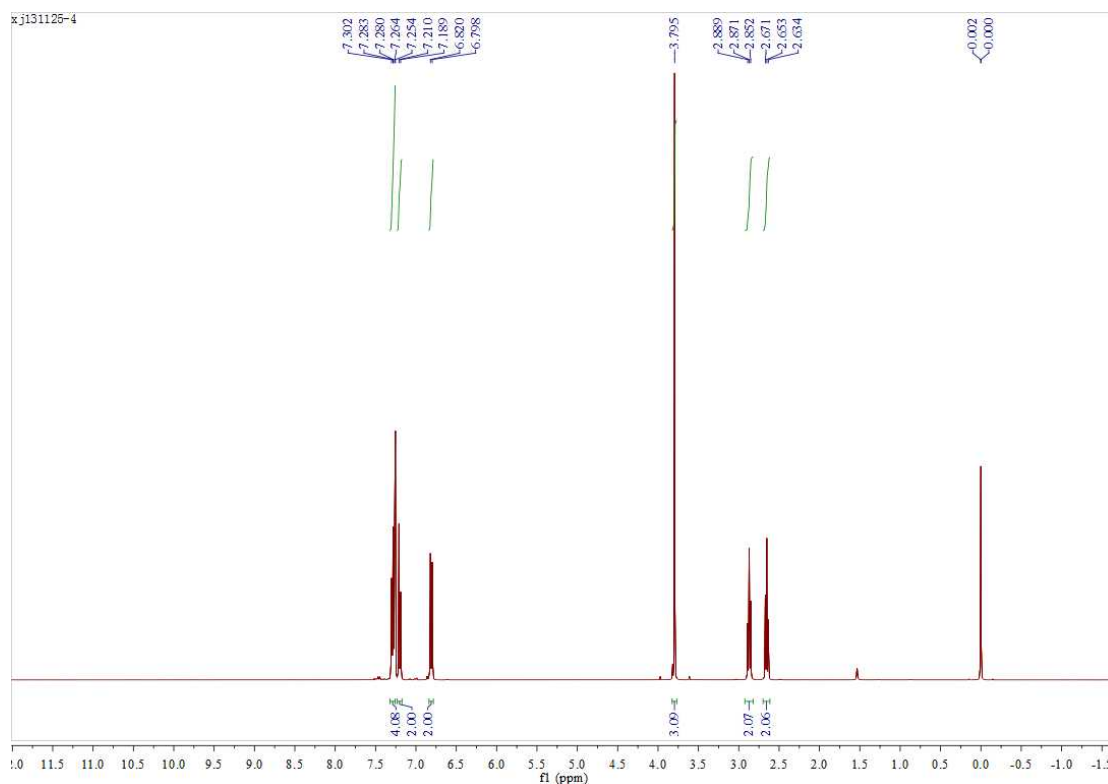

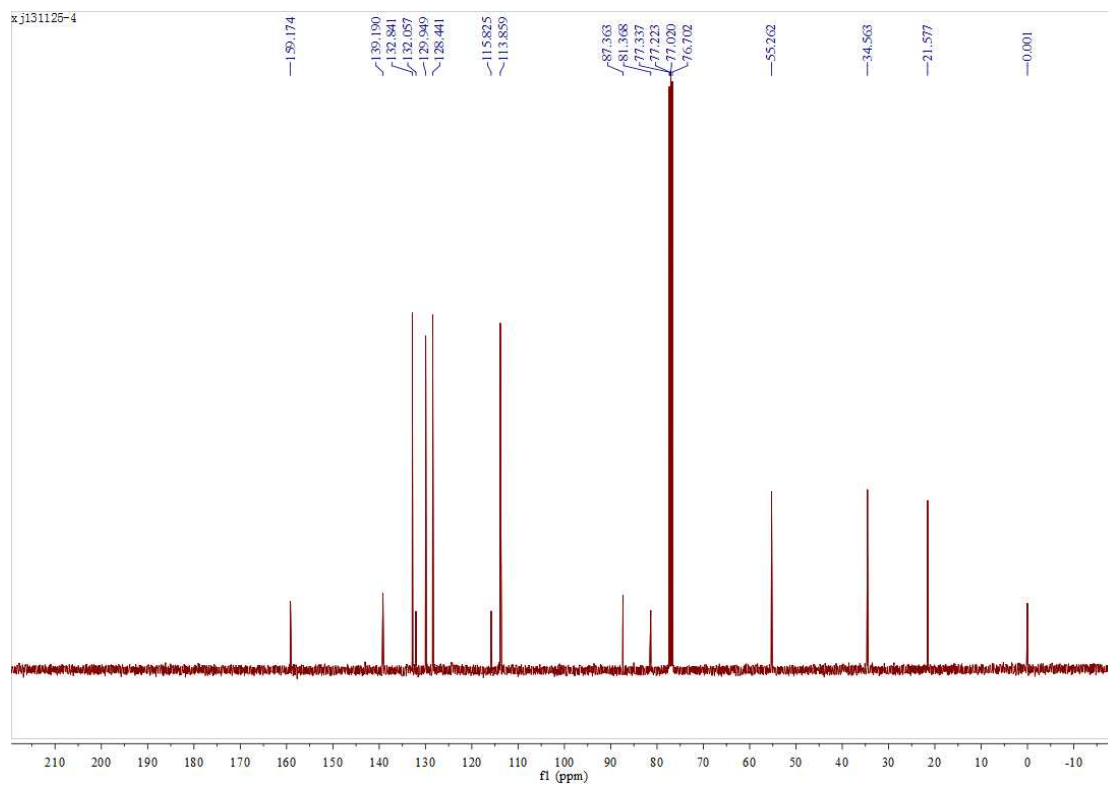

1-chloro-2-(4-(4-methoxyphenyl)but-3-yn-1-yl)benzene (**1g**)

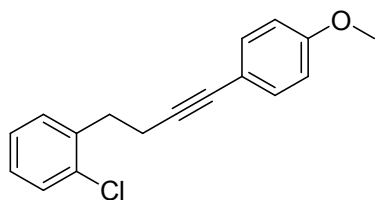

Prepared according to General Procedure A.

**<sup>1</sup>H NMR** (400 MHz, CDCl<sub>3</sub>) δ 7.40 – 7.27 (m, 4H), 7.24 – 7.14 (m, 2H), 6.81 (d, *J* = 9.2 Hz, 2H), 3.80 (s, 3H), 3.04 (t, *J* = 7.4 Hz, 2H), 2.71 (t, *J* = 7.5 Hz, 2H).

**<sup>13</sup>C NMR** (100 MHz, CDCl<sub>3</sub>) δ 159.10, 138.16, 133.96, 132.86, 130.86, 129.47, 127.83, 126.69, 115.90, 113.81, 87.45, 81.17, 55.25, 33.03, 19.75.

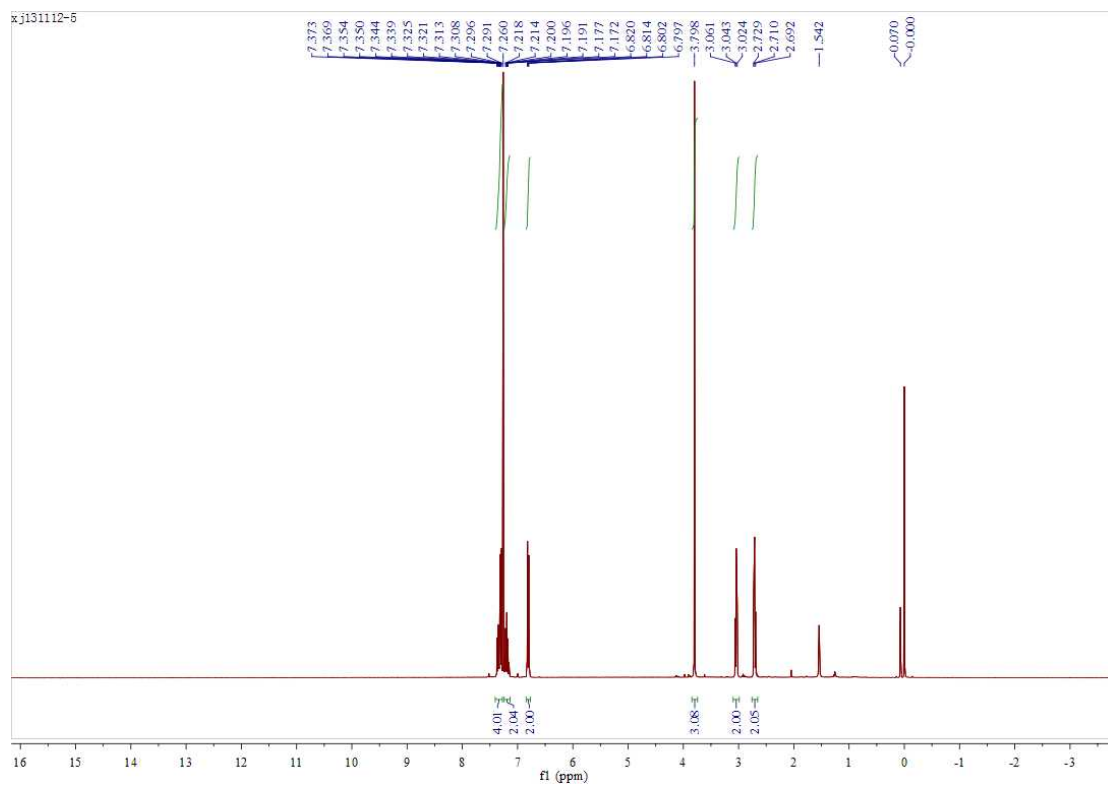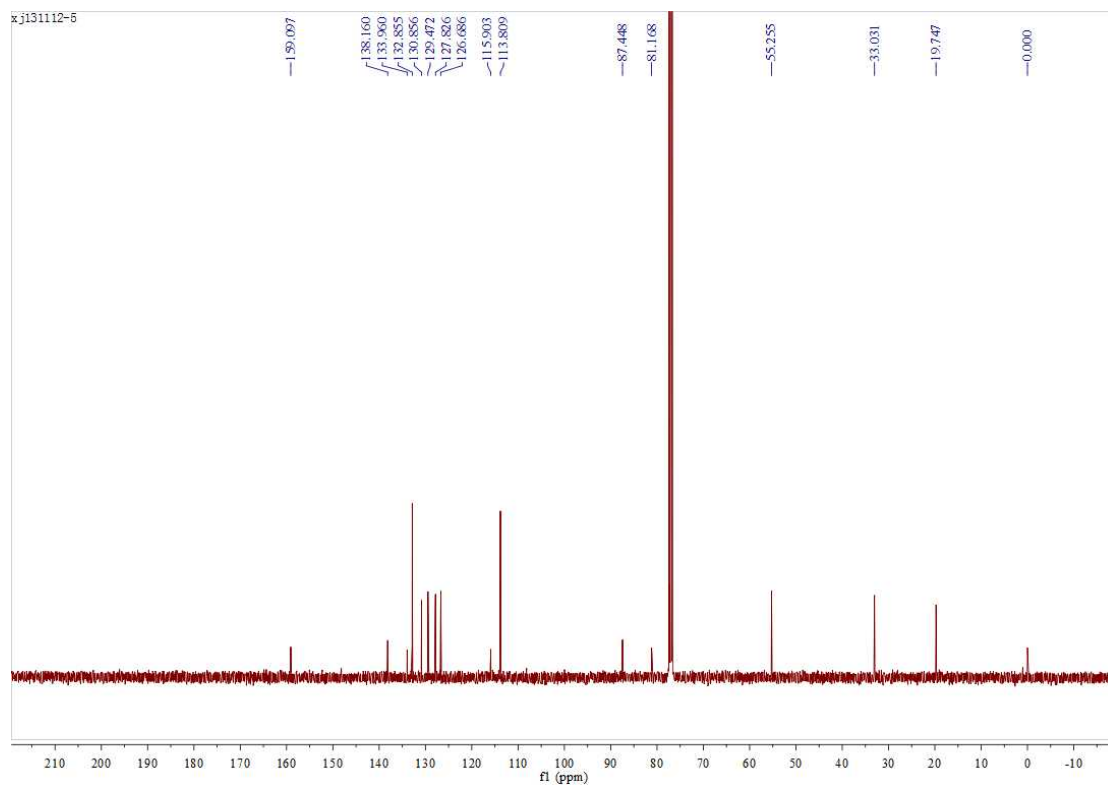

1-bromo-3-(4-(4-methoxyphenyl)but-3-yn-1-yl)benzene (**1h**)

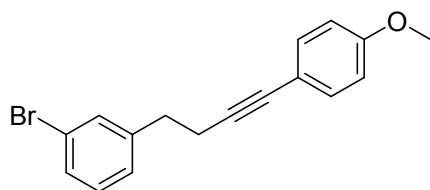

Prepared according to General Procedure A.

**<sup>1</sup>H NMR** (400 MHz, CDCl<sub>3</sub>) δ 7.38 (s, 1H), 7.29 (d, *J* = 6.8 Hz, 1H), 7.23 (d, *J* = 8.4 Hz, 2H), 7.15 – 7.07 (m, 2H), 6.74 (d, *J* = 8.8 Hz, 2H), 3.73 (s, 3H), 2.80 (t, *J* = 7.3 Hz, 2H), 2.59 (t, *J* = 7.3 Hz, 2H).

**<sup>13</sup>C NMR** (100 MHz, CDCl<sub>3</sub>) δ 158.13, 141.99, 131.84, 130.72, 128.88, 128.38, 126.23, 121.30, 114.73, 112.81, 86.18, 80.49, 54.23, 33.78, 20.47.

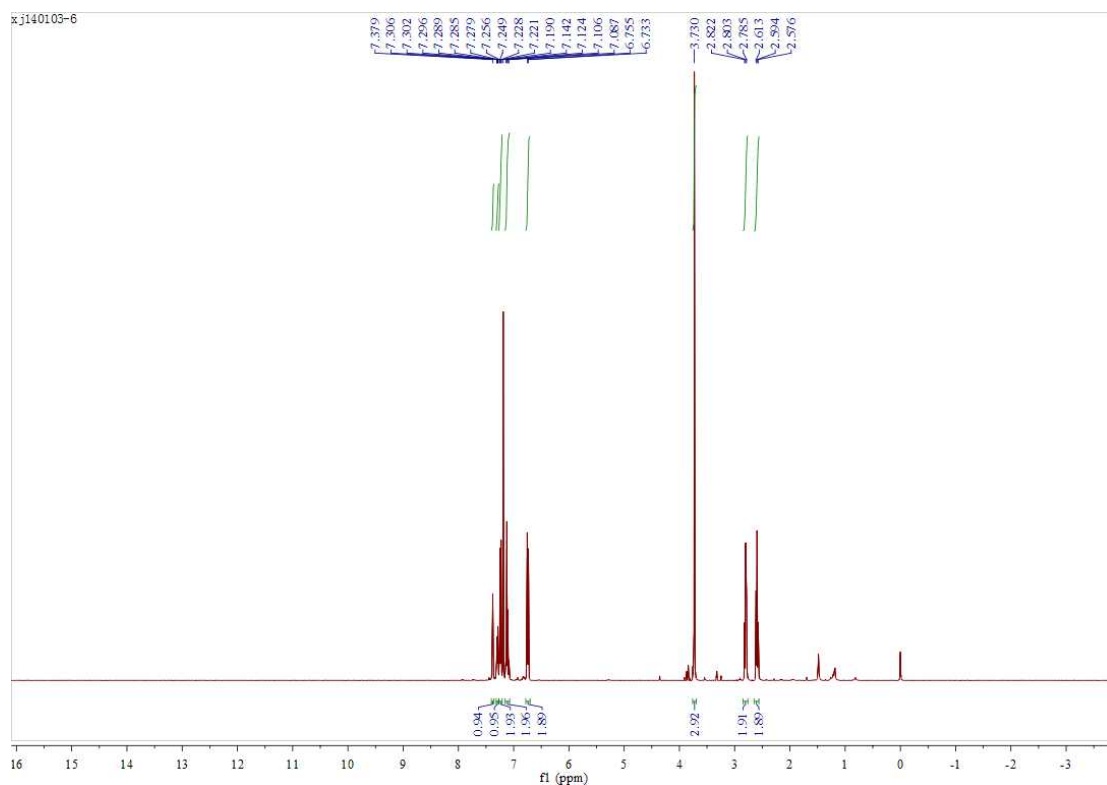

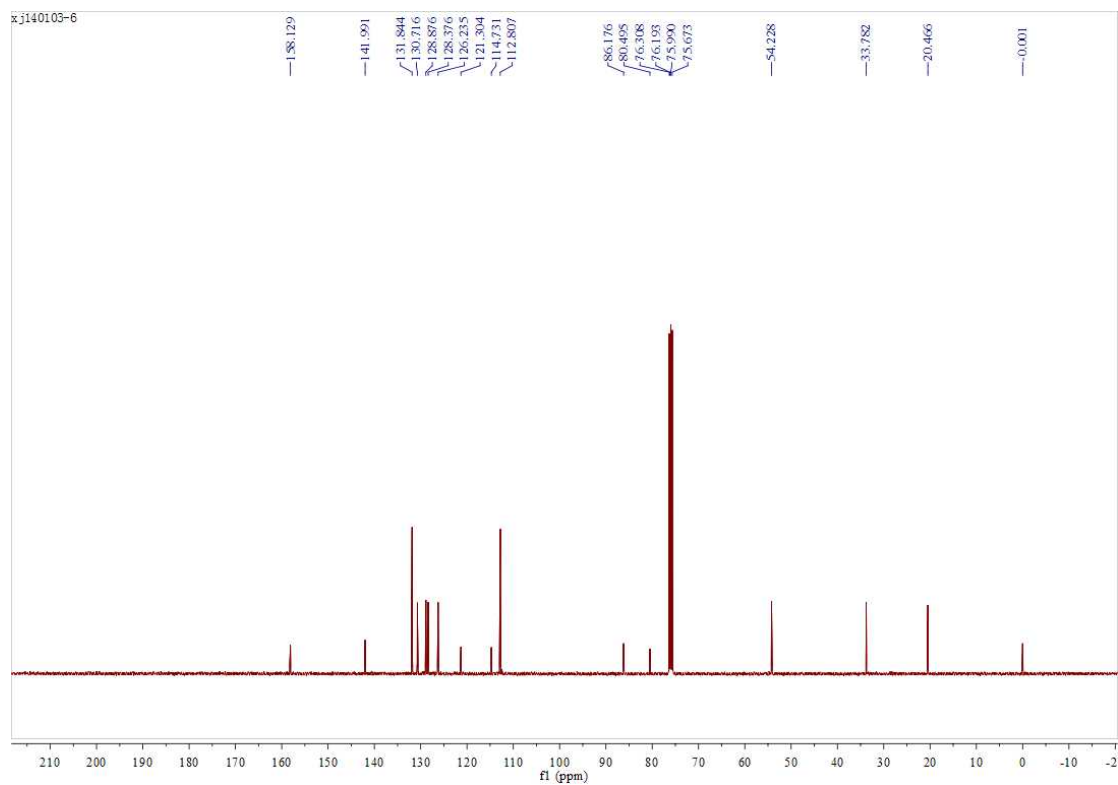

1-bromo-4-(4-(4-methoxyphenyl)but-3-yn-1-yl)benzene (**1i**)

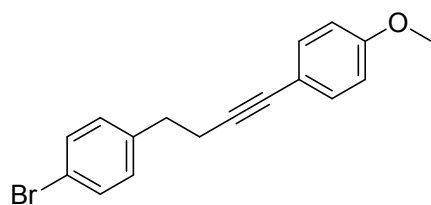

Prepared according to General Procedure A.

<sup>1</sup>H NMR (400 MHz, CDCl<sub>3</sub>) δ 7.43 (d, *J* = 8.3 Hz, 2H), 7.30 (d, *J* = 8.8 Hz, 2H), 7.15 (d, *J* = 8.3 Hz, 2H), 6.81 (d, *J* = 8.8 Hz, 2H), 3.80 (s, 3H), 2.86 (t, *J* = 7.8 Hz, 2H), 2.65 (t, *J* = 7.8 Hz, 2H).

<sup>13</sup>C NMR (100 MHz, CDCl<sub>3</sub>) δ 158.11, 138.66, 131.80, 130.35, 129.33, 119.07, 114.73, 112.81, 86.29, 80.33, 54.23, 33.57, 20.48.

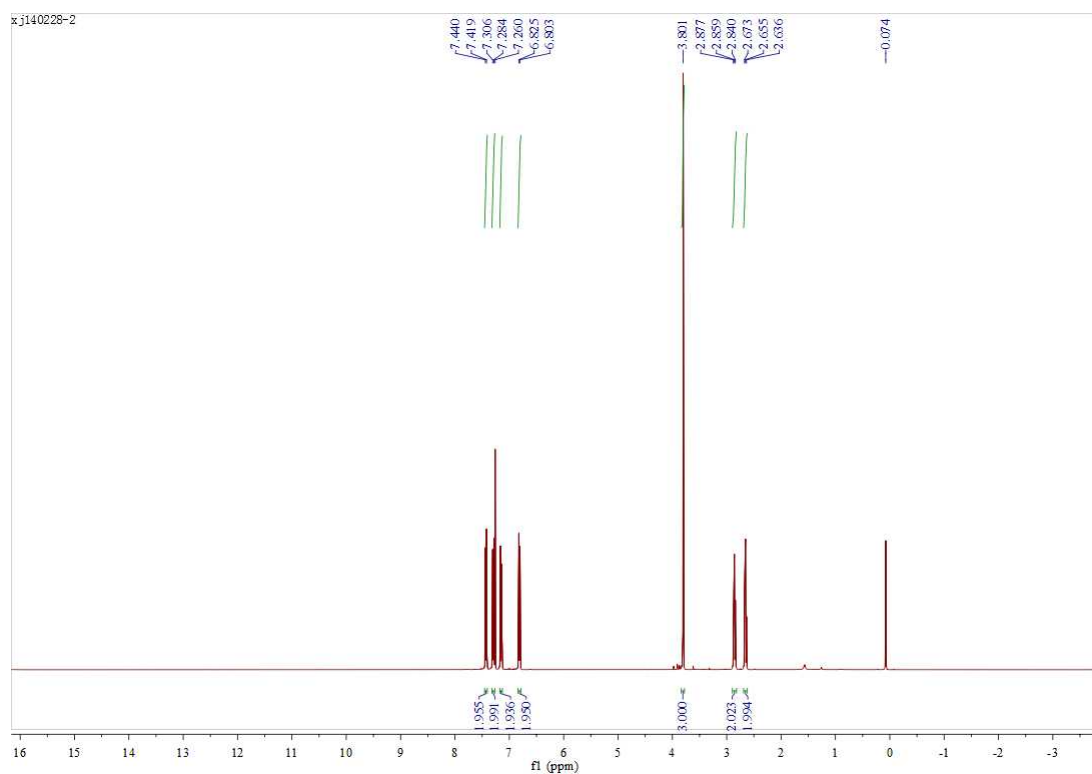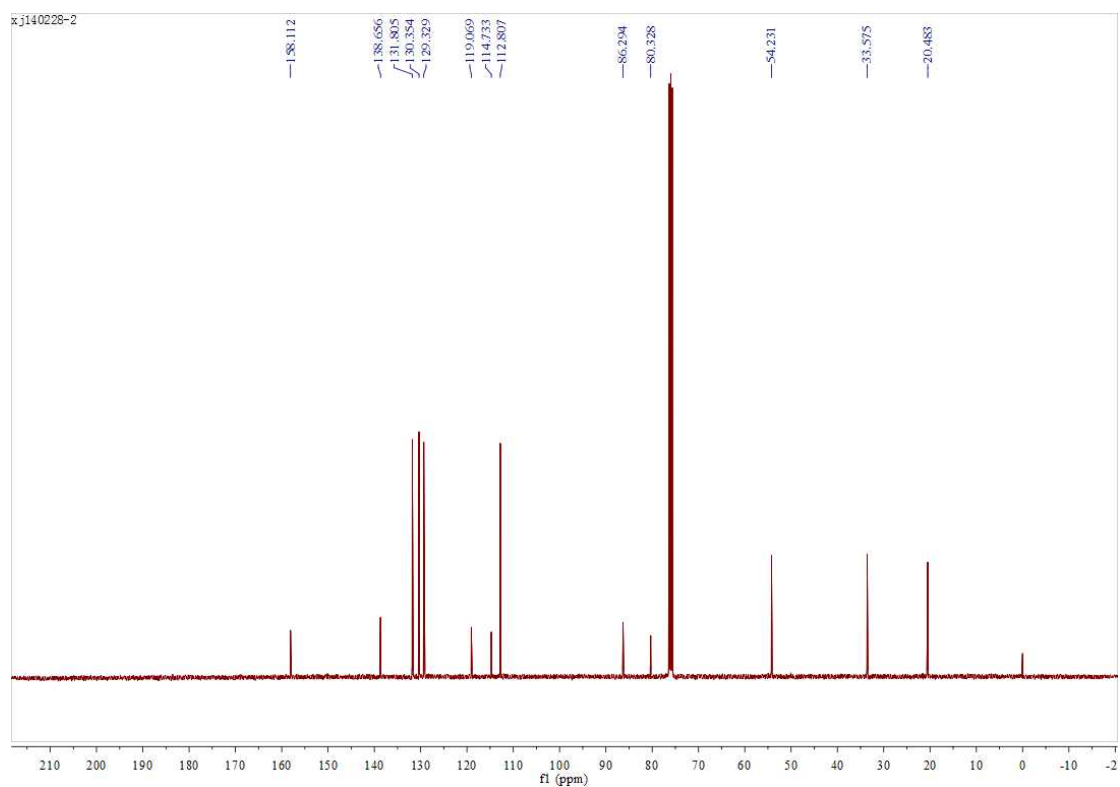



1-methoxy-4-(4-(4-(trifluoromethyl)phenyl)but-1-yn-1-yl)benzene (**1j**)

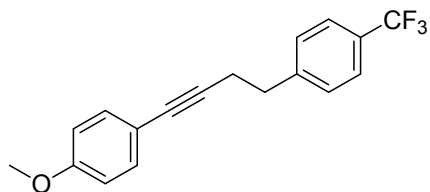

Prepared according to General Procedure **B**.

**<sup>1</sup>H NMR** (400 MHz, CDCl<sub>3</sub>) δ 7.57 (d, *J* = 8.1 Hz, 2H), 7.39 (d, *J* = 8.0 Hz, 2H), 7.28 (d, *J* = 8.8 Hz, 2H), 6.81 (d, *J* = 8.8 Hz, 2H), 3.80 (s, 3H), 2.96 (t, *J* = 7.3 Hz, 2H), 2.70 (t, *J* = 7.3 Hz, 2H).

**<sup>13</sup>C NMR** (100 MHz, CDCl<sub>3</sub>) δ 159.23, 144.76, 132.84, 128.93, 128.68 (q, *J* = 32 Hz), 125.28 (q, *J* = 3 Hz), 124.33 (q, *J* = 271 Hz), 115.72, 113.88, 87.06, 81.55, 55.27, 34.99, 21.33.

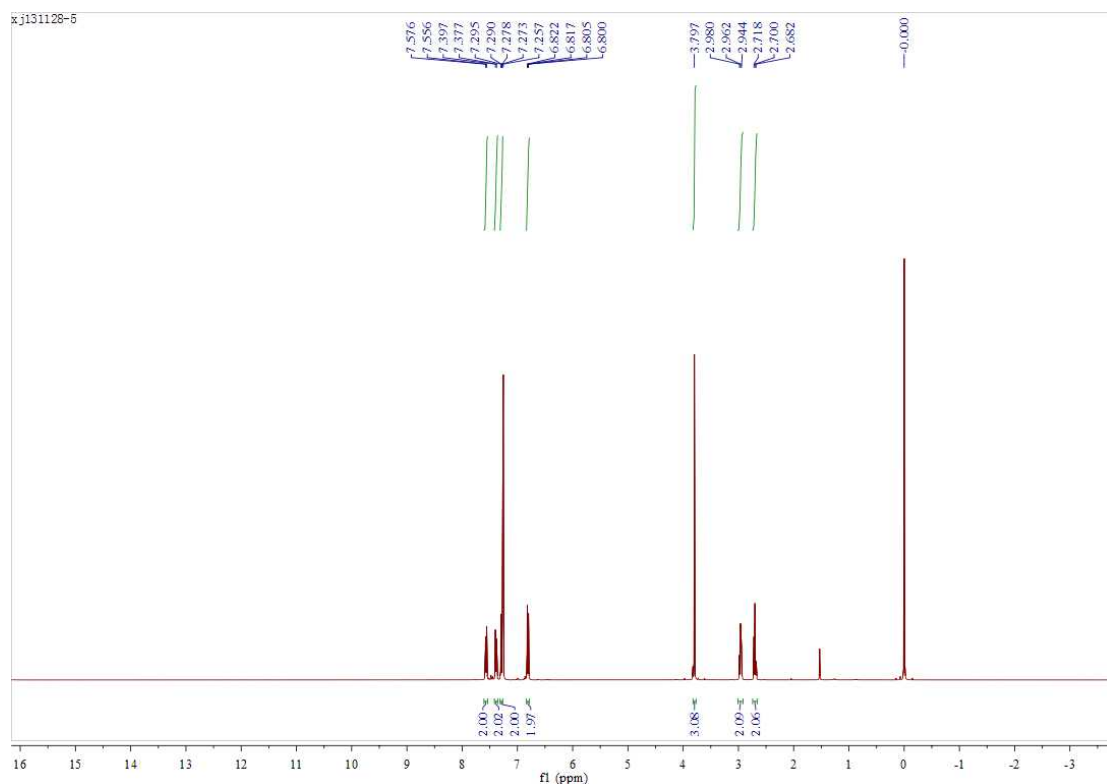

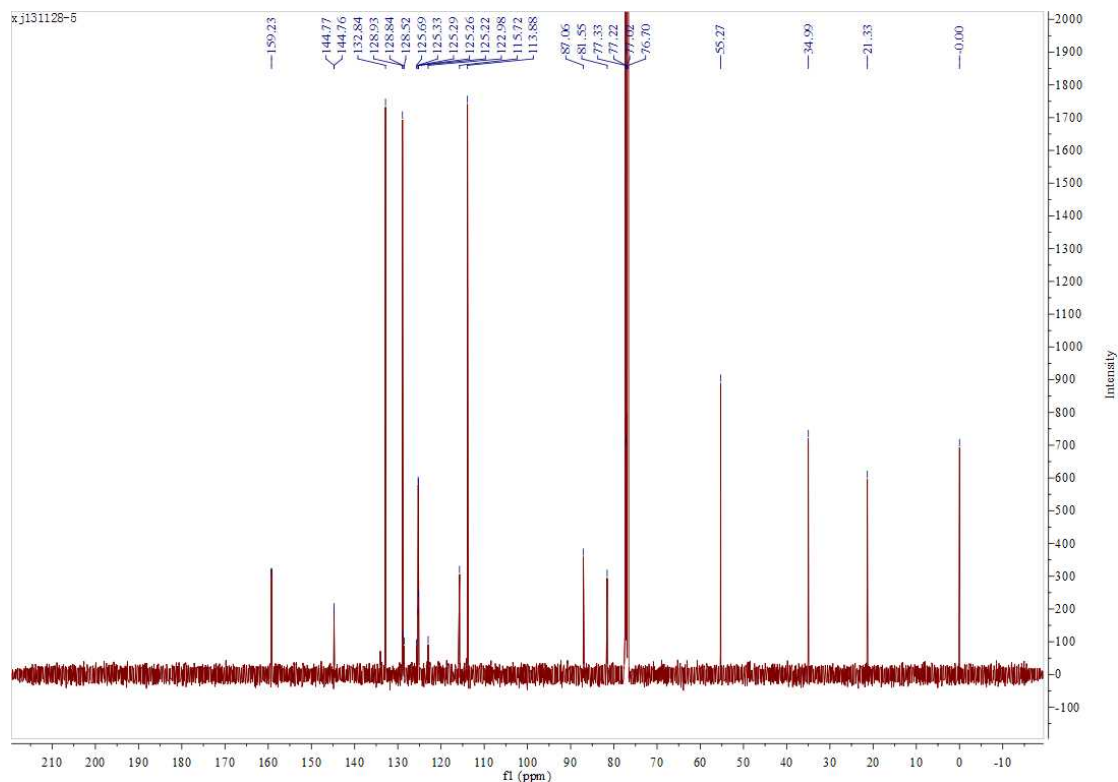

1-(4-(4-methoxyphenyl)but-3-yn-1-yl)-3-(trifluoromethyl)benzene (**1k**)

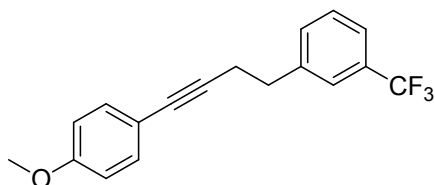

Prepared according to General Procedure **B**.

**<sup>1</sup>H NMR** (400 MHz, CDCl<sub>3</sub>) δ 7.55 (s, 1H), 7.53 – 7.38 (m, 3H), 7.29 (d, *J* = 8.8 Hz, 2H), 6.80 (d, *J* = 8.8 Hz, 2H), 3.78 (s, 3H), 2.95 (t, *J* = 7.2 Hz, 2H), 2.69 (t, *J* = 7.3 Hz, 2H).

**<sup>13</sup>C NMR** (100 MHz, CDCl<sub>3</sub>) δ 158.16, 140.53, 131.80, 131.01, 129.55 (q, *J* = 31 Hz), 127.72, 124.41 (q, *J* = 4 Hz), 123.23 (q, *J* = 270 Hz), 122.16 (q, *J* = 4 Hz), 114.66, 112.81, 85.96, 80.65, 54.20, 33.87, 20.44.

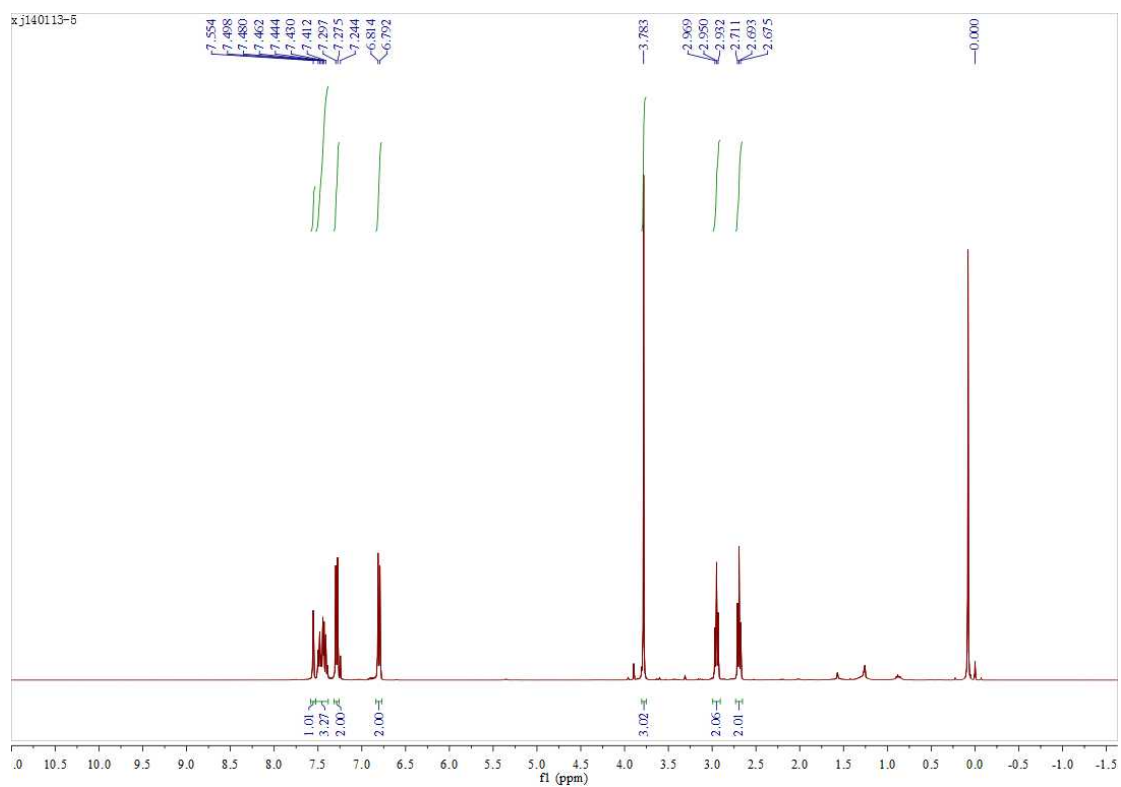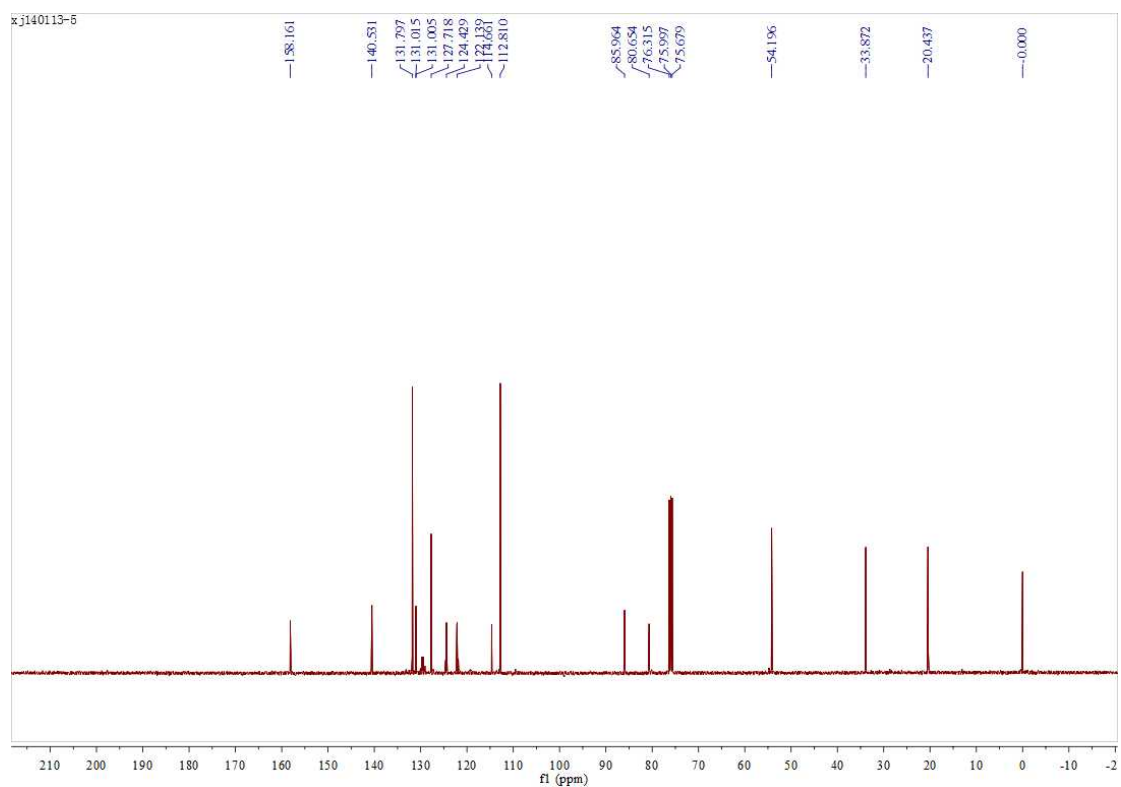

1-methoxy-4-(3-phenoxyprop-1-yn-1-yl)benzene (**11**)

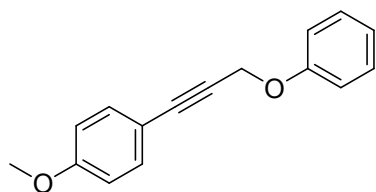

Prepared according to General Procedure **B**.

**<sup>1</sup>H NMR** (400 MHz, CDCl<sub>3</sub>) δ 7.38 (d, *J* = 8.8 Hz, 2H), 7.32 (t, *J* = 8.7 Hz, 2H), 7.03 (d, *J* = 8.7 Hz, 2H), 6.99 (t, *J* = 7.8 Hz, 1H), 6.83 (d, *J* = 8.8 Hz, 2H), 4.90 (s, 2H), 3.80 (s, 3H).

**<sup>13</sup>C NMR** (100 MHz, CDCl<sub>3</sub>) δ 159.88, 157.86, 133.36, 129.47, 121.36, 114.98, 114.37, 113.91, 87.12, 82.56, 56.73, 55.30.

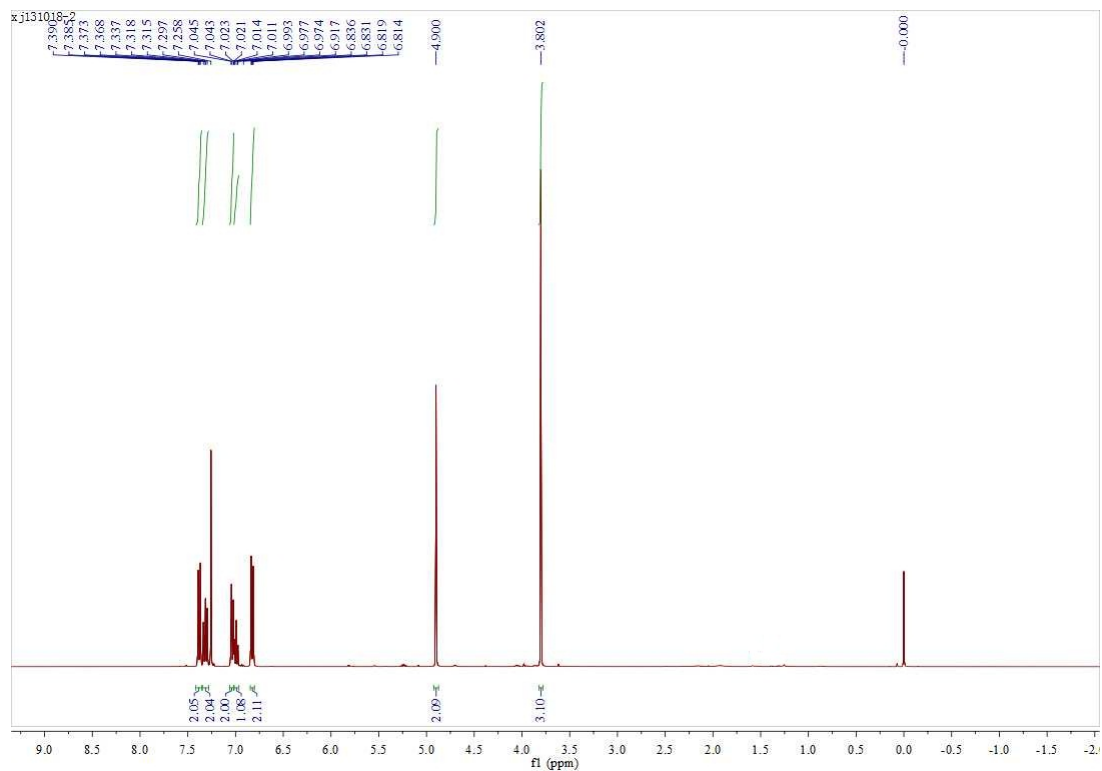

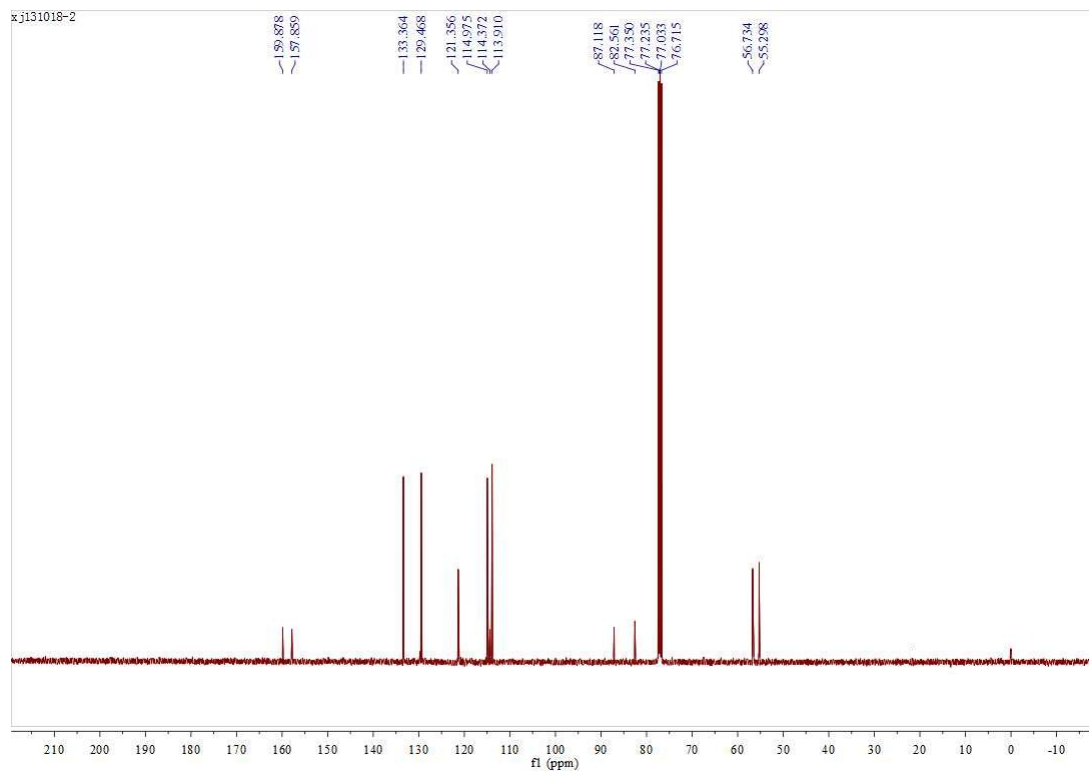

1-methoxy-4-(3-(4-methoxyphenoxy)prop-1-yn-1-yl)benzene (**1m**)

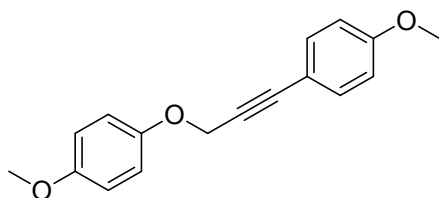

Prepared according to General Procedure **B**.

<sup>1</sup>H NMR (400 MHz, CDCl<sub>3</sub>) δ 7.38 (d, *J* = 8.9 Hz, 2H), 6.98 (d, *J* = 9.1 Hz, 2H), 6.86 (d, *J* = 9.2 Hz, 2H), 6.82 (d, *J* = 9.2 Hz, 2H), 4.84 (s, 2H), 3.81 (s, 3H), 3.78 (s, 3H).

<sup>13</sup>C NMR (100 MHz, CDCl<sub>3</sub>) δ 159.85, 154.34, 152.01, 133.34, 116.22, 114.60, 114.43, 113.90, 86.99, 82.83, 57.62, 55.71, 55.30.

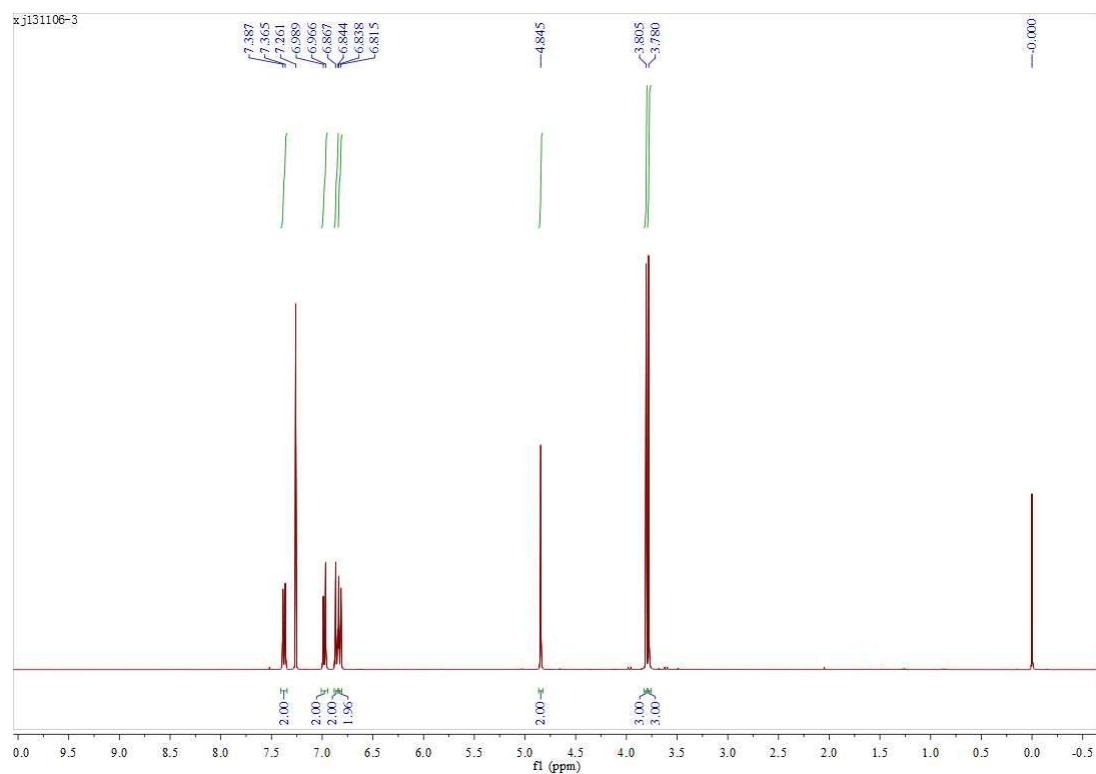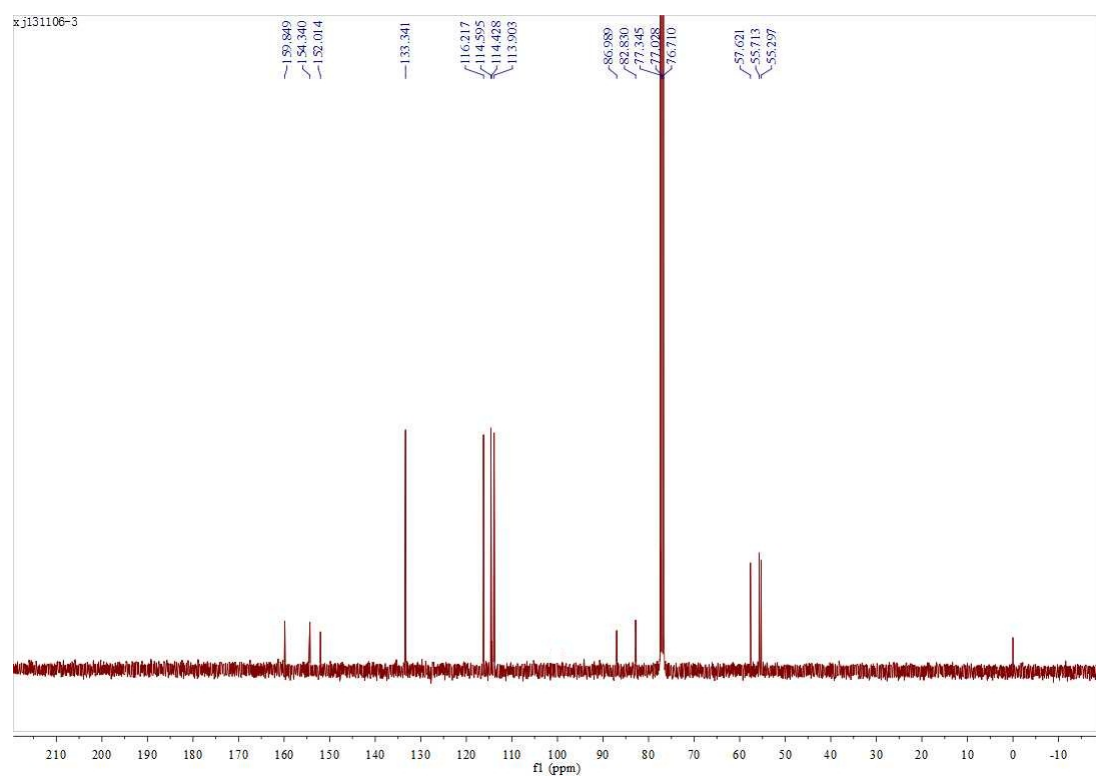

1-methoxy-3-((3-(4-methoxyphenyl)prop-2-yn-1-yl)oxy)benzene (**1n**)

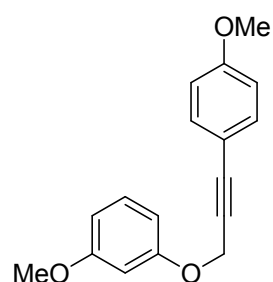

Prepared according to General Procedure **B**.

$^1\text{H}$  NMR (400 MHz,  $\text{CDCl}_3$ )  $\delta$  7.38 (d,  $J = 8.1$  Hz, 2H), 7.21 (t,  $J = 8.2$  Hz, 1H), 6.83 (d,  $J = 8.1$  Hz, 2H), 6.65 – 6.53 (m, 3H), 4.88 (s, 2H), 3.80 (d,  $J = 1.9$  Hz, 6H).

$^{13}\text{C}$  NMR (101 MHz,  $\text{CDCl}_3$ )  $\delta$  160.79, 159.88, 159.11, 133.36, 129.87, 114.35, 113.90, 107.03, 106.97, 101.46, 87.15, 82.46, 56.83, 55.30, 55.28.

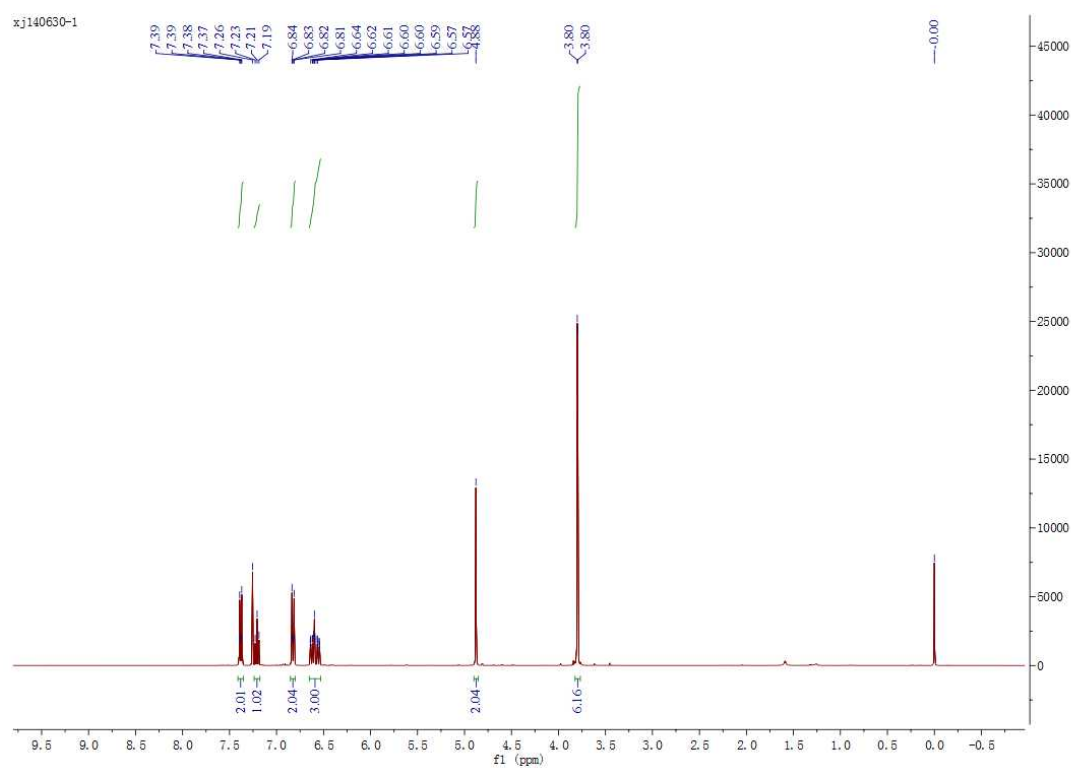

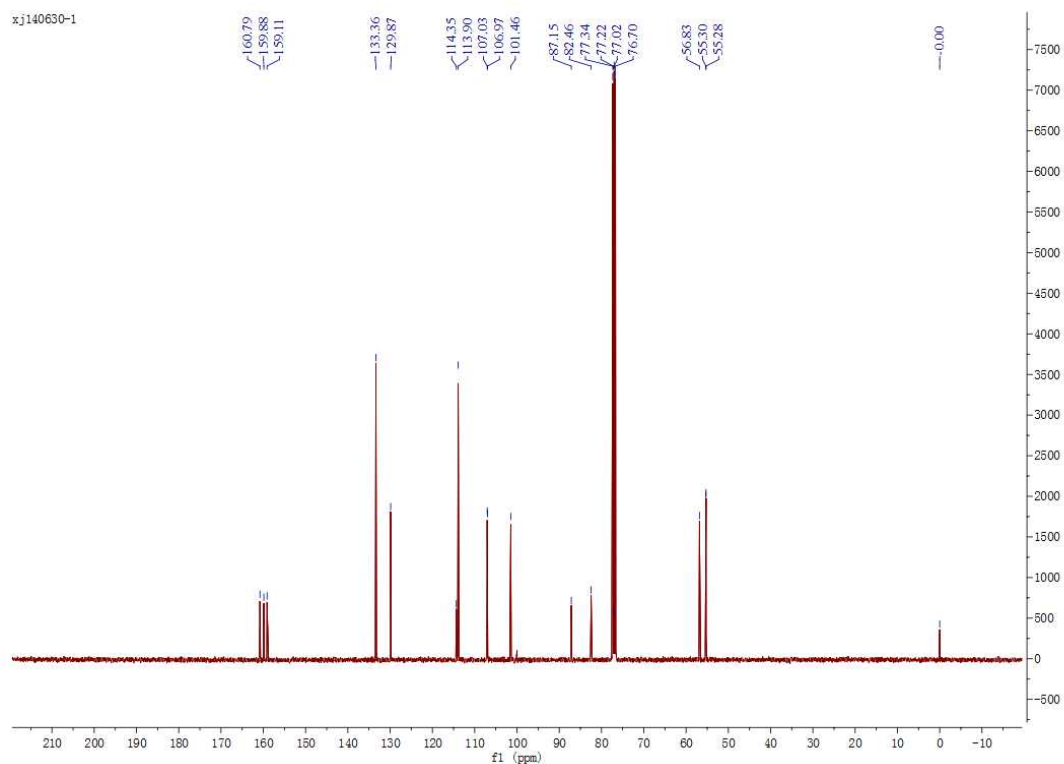

1-(4-((3-(4-methoxyphenyl)prop-2-yn-1-yl)oxy)phenyl)ethanone (**1o**)

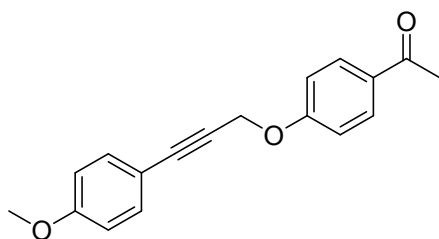

Prepared according to General Procedure **B**.

**<sup>1</sup>H NMR** (400 MHz, CDCl<sub>3</sub>) δ 7.96 (d, *J* = 8.8 Hz, 2H), 7.37 (d, *J* = 8.8 Hz, 2H), 7.07 (d, *J* = 8.9 Hz, 2H), 6.83 (d, *J* = 8.8 Hz, 2H), 4.97 (s, 2H), 3.80 (s, 3H), 2.57 (s, 3H).

**<sup>13</sup>C NMR** (100 MHz, CDCl<sub>3</sub>) δ 196.82, 161.65, 160.05, 133.39, 130.84, 130.53, 114.66, 113.97, 87.83, 81.66, 56.86, 55.31, 26.41.



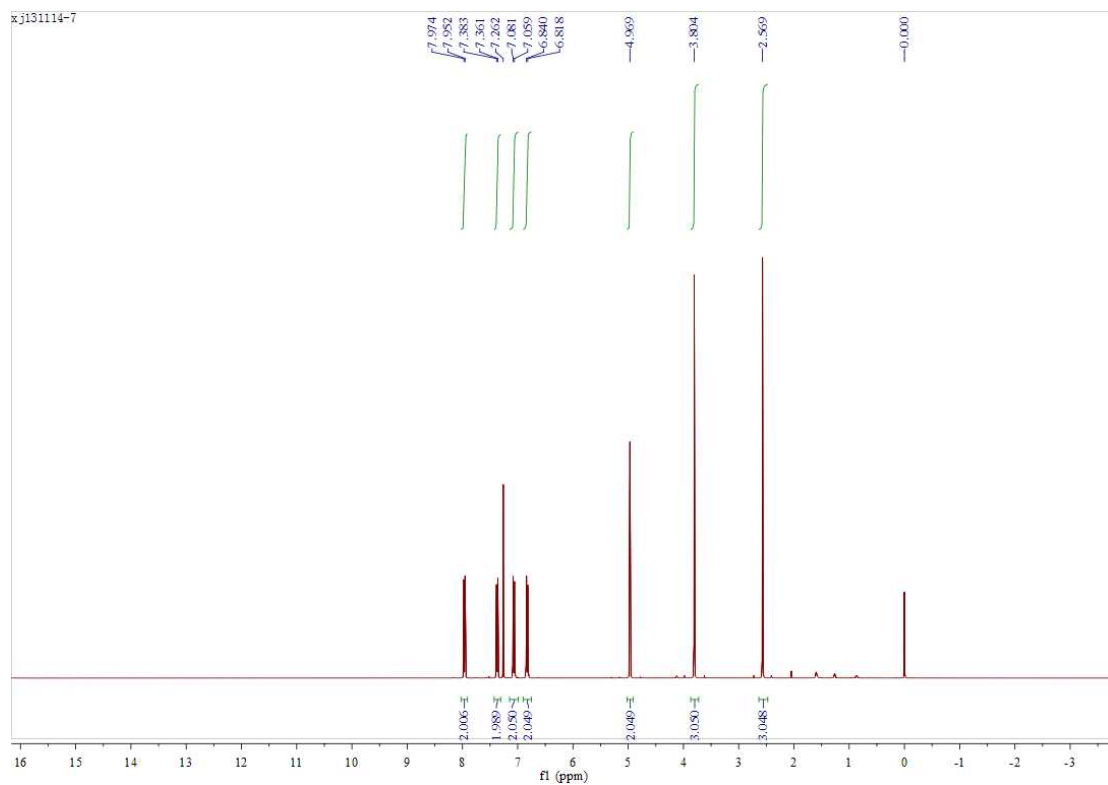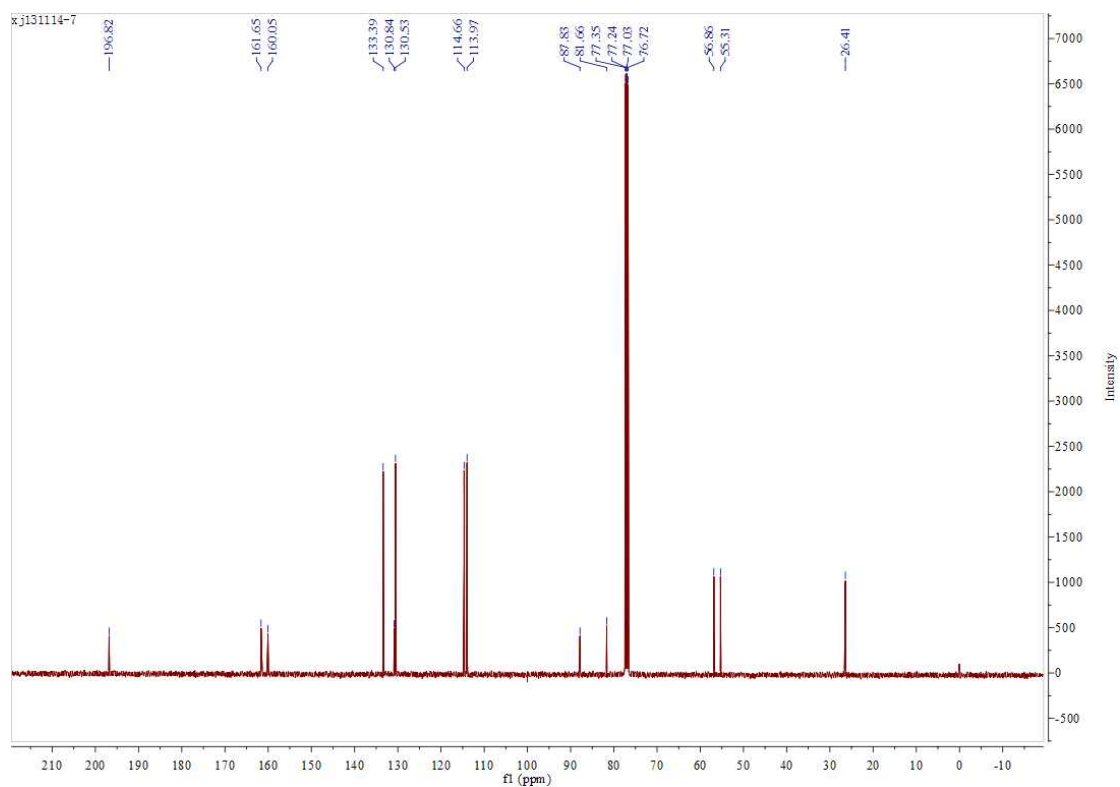

1-methoxy-4-(5-phenylpent-1-yn-1-yl)benzene (**1p**)

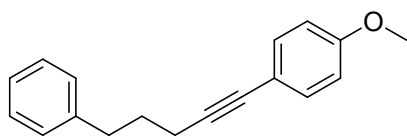

Prepared according to General Procedure **B**.

**<sup>1</sup>H NMR** (400 MHz, CDCl<sub>3</sub>) δ 7.34 (d, *J* = 8.8 Hz, 2H), 7.32 – 7.26 (m, 2H), 7.20 (m, 3H), 6.81 (d, *J* = 8.8 Hz, 2H), 3.79 (s, 3H), 2.83 (t, *J* = 7.8 Hz, 2H), 2.40 (t, *J* = 7.0 Hz, 2H), 1.97 – 1.86 (m, 2H).

**<sup>13</sup>C NMR**(100 MHz, CDCl<sub>3</sub>) δ 159.02, 141.70, 132.87, 128.56, 128.34, 125.87, 116.10, 113.81, 88.17, 80.82, 55.24, 34.85, 30.42, 18.83.

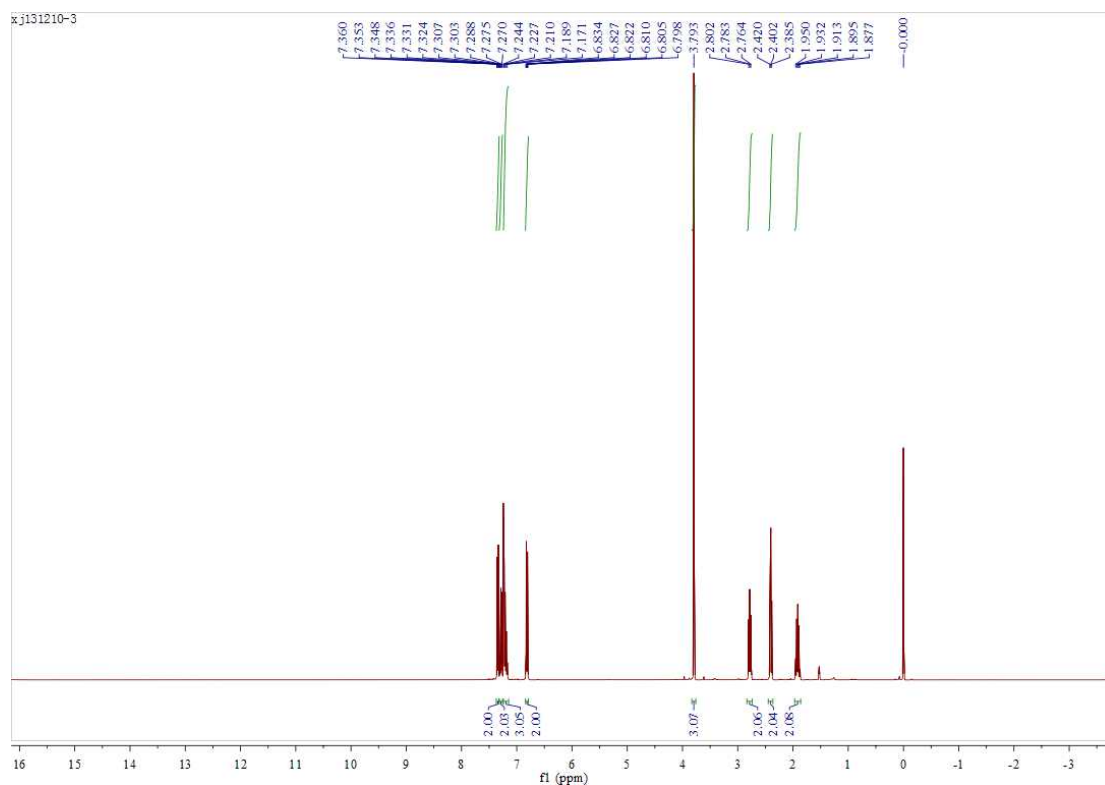

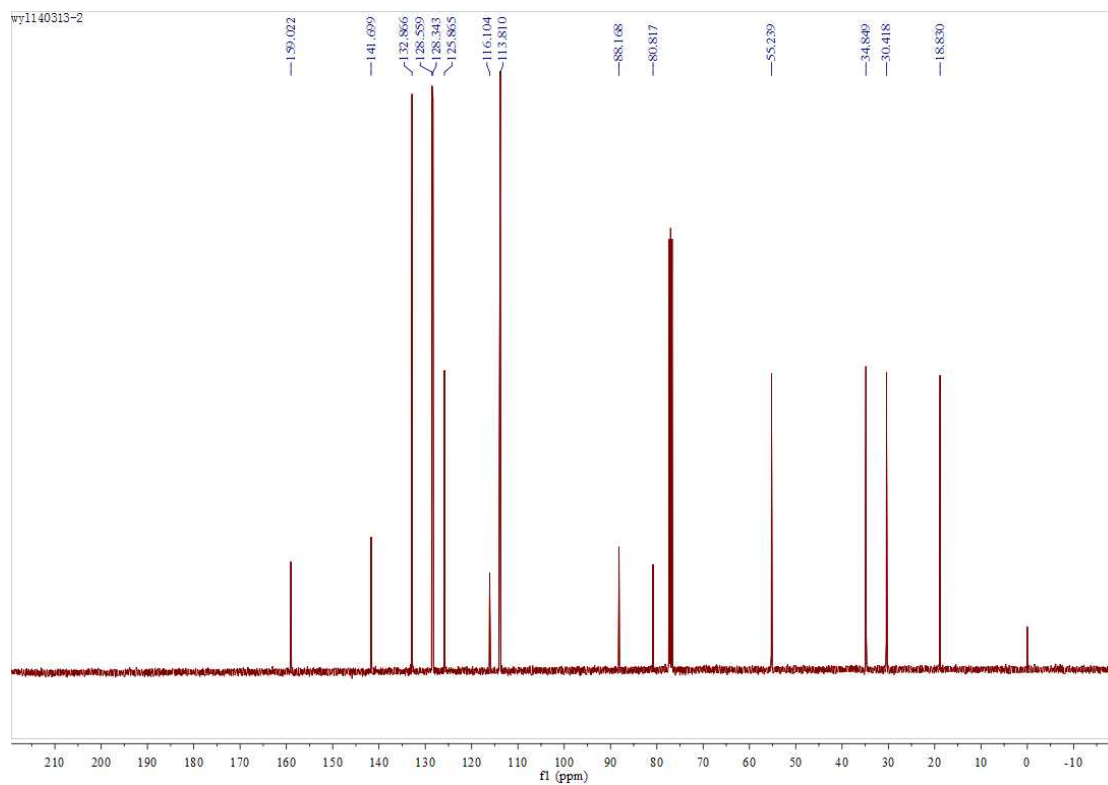

2-(4-(4-methoxyphenyl)but-3-yn-1-yl)thiophene (**1r**)

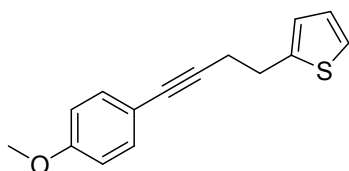

Prepared according to General Procedure **A**.

**<sup>1</sup>H NMR** (400 MHz, CDCl<sub>3</sub>) δ 7.33 (d, *J* = 8 Hz, 2H), 7.15 (dd, *J* = 5.1, 1.2 Hz, 4H), 6.97 – 6.93 (m, 1H), 6.91 – 6.89 (m, 1H), 6.81 (d, *J* = 8 Hz, 2H), 3.79 (s, 3H), 3.13 (t, *J* = 7.3 Hz, 2H), 2.73 (t, *J* = 7.4 Hz, 2H).

**<sup>13</sup>C NMR** (100 MHz, CDCl<sub>3</sub>) δ 159.17, 143.29, 132.91, 126.74, 124.83, 123.58, 115.86, 113.85, 87.36, 81.47, 55.28, 29.59, 22.20 .

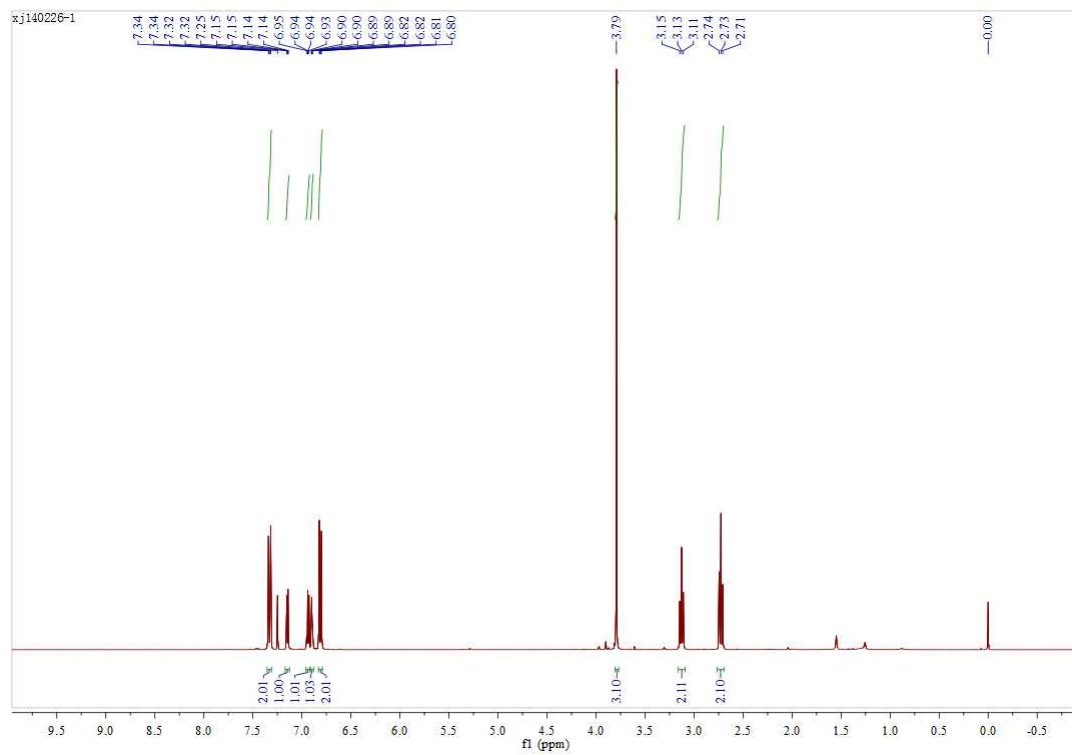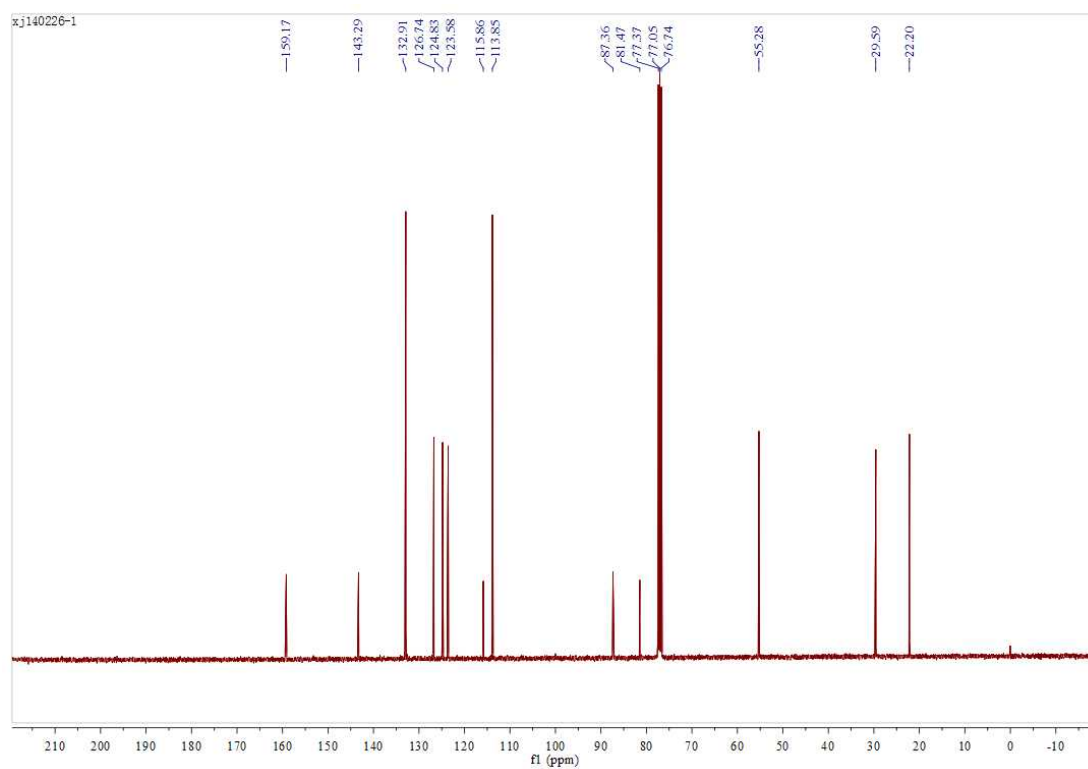

(8S,9S,13S)-3-((3-(4-methoxyphenyl)prop-2-yn-1-yl)oxy)-13-methyl-7,8,9,11,12,13,15,16-octahydro-6H-cyclopenta[a]phenanthren-17(14H)-one (**1s**)

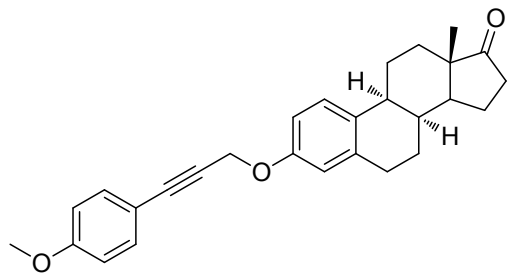

Prepared according to General Procedure B.

**<sup>1</sup>H NMR** (400 MHz, CDCl<sub>3</sub>) δ 7.38 (d, *J* = 8.8 Hz, 2H), 7.23 (d, *J* = 8.4 Hz, 1H), 6.87 – 6.80 (m, 3H), 6.77 (d, *J* = 2.7 Hz, 1H), 4.86 (s, 2H), 3.80 (s, 3H), 2.94 – 2.89 (m, 2H), 2.54 – 2.47 (m, 1H), 2.43 – 2.36 (m, 1H), 2.32 – 2.22 (m, 1H), 2.21 – 1.90 (m, 4H), 1.71 – 1.38 (m, 6H), 0.91 (s, 3H).

**<sup>13</sup>C NMR** (100 MHz, CDCl<sub>3</sub>) δ 220.88, 159.88, 155.94, 137.82, 133.36, 132.77, 126.35, 115.09, 114.48, 113.92, 112.49, 87.01, 82.80, 56.78, 55.29, 50.46, 48.02, 44.03, 38.35, 35.89, 31.62, 29.70, 26.56, 25.92, 21.61, 13.88.

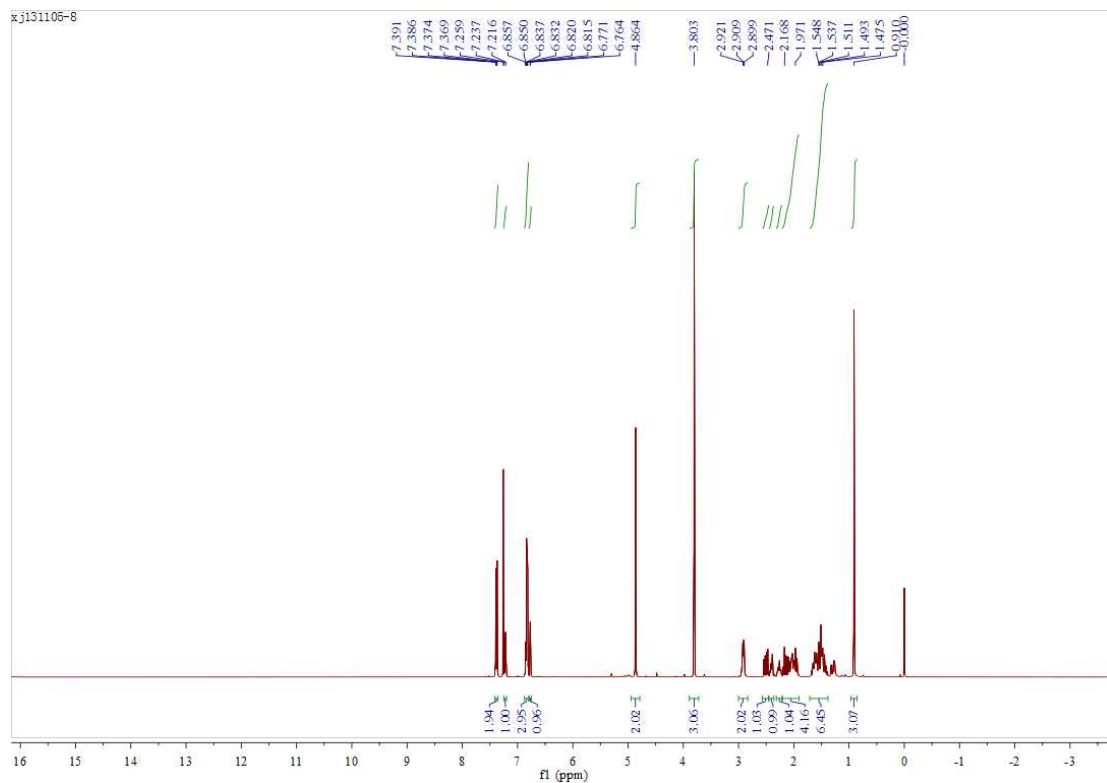

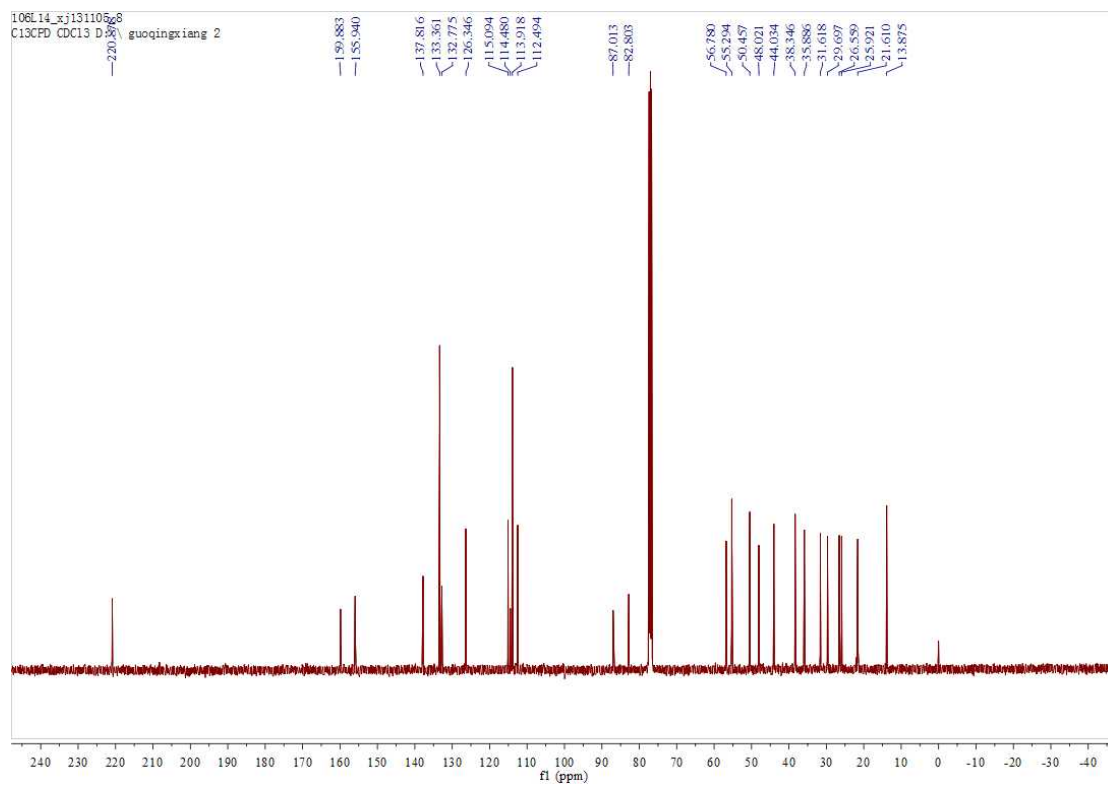

5-(4-phenylbut-3-yn-1-yl)-2,3-dihydrobenzofuran (**1t**)

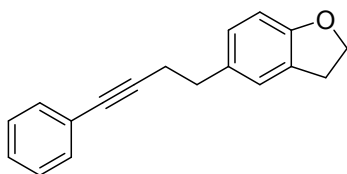

Prepared according to General Procedure **A**.

**<sup>1</sup>H NMR** (400 MHz, CDCl<sub>3</sub>) δ 7.41 – 7.35 (m, 2H), 7.31 – 7.24 (m, 3H), 7.10 (s, 1H), 7.00 (d, *J* = 8.1 Hz, 1H), 6.72 (d, *J* = 8.1 Hz, 1H), 4.54 (t, *J* = 8.7 Hz, 2H), 3.18 (t, *J* = 8.7 Hz, 2H), 2.84 (t, *J* = 7.5 Hz, 2H), 2.64 (t, *J* = 7.5 Hz, 2H).

**<sup>13</sup>C NMR** (100 MHz, CDCl<sub>3</sub>) δ 158.60, 132.74, 131.50, 128.18, 128.00, 127.59, 126.99, 125.05, 123.86, 108.94, 89.70, 81.28, 71.17, 34.64, 29.78, 22.24.

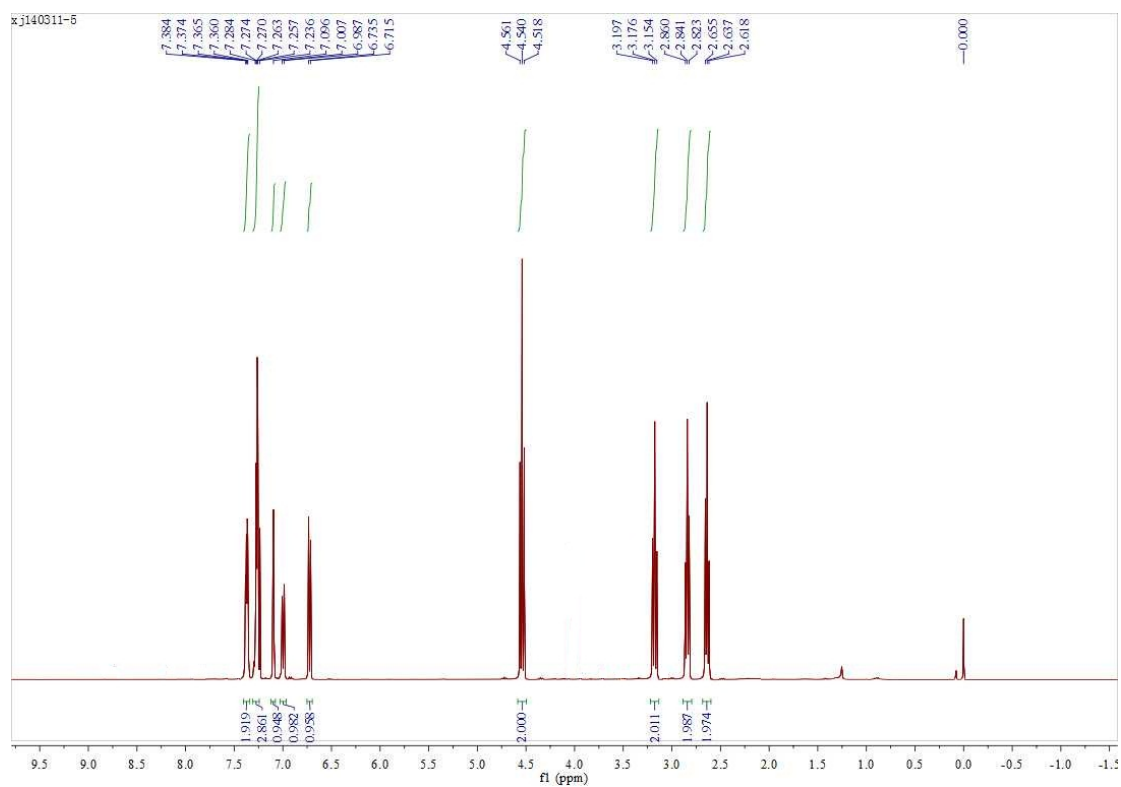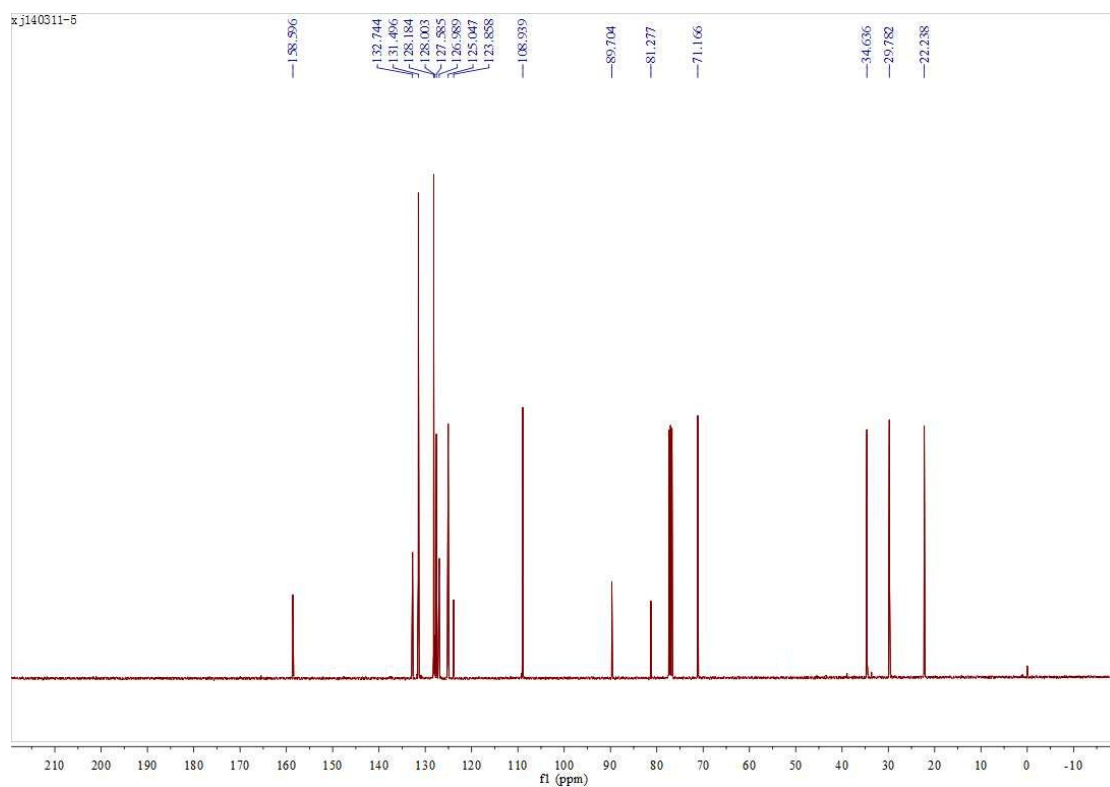

5-(4-(thiophen-2-yl)but-3-yn-1-yl)-2,3-dihydrobenzofuran (**1u**)

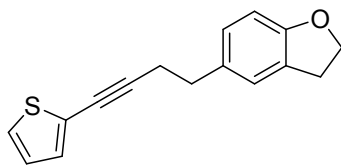

Prepared according to General Procedure A.

**<sup>1</sup>H NMR** (400 MHz, CDCl<sub>3</sub>) δ 7.17 (dd, *J* = 5.2, 1.1 Hz, 1H), 7.10 (dd, *J* = 5.1, 1.4 Hz, 2H), 6.99 (d, *J* = 8.1 Hz, 1H), 6.93 (dd, *J* = 5.2, 3.6 Hz, 1H), 6.72 (d, *J* = 8.1 Hz, 1H), 4.55 (t, *J* = 8.7 Hz, 2H), 3.19 (t, *J* = 8.7 Hz, 2H), 2.84 (t, *J* = 7.5 Hz, 2H), 2.65 (t, *J* = 7.5 Hz, 2H).

**<sup>13</sup>C NMR** (100 MHz, CDCl<sub>3</sub>) δ 158.65, 132.57, 130.98, 127.98, 127.04, 126.77, 126.01, 125.06, 124.01, 109.00, 93.78, 74.46, 71.19, 34.44, 29.79, 22.53.

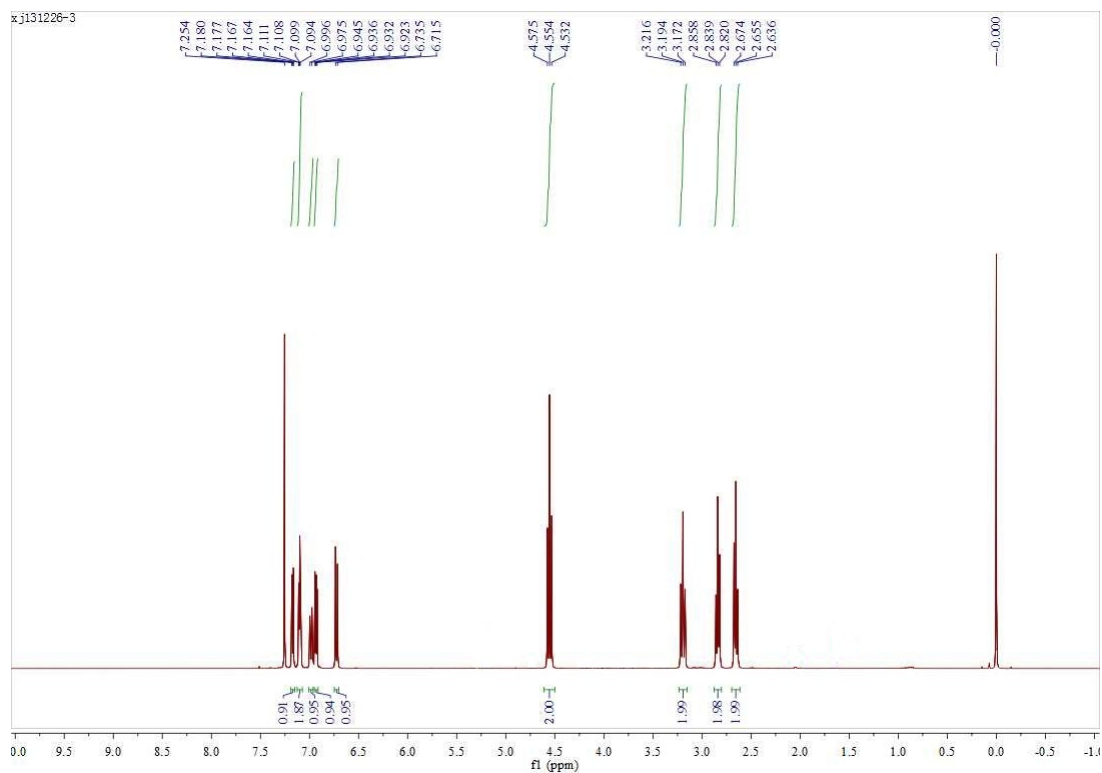



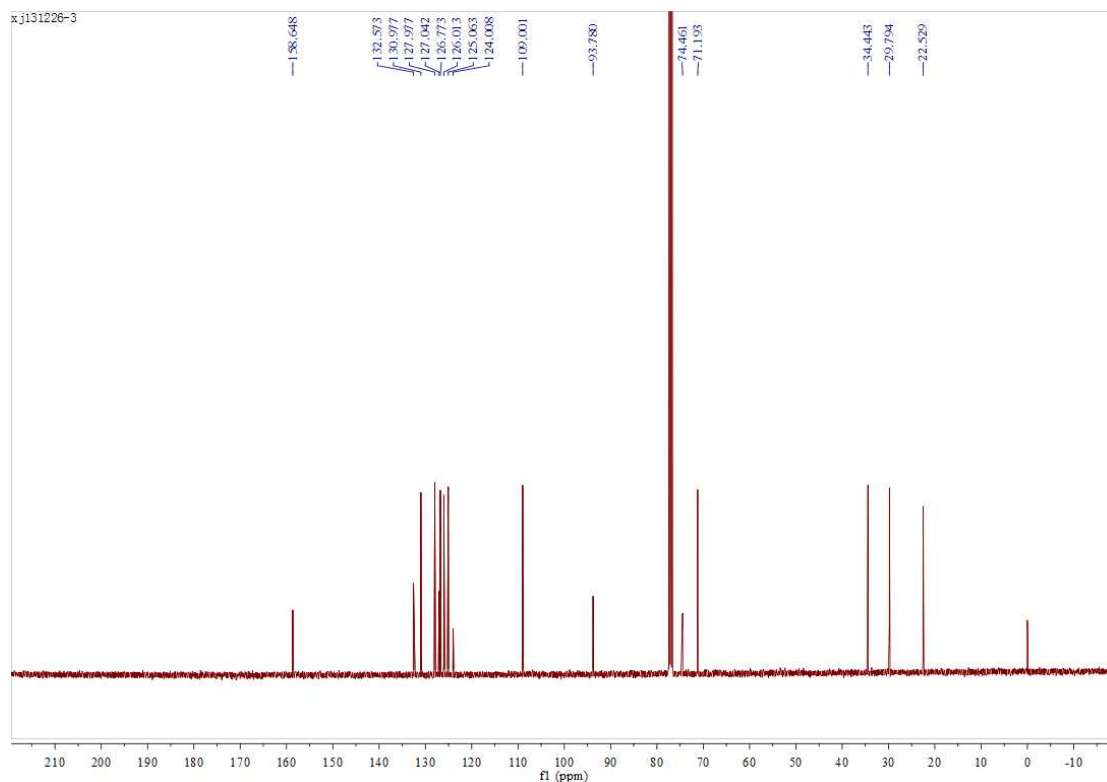

(E)-hex-1-en-3-yne-1,6-diyl dibenzene (**1v**)<sup>1</sup>

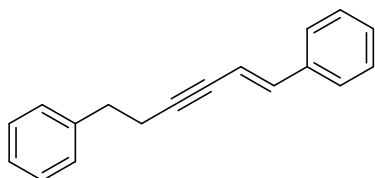

To a suspension of tetrakis(triphenylphosphine)palladium(0) (0.29 mmol) and (*E*)-styrylboronic acid (5 mmol) in dioxane (50 mL) was added (4-bromobut-3-yn-1-yl)benzene (7 mmol) and 3.0 M aqueous potassium hydroxide (10 mL) and the mixture stirred at 90 °C for 14 h. The reaction mixture was concentrated in vacuo and filtered through a plug of silica, eluting with diethyl ether (3×10 mL). The solvent was removed in vacuo and the crude residue was purified by flash chromatography to give compound **1u** as a yellow solid.

<sup>1</sup>H NMR (400 MHz, CDCl<sub>3</sub>) δ 7.32 – 7.10 (m, 10H), 6.78 (d, *J* = 16.2 Hz, 1H), 6.06 (d, *J* = 16.2, 1H), 2.80 (t, *J* = 7.6 Hz, 2H), 2.57 (t, *J* = 7.6 Hz, 2H).

<sup>13</sup>C NMR (100 MHz, CDCl<sub>3</sub>) δ 140.72, 140.35, 136.51, 128.72, 128.54, 128.47, 128.37, 126.39, 126.14, 108.70, 92.08, 80.49, 35.26, 21.97.

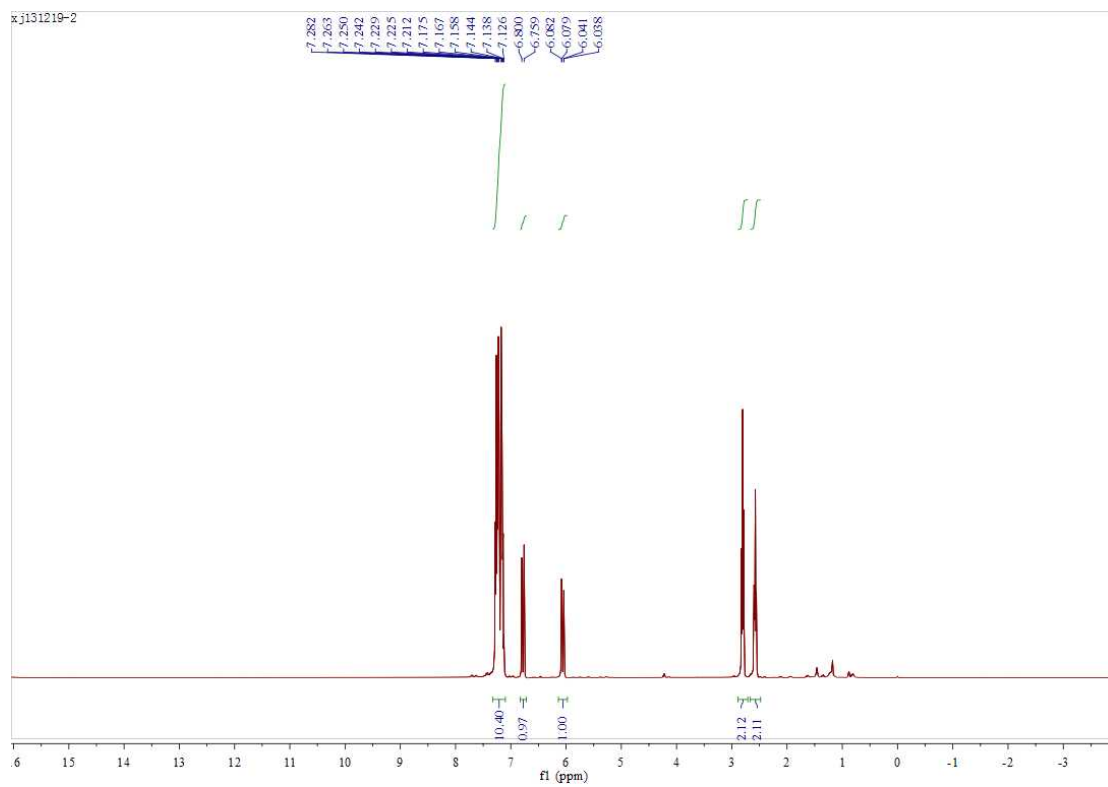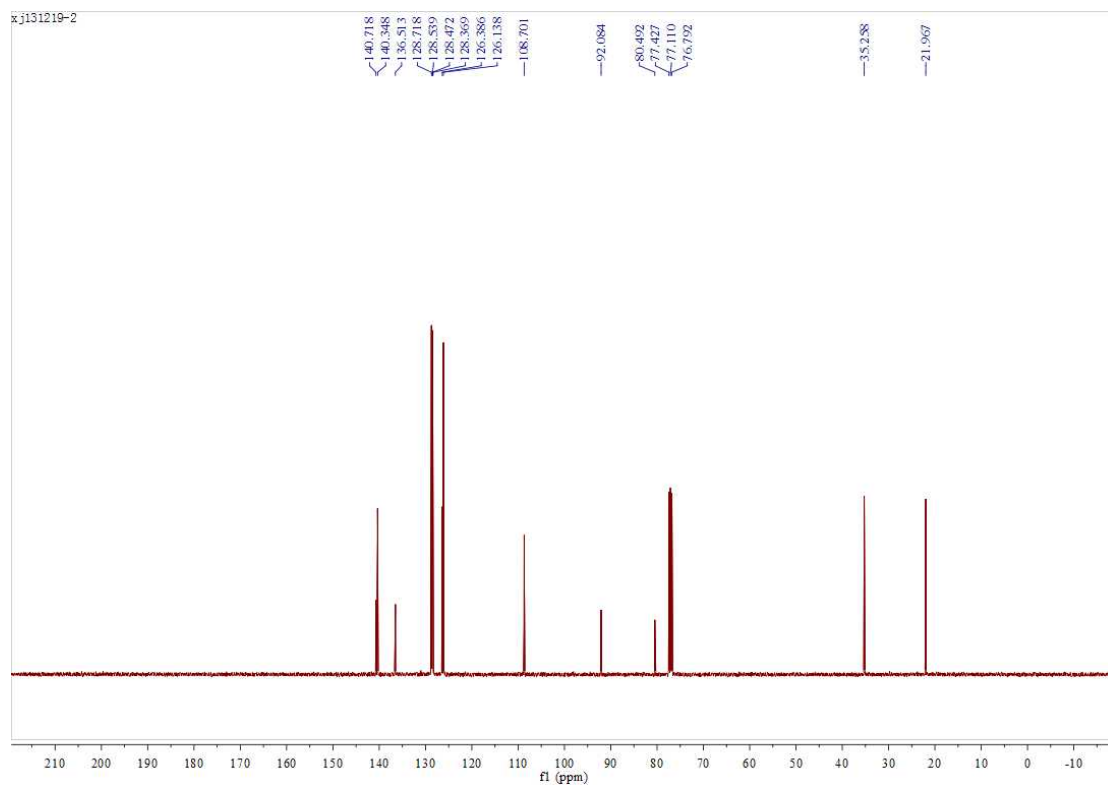

5-(4-(6-methoxynaphthalen-2-yl)but-3-yn-1-yl)-2,3-dihydrobenzofuran (**1w**)

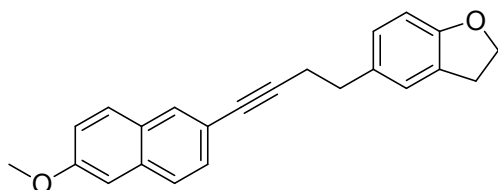

Prepared according to General Procedure A.

**<sup>1</sup>H NMR** (400 MHz, CDCl<sub>3</sub>) δ 7.81 (s, 1H), 7.65 (t, *J* = 9.4 Hz, 2H), 7.40 (d, *J* = 8.4 Hz, 1H), 7.17 – 7.11 (m, 2H), 7.09 (s, 1H), 7.02 (d, *J* = 8 Hz, 1H), 6.74 (d, *J* = 8.1 Hz, 1H), 4.56 (t, *J* = 8.7 Hz, 2H), 3.93 (s, 3H), 3.20 (t, *J* = 8.6 Hz, 2H), 2.88 (t, *J* = 7.5 Hz, 2H), 2.68 (t, *J* = 7.4 Hz, 2H).

**<sup>13</sup>C NMR** (100 MHz, CDCl<sub>3</sub>) δ 158.65, 158.05, 133.77, 132.85, 130.89, 129.24, 129.15, 128.53, 128.05, 127.02, 126.65, 125.09, 119.24, 118.84, 109.00, 105.78, 89.29, 81.71, 71.20, 55.34, 34.78, 29.84, 22.36.

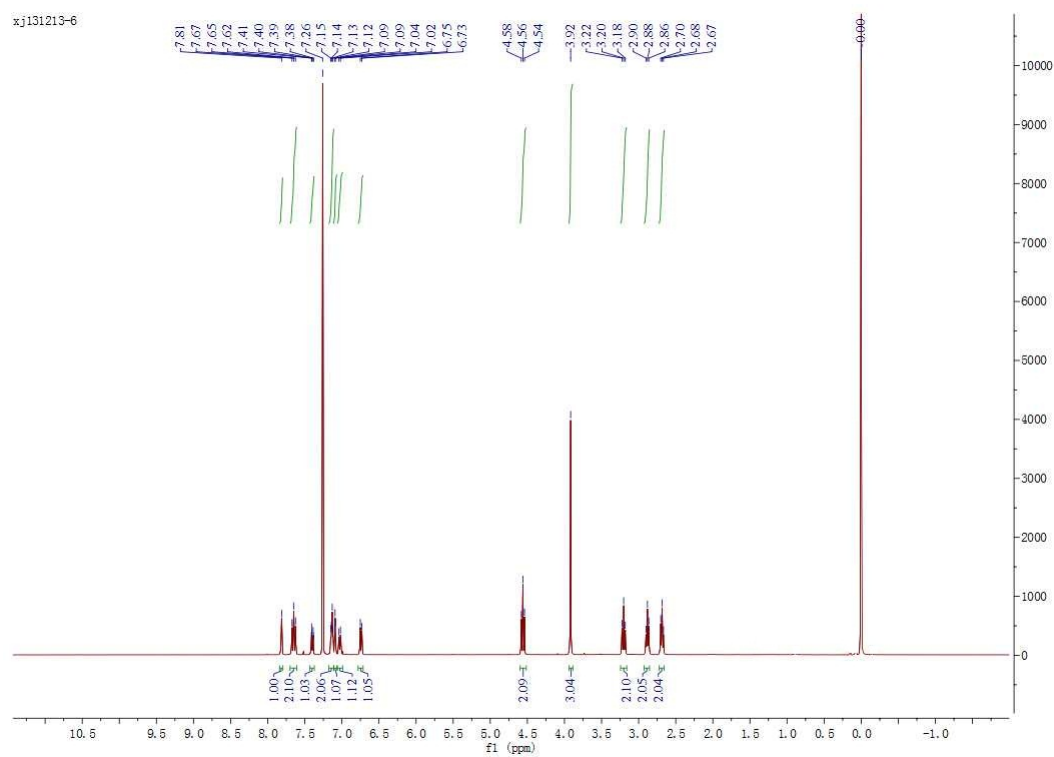

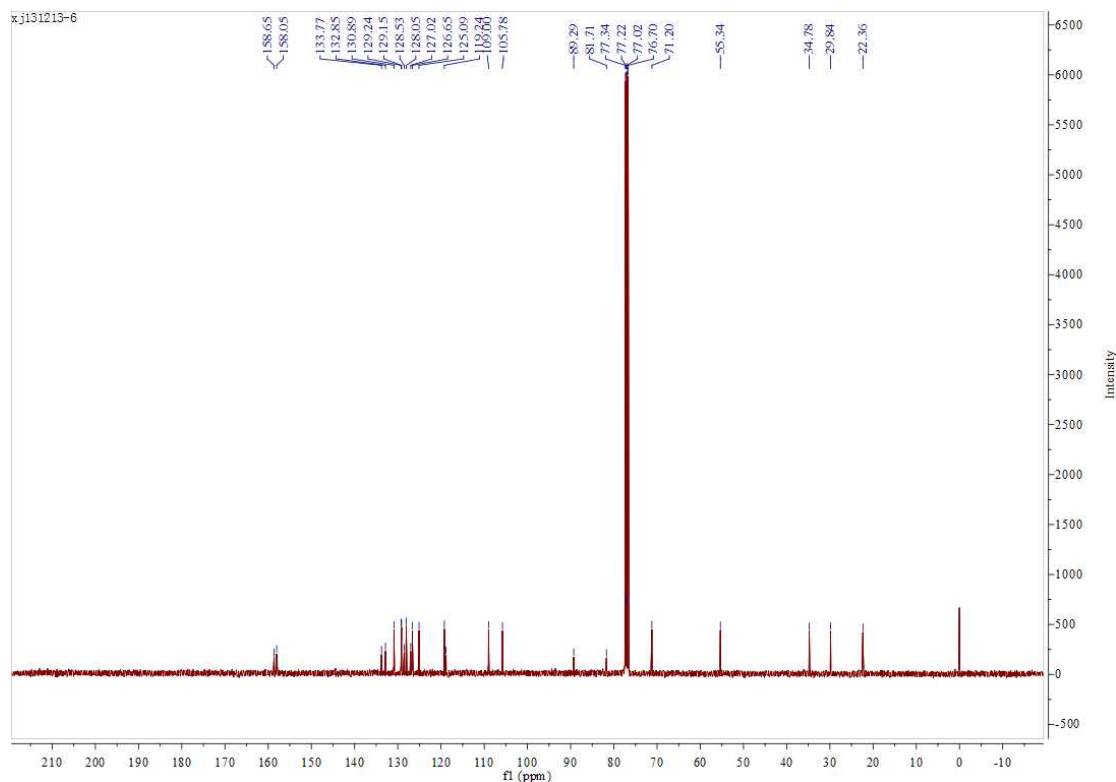

### 3-(4-phenylbut-1-yn-1-yl)oxazolidin-2-one (**1x**)<sup>1</sup>

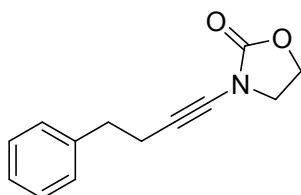

To a solution of oxazolidin-2-one (10 mmol), CuCl<sub>2</sub> (0.4 mmol) and sodium carbonate (4 mmol) in toluene (20 mL) was added pyridine (4 mmol). Oxygen was bubbled through the reaction mixture (20 min). The reaction was heated to 70 °C under an atmosphere of oxygen. A solution of but-3-yn-1-ylbenzene (2 mmol) in toluene (20 mL) was added dropwise over 4 h, by use of a syringe pump. Once the addition was complete, the reaction mixture was stirred at 70 °C for a further 12 h. The reaction mixture was cooled to room temperature and filtered through a plug of celite, eluting with dichloromethane (3 × 25 mL). The solvent was removed in vacuo and the crude residue was purified by flash chromatography to give compound **1w** as a white solid.

<sup>1</sup>H NMR (400 MHz, CDCl<sub>3</sub>) δ 7.26 – 7.20 (m, 2H), 7.19 – 7.10 (m, 3H), 4.41 – 4.24 (m, 2H), 3.83 – 3.68 (m, 2H), 2.78 (t, *J* = 7.6 Hz, 2H), 2.53 (t, *J* = 7.6 Hz, 2H).

<sup>13</sup>C NMR (100 MHz, CDCl<sub>3</sub>) δ 156.62, 140.54, 128.50, 128.41, 126.35, 70.78, 70.52, 62.87, 46.94, 35.20, 20.71.

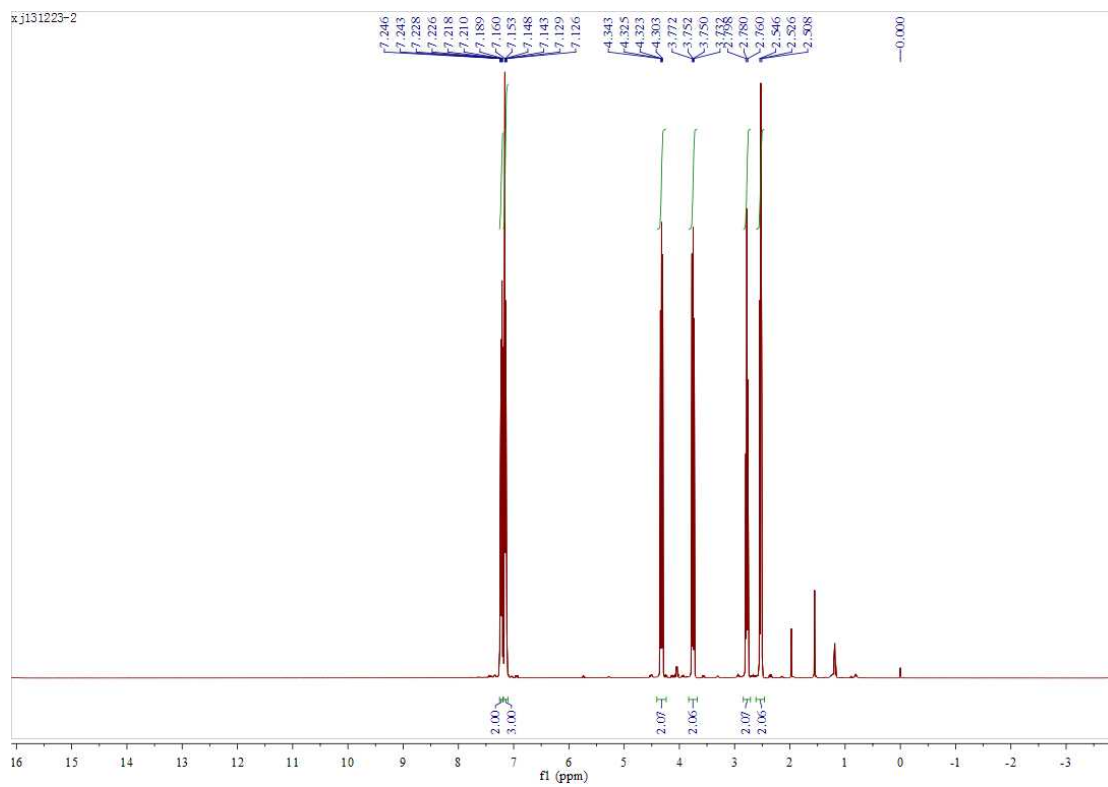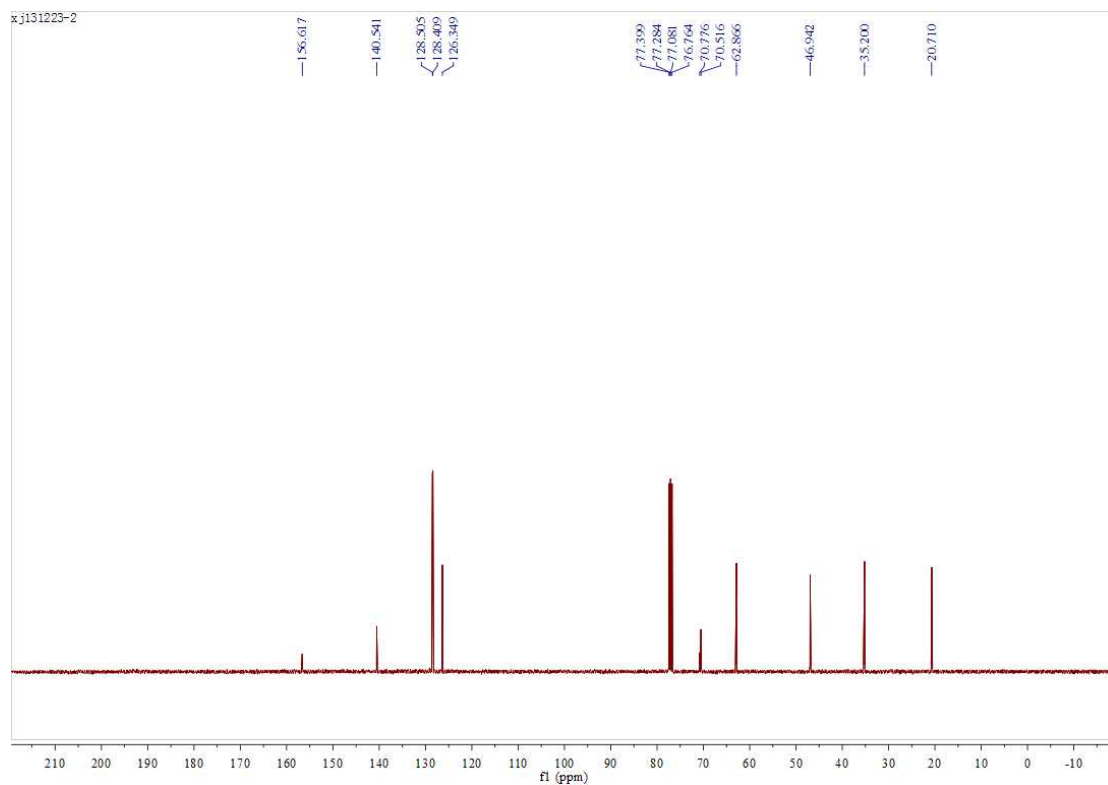

### **III. General Procedure for Copper-Catalyzed Trifluoromethylarylation of Alkynes.**

#### **1. General Procedure C for Copper-Catalyzed Trifluoromethylarylation of Alkynes.**

A reaction tube was charged with Cu (1.28 mg, 10 mmol%), **1** (0.2 mmol) and **2a** (0.24 mmol, 81.6 mg), the vessel was sealed before being evacuated and filled with argon (three times). DMF (0.4 mmol, 30.8  $\mu$ L), and DCE (1 mL) were added in turn by syringe under an argon atmosphere. After addition of all substrates, the reaction mixture was kept for 24 h at the specified temperature. At the conclusion of the reaction, water was added to the mixture at room temperature. The resulting mixture was extracted by ethyl acetate three times, and the combined organic phase was washed with brine for once and then dried over magnesium sulfate. After filtration and evaporation of the solvent, the crude mixture was purified by column chromatography on silica gel with petroleum ether/ethyl acetate to yield the products **3**.

#### **2. General Procedure D for Copper-Catalyzed Trifluoromethylarylation of Alkynes.**

A reaction tube was charged with Cu (1.28 mg, 10 mmol%), **1** (0.2 mmol) and **2a** (0.4 mmol, 136 mg), the vessel was sealed before being evacuated and filled with argon (three times). DMF (0.4 mmol, 30.8  $\mu$ L), and DCE (1 mL) were added in turn by syringe under an argon atmosphere. After addition of all substrates, the reaction mixture was kept for 24 h at the specified temperature. At the conclusion of the reaction, water was added to the mixture at room temperature. The resulting mixture was extracted by ethyl acetate three times, and the combined organic phase was washed with brine for once and then dried over magnesium sulfate. After filtration and evaporation of the solvent, the crude mixture was purified by column chromatography on silica gel with petroleum ether/ethyl acetate to yield the products **3**.

#### **3. General Procedure E for Copper-Catalyzed Trifluoromethylarylation of Alkynes.**

A reaction tube was charged with Cu (0.32 mg, 2.5 mmol%), **1** (0.4 mmol) and **2b** (0.2 mmol, 80.4 mg), the vessel was sealed before being evacuated and filled with argon (three times). DMF (0.4 mmol, 30.8  $\mu$ L), and DCE (1 mL) were added in turn by syringe under an argon atmosphere. After addition of all substrates, the reaction mixture was kept for 24 h at the specified temperature. At the conclusion of the reaction, water was added to the mixture at room temperature. The resulting mixture was extracted by ethyl acetate three times, and the combined organic phase was washed with brine for once and then dried over magnesium sulfate. After filtration and evaporation of the solvent, the crude mixture was purified by column chromatography on silica gel with petroleum ether/ethyl acetate to yield the products **3**.

#### 4. Copper-Catalyzed Trifluoromethylarylation of Alkynes.

##### 4-(4-methoxyphenyl)-3-(trifluoromethyl)-1,2-dihydronaphthalene (**3a**)

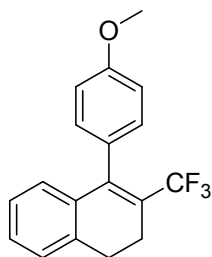

Prepared according to General Procedure C.

**<sup>1</sup>H NMR** (400 MHz, CDCl<sub>3</sub>) δ 7.22– 7.19 (m, 2H), 7.12 – 7.04 (m, 3H), 6.94 (d, *J* = 8.8Hz, 2H), 6.71 (d, *J* = 7.8 Hz, 1H), 3.85 (s, 3H), 2.95 (t, *J* = 8.0 Hz, 2H), 2.60 (t, *J* = 7.9, 2H).

**<sup>13</sup>C NMR** (100 MHz, CDCl<sub>3</sub>) δ 158.99, 141.77 (q, *J* = 4.0 Hz), 136.10, 135.25, 130.20 (q, *J* = 2.0, Hz), 129.27, 128.76, 127.78, 127.28, 126.55, 124.50 (q, *J* = 28.5 Hz), 124.36 (q, *J* = 271 Hz), 113.44, 55.21, 27.73, 22.54 (q, *J* = 2.6 Hz).

**<sup>19</sup>F NMR** (376 MHz, CDCl<sub>3</sub>) δ -59.09.

HRMS calcd for C<sub>18</sub>H<sub>15</sub>F<sub>3</sub>O ([M]<sup>+</sup>): 304.1075; found: 304.1071.

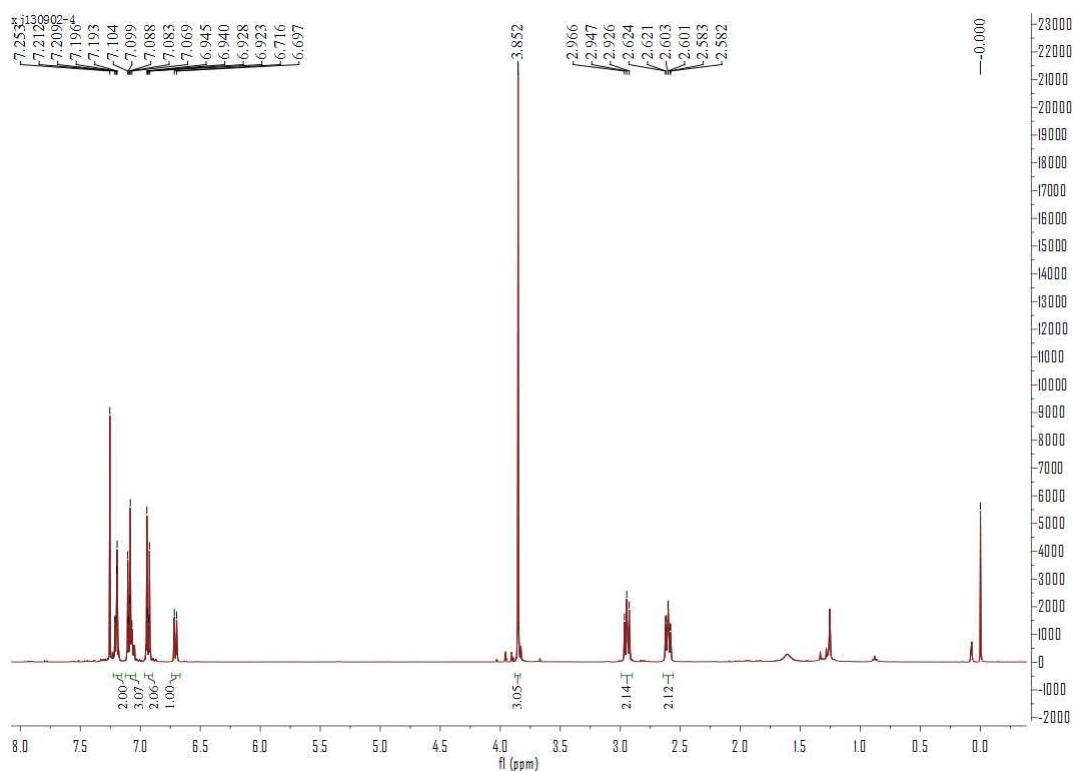

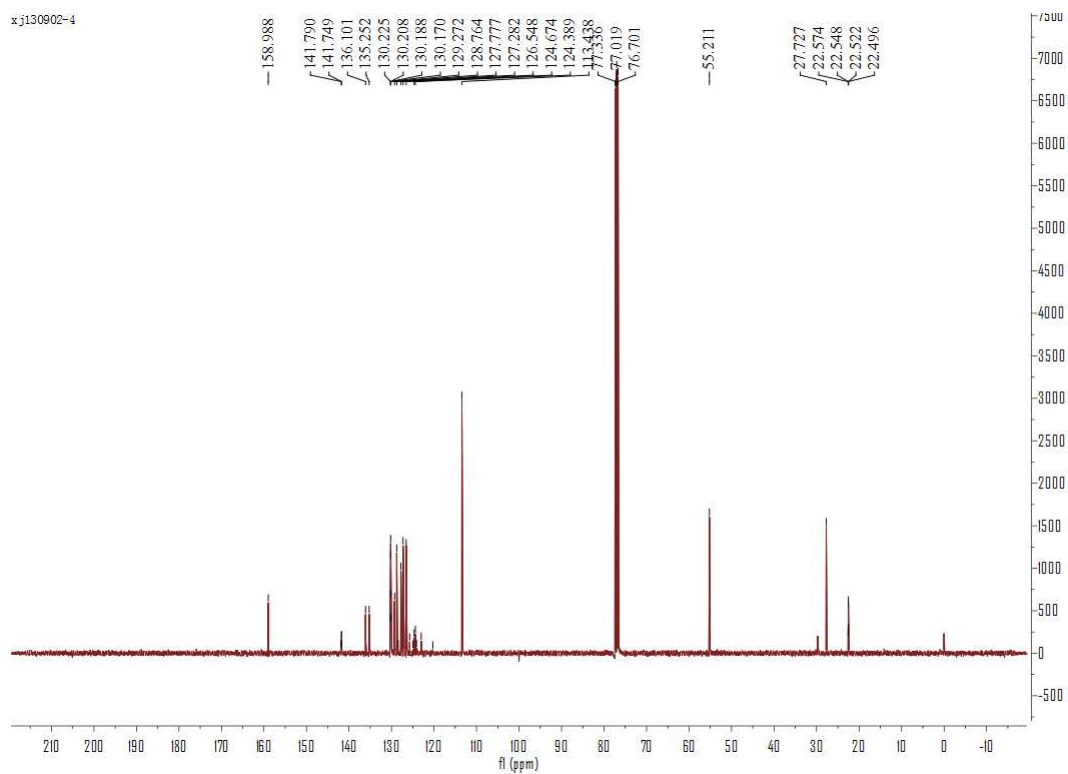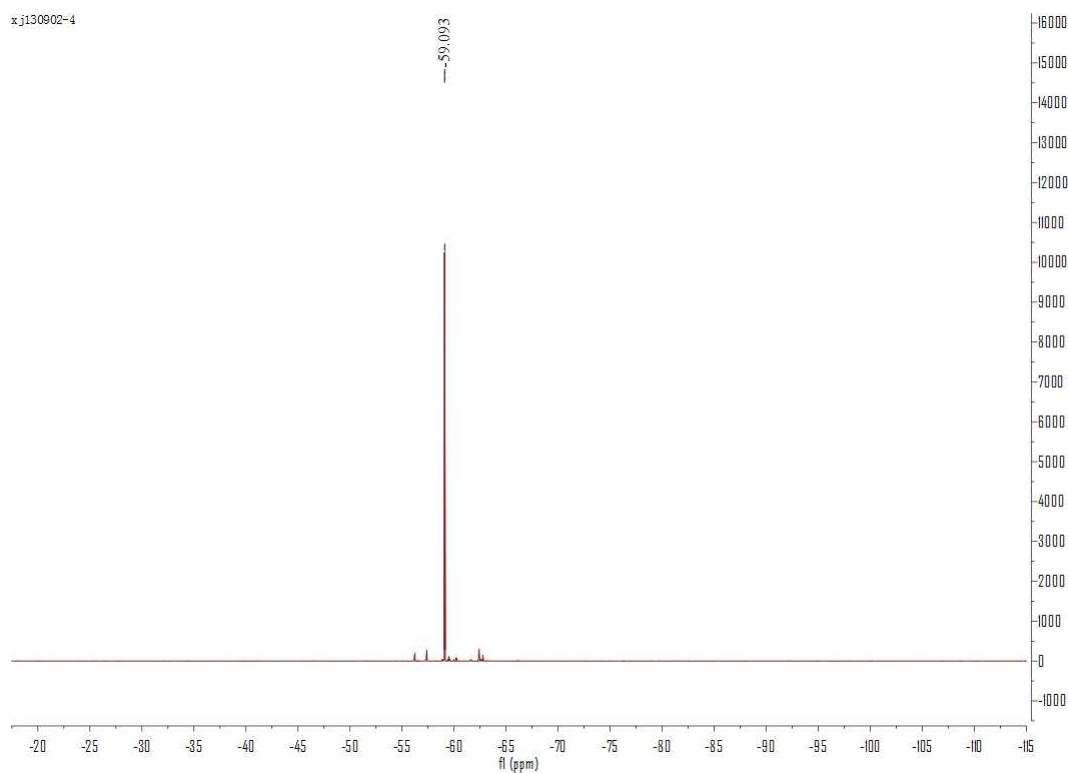



6-methoxy-4-(4-methoxyphenyl)-3-(trifluoromethyl)-1,2-dihydronaphthalene (**3b**)

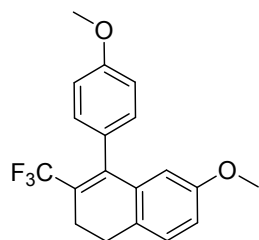

Prepared according to General Procedure C.

**<sup>1</sup>H NMR** (400 MHz, CDCl<sub>3</sub>) δ 7.10 (m, 3H), 6.92 (d, *J* = 8.8 Hz, 2H), 6.75 (dd, *J* = 8.2, 2.6 Hz, 1H), 6.28 (d, *J* = 2.6 Hz, 1H), 3.84 (s, 3H), 3.62 (s, 3H), 2.87 (t, *J* = 7.9 Hz, 2H), 2.58 (t, *J* = 7.9 Hz, 2H).

**<sup>13</sup>C NMR** (100 MHz, CDCl<sub>3</sub>) δ 159.01, 158.25, 141.72 (q, *J* = 4.0 Hz), 136.36, 130.17 (q, *J* = 1.9 Hz), 129.81, 129.14, 127.98, 125.10 (q, *J* = 28.4 Hz), 124.37 (q, *J* = 272 Hz), 114.44, 113.48, 113.27, 55.24, 26.84, 22.94 (q, *J* = 2.6 Hz).

**<sup>19</sup>F NMR** (376 MHz, CDCl<sub>3</sub>) δ -59.13.

HRMS calcd for C<sub>19</sub>H<sub>17</sub>F<sub>3</sub>O<sub>2</sub> ([M]<sup>+</sup>): 334.1181; found: 334.1184.

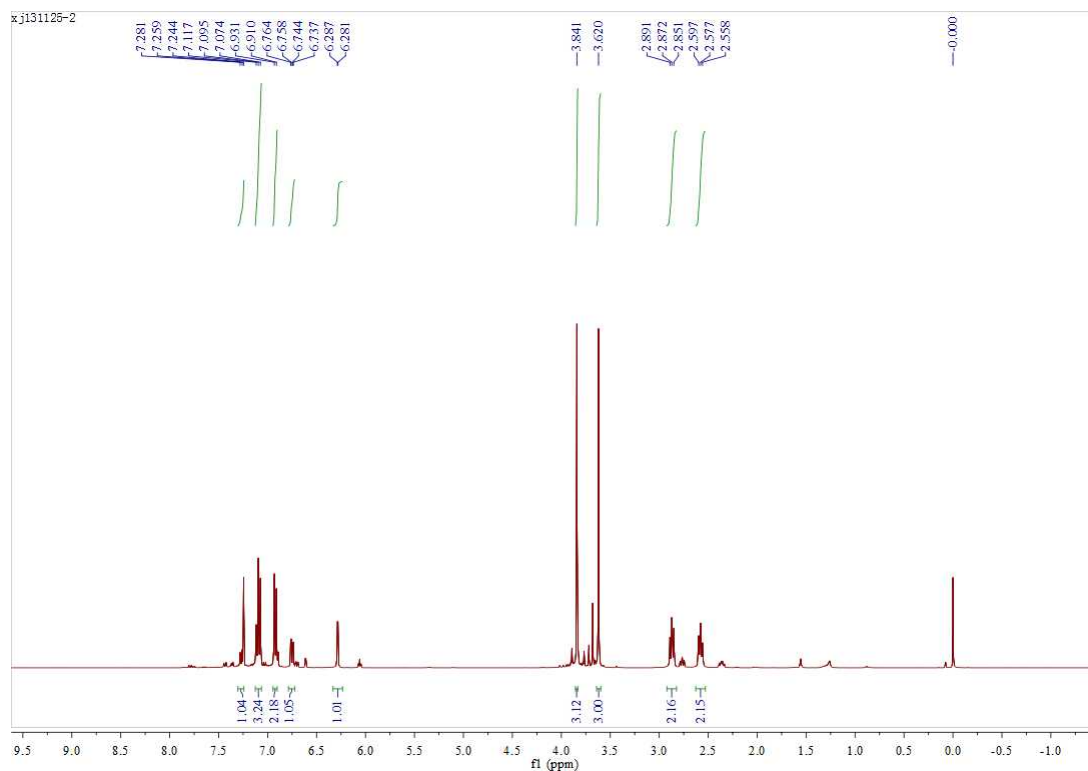

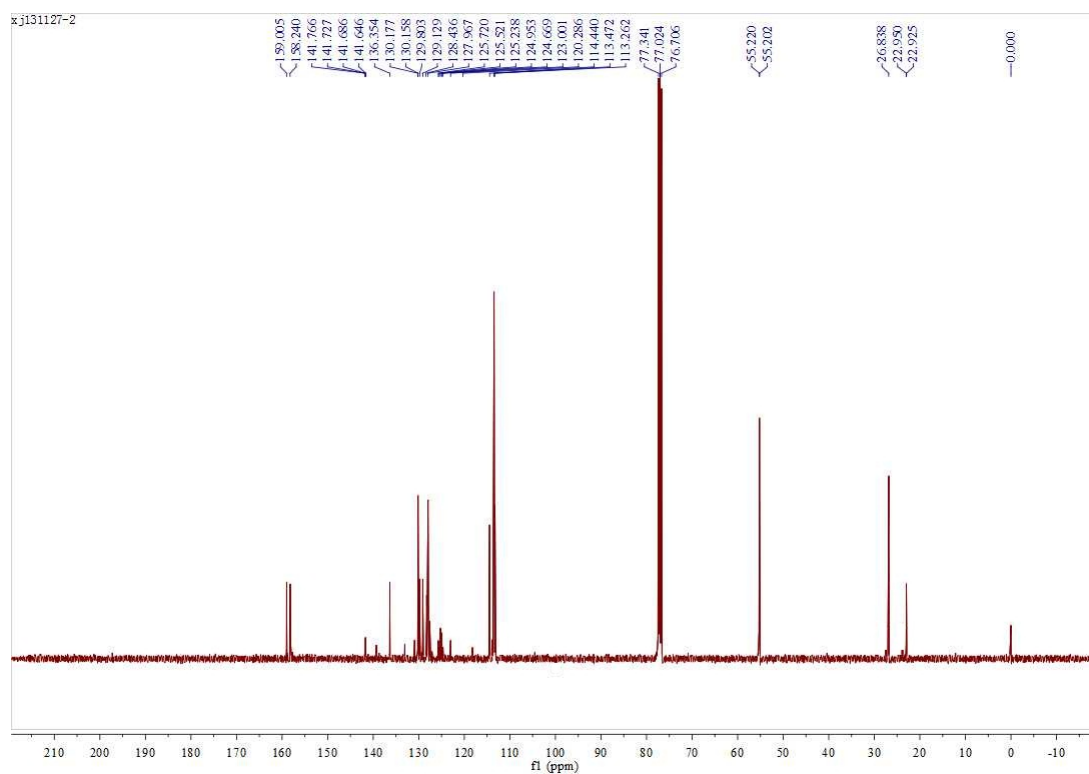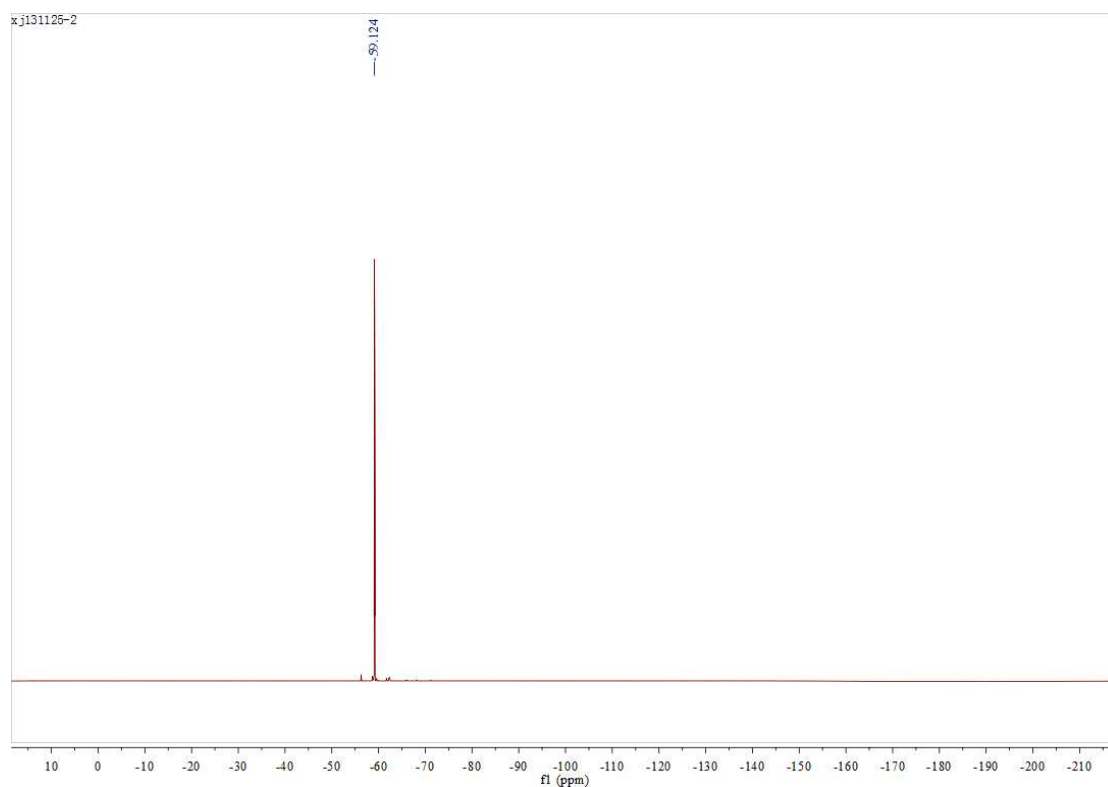

4-(4-methoxyphenyl)-6-methyl-3-(trifluoromethyl)-1,2-dihydronaphthalene (**3c**)

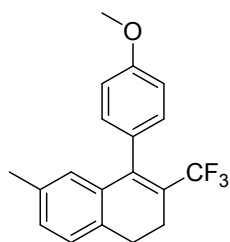

Prepared according to General Procedure C.

**<sup>1</sup>H NMR** (400 MHz, CDCl<sub>3</sub>) δ 7.09 (d, *J* = 8.4 Hz, 3H), 7.02 (d, *J* = 7.7 Hz, 1H), 6.94 (d, *J* = 8.7 Hz, 2H), 6.51 (s, 1H), 3.86 (s, 3H), 2.90 (t, *J* = 8.0 Hz, 2H), 2.57 (t, *J* = 8.0 Hz, 2H), 2.17 (s, 3H).

**<sup>13</sup>C NMR** (100 MHz, CDCl<sub>3</sub>) δ 158.92, 141.88 (q, *J* = 4.0 Hz), 136.09, 135.11, 133.14, 130.21 (q, *J* = 1.9 Hz), 129.42, 129.35, 128.42, 127.20, 124.56 (q, *J* = 28.3 Hz), 124.42 (q, *J* = 27.2 Hz), 113.41, 55.21, 27.37, 22.74 (q, *J* = 2.6 Hz), 21.20.

**<sup>19</sup>F NMR** (376 MHz, CDCl<sub>3</sub>) δ -58.96.

HRMS calcd for C<sub>19</sub>H<sub>17</sub>F<sub>3</sub>O ([M]<sup>+</sup>): 318.1231; found: 318.1228.

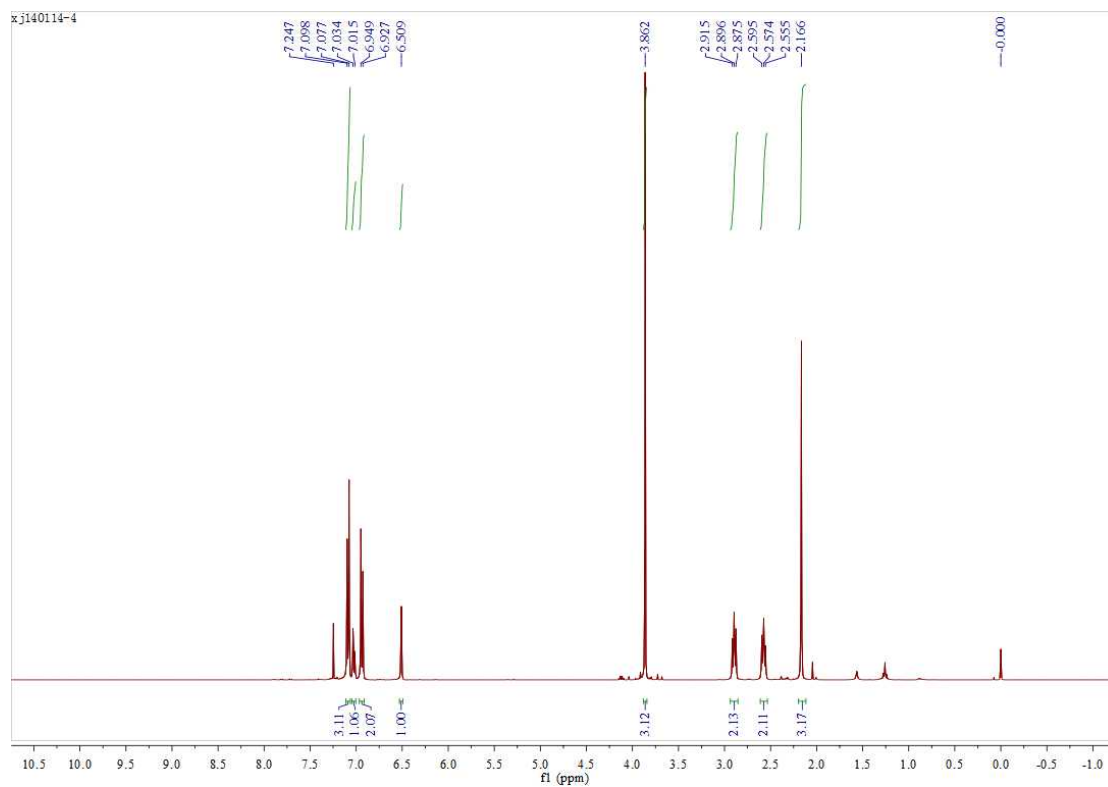

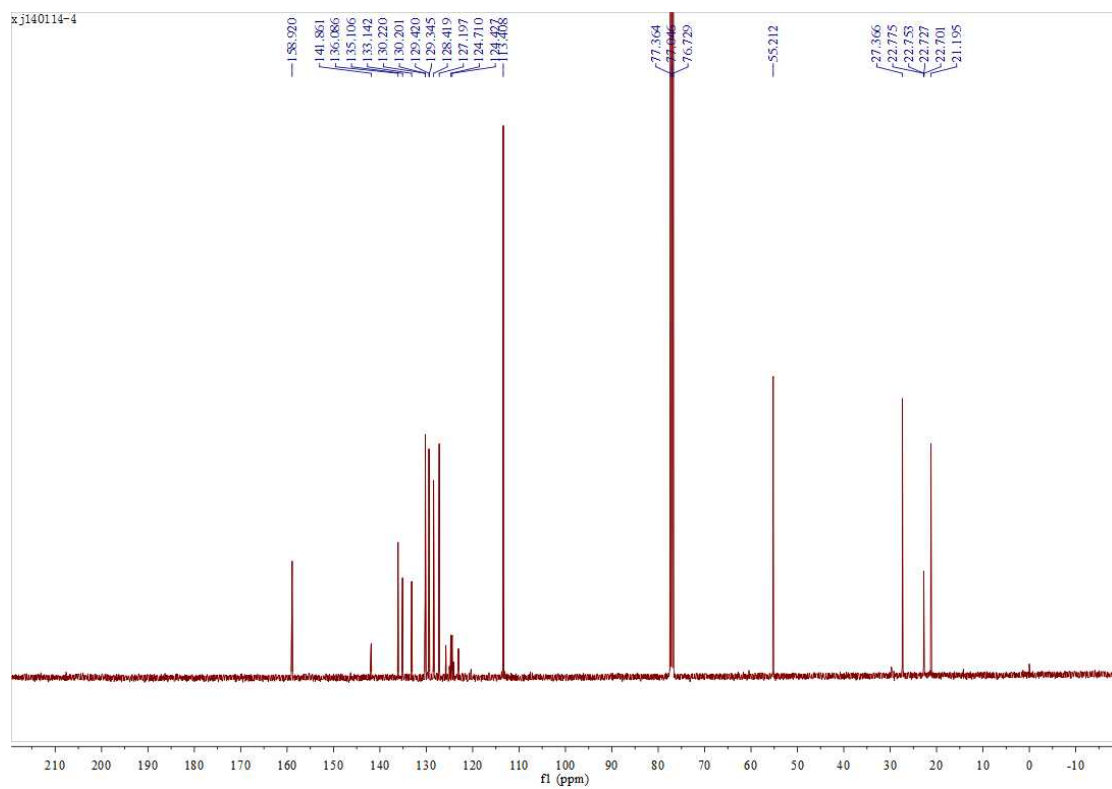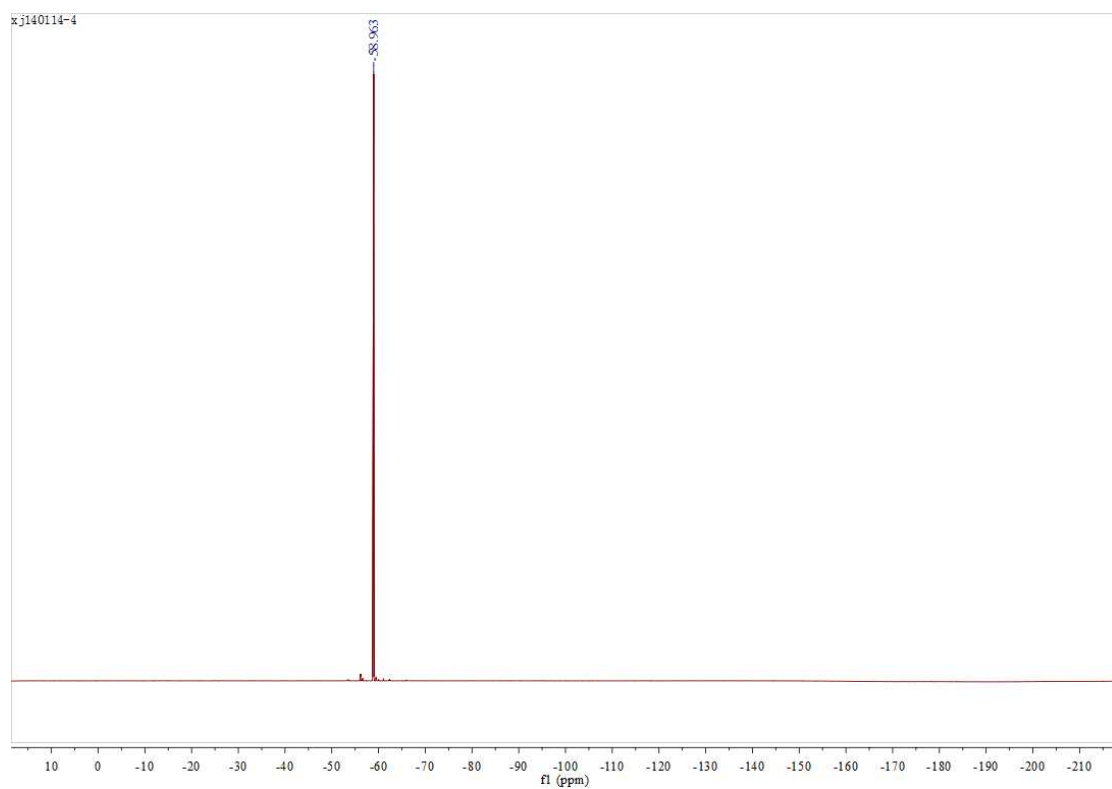

8-(4-methoxyphenyl)-7-(trifluoromethyl)-2,3,5,6-tetrahydronaphtho[2,3-b]furan (**3d**)

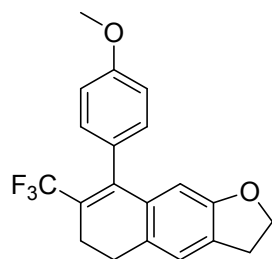

Prepared according to General Procedure C.

**<sup>1</sup>H NMR** (400 MHz, CDCl<sub>3</sub>) δ 7.09 – 7.02 (m, 3H), 6.91 (d, *J* = 8.6 Hz, 2H), 6.17 (s, 1H), 4.48 (t, *J* = 8.6 Hz, 2H), 3.83 (s, 3H), 3.16 (t, *J* = 8.6 Hz, 2H), 2.86 (t, *J* = 8.3 Hz, 2H), 2.56 (t, *J* = 7.9 Hz, 2H).

**<sup>13</sup>C NMR** (100 MHz, CDCl<sub>3</sub>) δ 158.91, 141.99 (q, *J* = 4.0 Hz), 135.23, 130.13 (q, *J* = 1.9 Hz), 129.81, 129.42, 128.50, 127.46, 124.47 (q, *J* = 272 Hz), 124.15 (q, *J* = 28.3 Hz), 123.68, 113.47, 108.99, 71.16, 55.24, 29.74, 27.53, 23.03 (q, *J* = 2.6 Hz).

**<sup>19</sup>F NMR** (376 MHz, CDCl<sub>3</sub>) δ -58.90.

HRMS calcd for C<sub>20</sub>H<sub>17</sub>F<sub>3</sub>O<sub>2</sub> ([M]<sup>+</sup>): 346.1181; found: 346.1180.

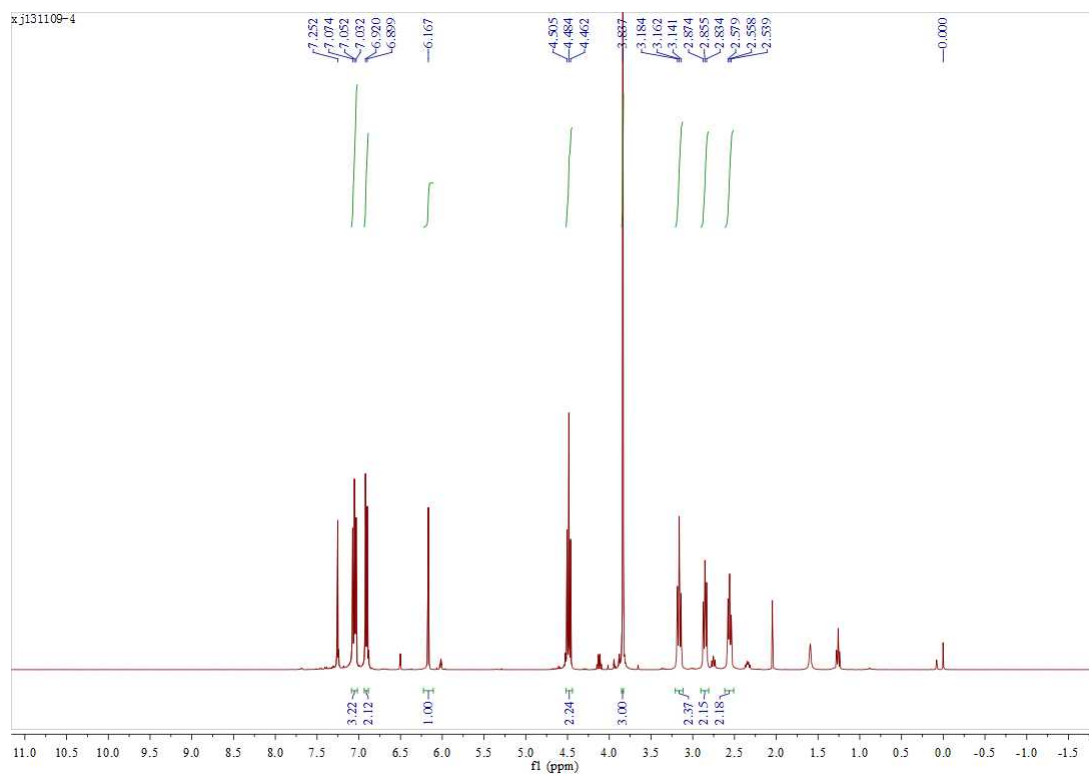

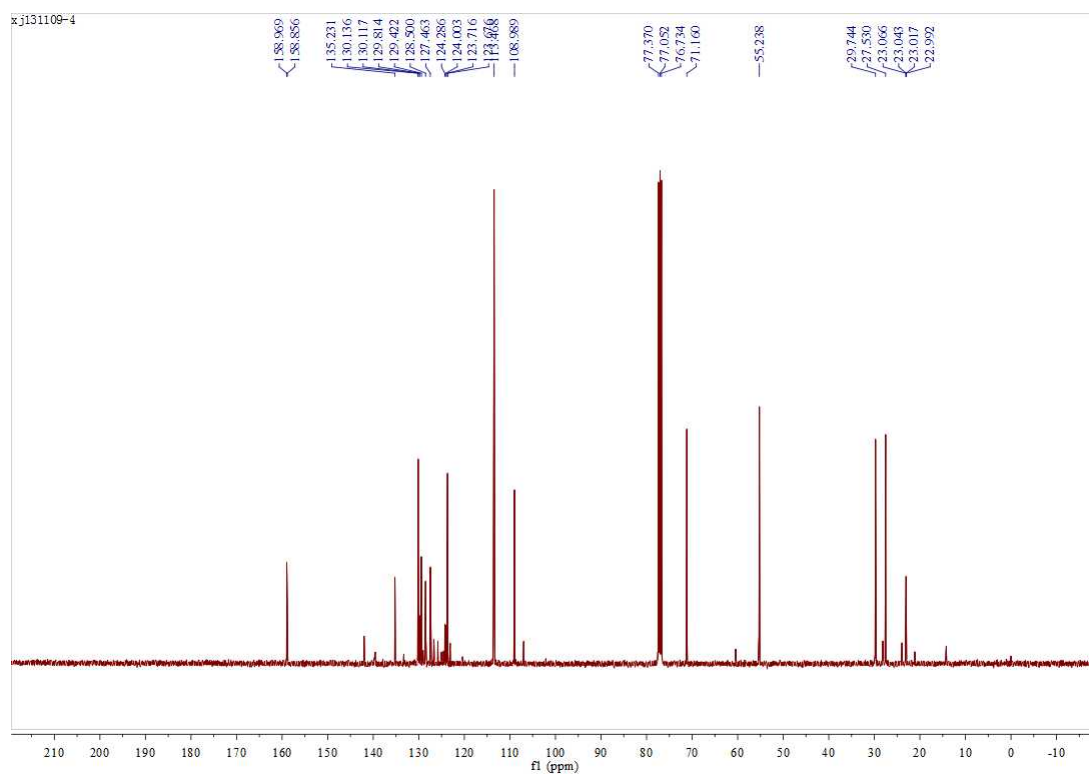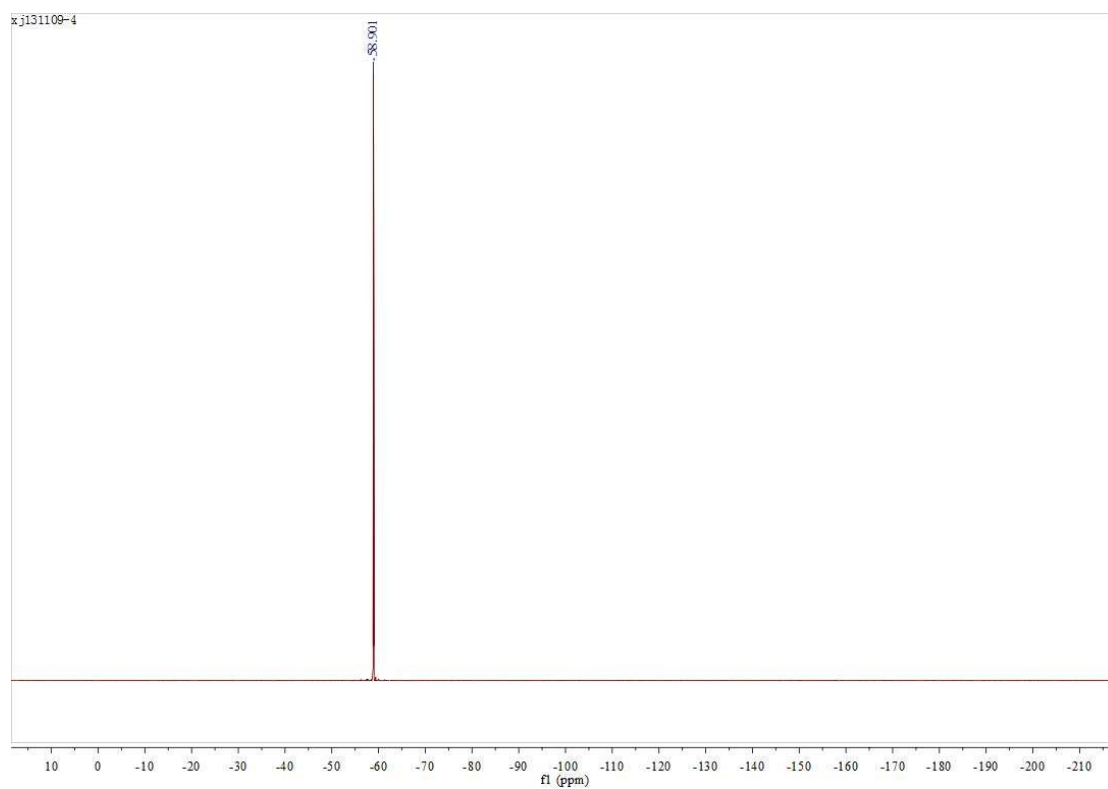

6-fluoro-4-(4-methoxyphenyl)-3-(trifluoromethyl)-1,2-dihydronaphthalene (**3e**)

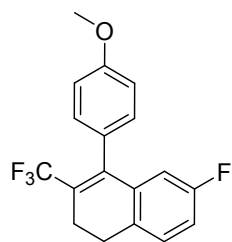

Prepared according to General Procedure C.

**<sup>1</sup>H NMR** (400 MHz, CDCl<sub>3</sub>) δ 7.14 (dd, *J* = 8.2, 5.7 Hz, 1H), 7.08 (d, *J* = 8.7 Hz, 2H), 6.94 (d, *J* = 8.7 Hz, 2H), 6.89 (td, *J* = 8.3, 2.7 Hz, 1H), 6.42 (dd, *J* = 10.4, 2.6 Hz, 1H), 3.85 (s, 3H), 2.90 (t, *J* = 8.0 Hz, 2H), 2.60 (t, *J* = 8.0 Hz, 2H).

**<sup>13</sup>C NMR** (100 MHz, CDCl<sub>3</sub>) δ 161.6 (d, *J* = 242 Hz), 159.22, 141.11, 137.10 (d, *J* = 7.4 Hz), 131.52 (d, *J* = 2.9 Hz), 130.12 (q, *J* = 1.9 Hz), 128.60, 128.42 (d, *J* = 7.7 Hz), 125.74 (q, *J* = 28.6 Hz), 124.19 (q, *J* = 272 Hz), 115.20 (d, *J* = 21.4 Hz), 114.75 (d, *J* = 23.5 Hz), 113.66, 55.23, 26.93, 22.73 (q, *J* = 2.7 Hz).

**<sup>19</sup>F NMR** (376 MHz, CDCl<sub>3</sub>) δ -59.35 (s), -115.37 – -115.70 (m).

HRMS calcd for C<sub>18</sub>H<sub>14</sub>F<sub>4</sub>O ([M]<sup>+</sup>): 322.0981; found: 322.0978.

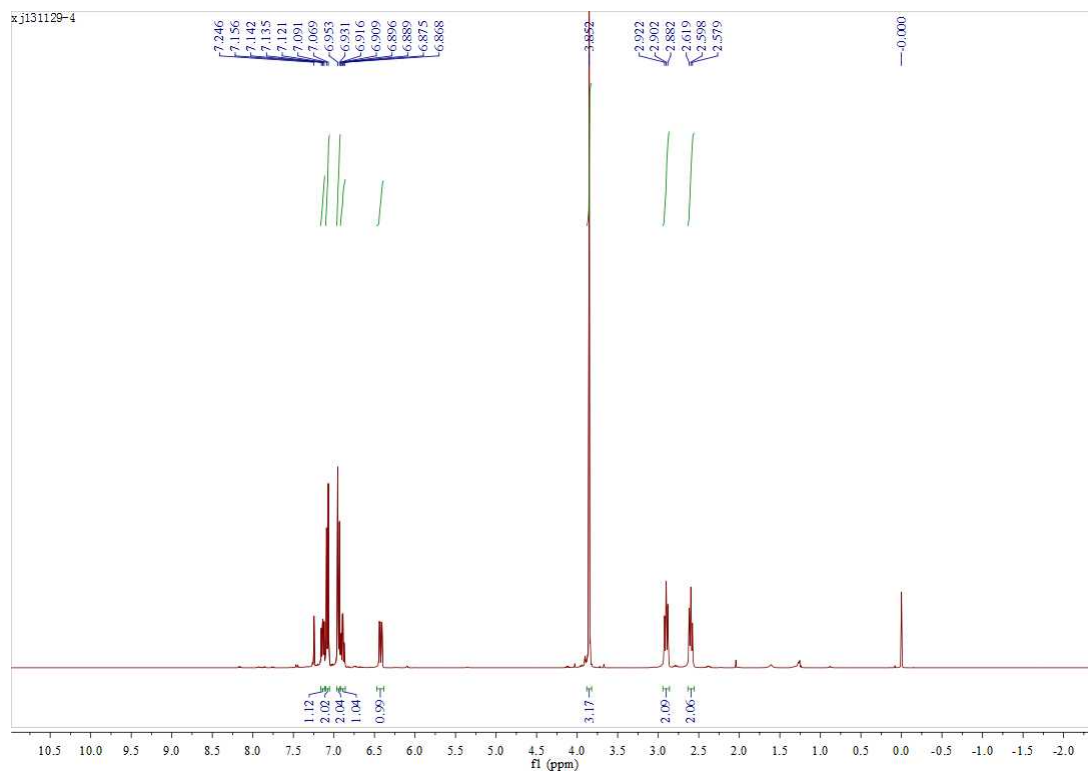

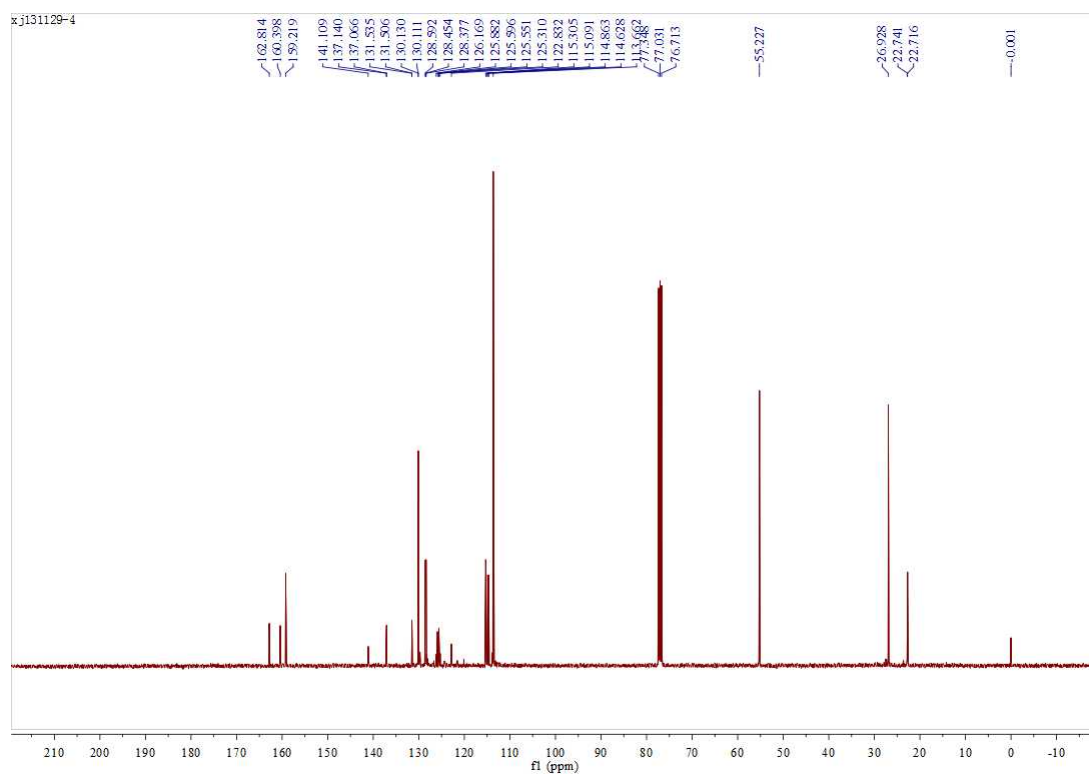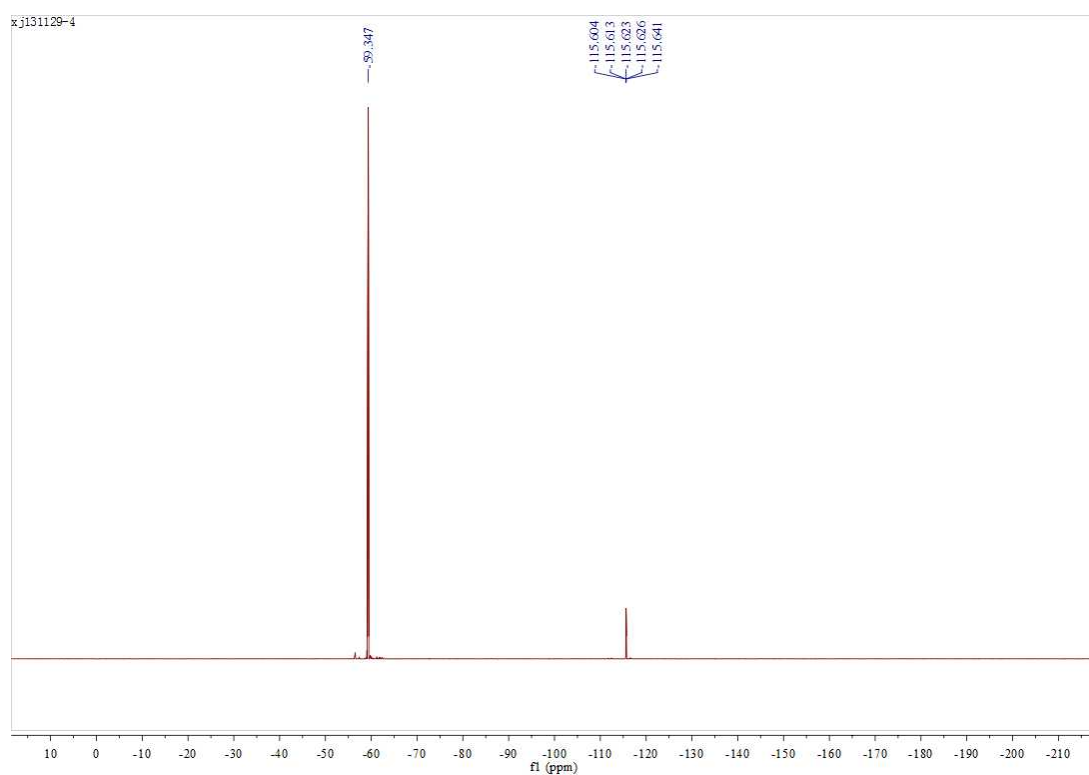



6-chloro-4-(4-methoxyphenyl)-3-(trifluoromethyl)-1,2-dihydronaphthalene (**3f**)

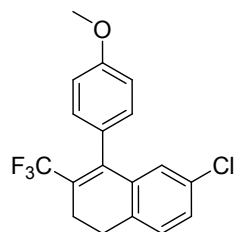

Prepared according to General Procedure C.

**<sup>1</sup>H NMR** (400 MHz, CDCl<sub>3</sub>) δ 7.17 (d, *J* = 8.0, 1H), 7.11 (d, *J* = 8.0, 1H), 7.07 (d, *J* = 8.4 Hz, 2H), 6.94 (d, *J* = 8.4 Hz, 2H), 6.68 (d, *J* = 2 Hz, 1H), 3.86 (s, 3H), 2.900 (t, *J* = 8.0, 2H), 2.59 (t, *J* = 8.0 Hz, 2H).

**<sup>13</sup>C NMR** (100 MHz, CDCl<sub>3</sub>) δ 159.23, 140.97 (q, *J* = 4.0 Hz), 136.94, 134.37, 132.37, 130.13 (q, *J* = 1.9 Hz), 128.57, 128.50, 128.37, 127.65, 125.88 (q, *J* = 28.7 Hz), 124.12 (q, *J* = 271 Hz), 113.70, 55.22, 27.12, 22.50 (q, *J* = 2.6 Hz).

**<sup>19</sup>F NMR** (376 MHz, CDCl<sub>3</sub>) δ -59.31.

HRMS calcd for C<sub>18</sub>H<sub>14</sub>ClF<sub>3</sub>O ([M]<sup>+</sup>): 338.0685; found: 338.0683.

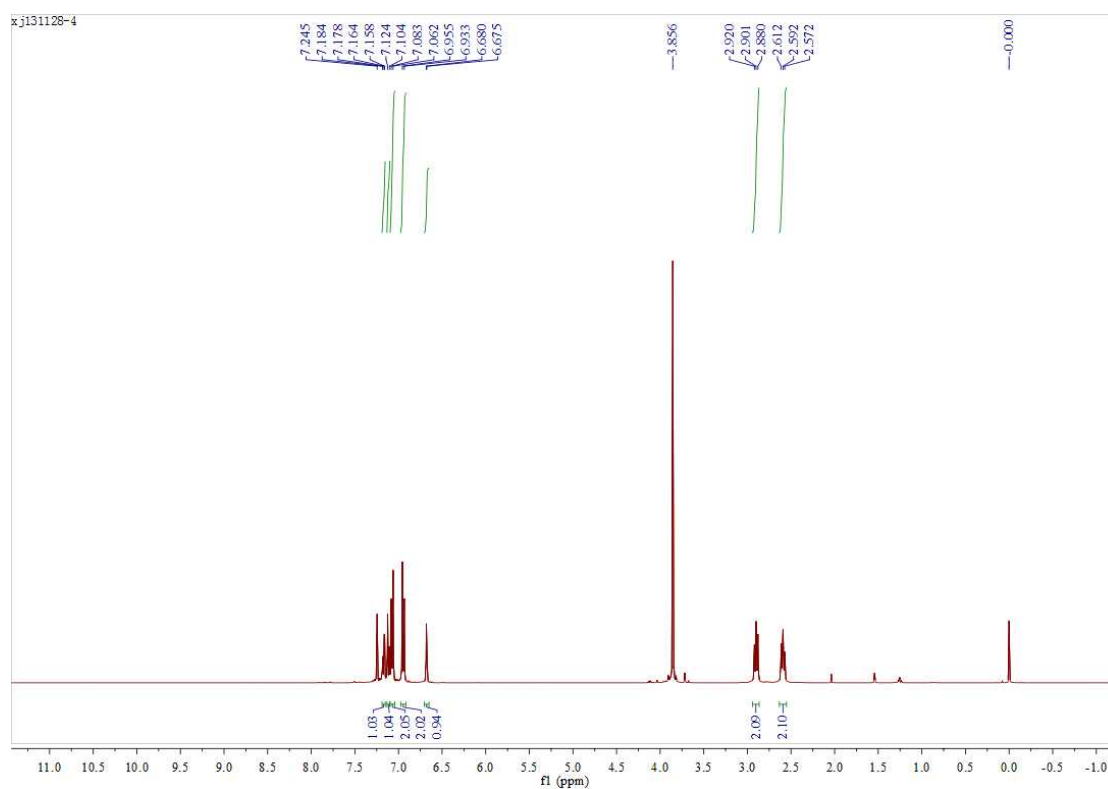

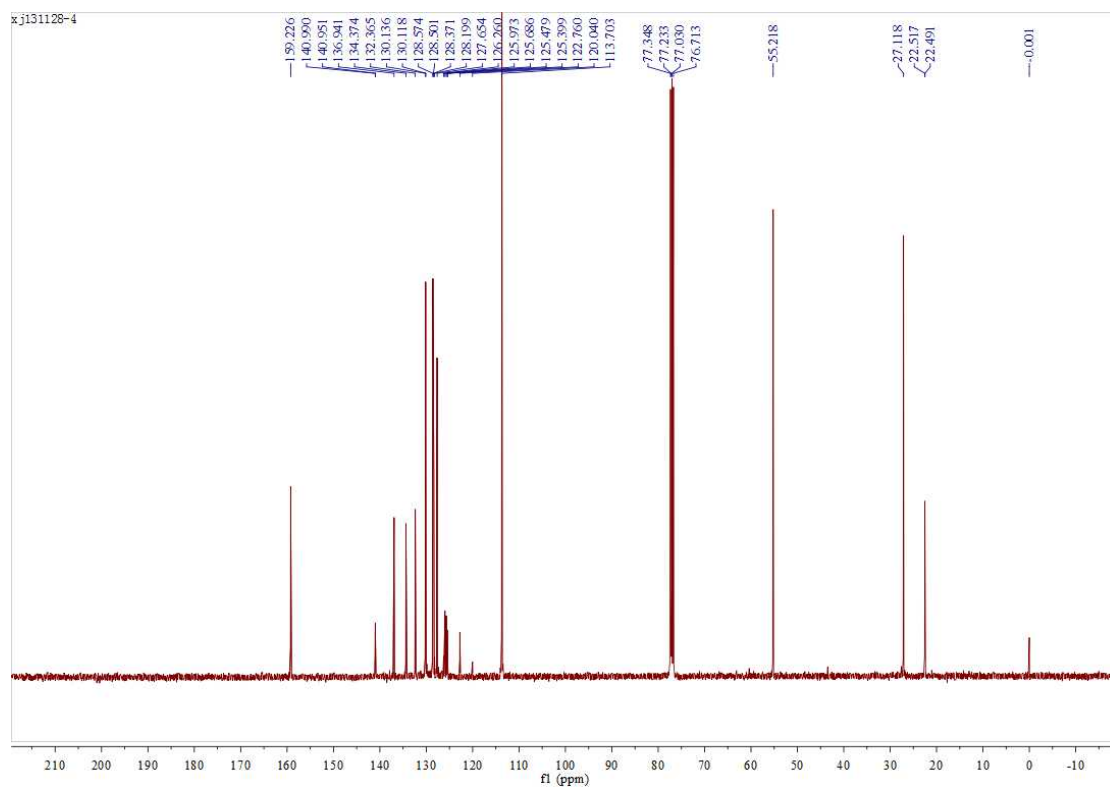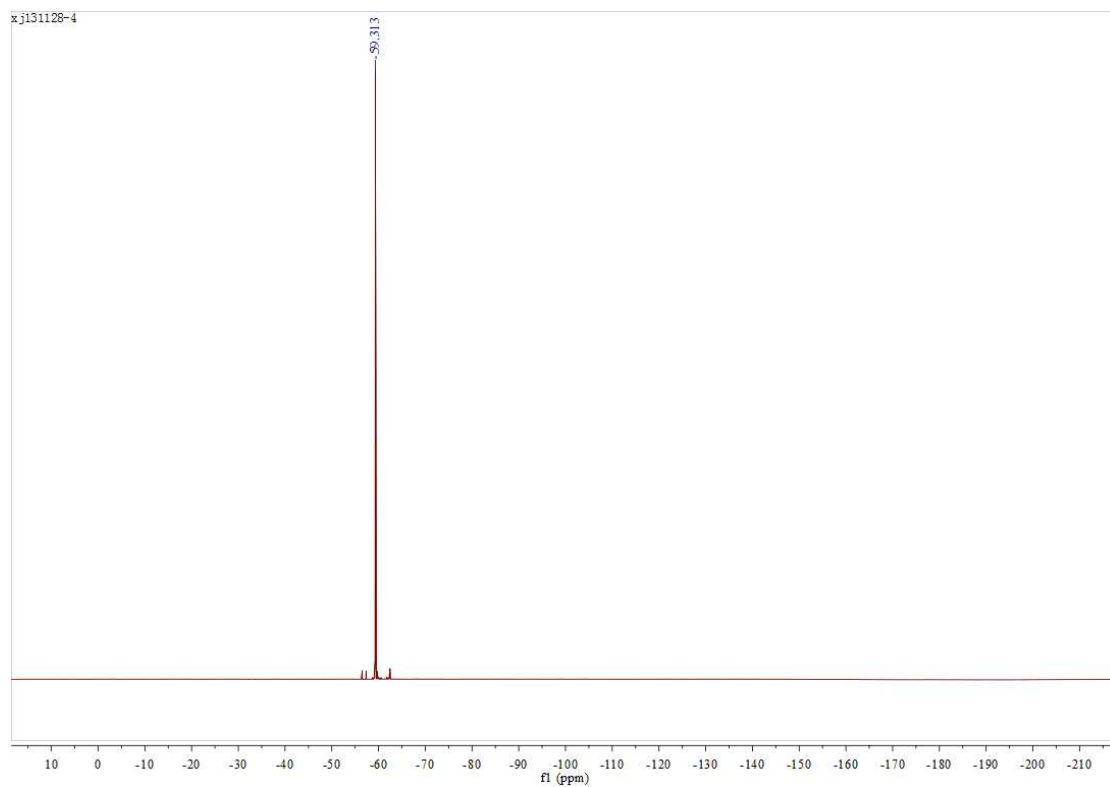

8-chloro-4-(4-methoxyphenyl)-3-(trifluoromethyl)-1,2-dihydronaphthalene (**3g**)

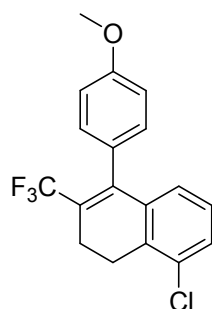

Prepared according to General Procedure **D**.

**<sup>1</sup>H NMR** (400 MHz, CDCl<sub>3</sub>) δ 7.28 (d, *J* = 8.0 Hz, 1H), 7.07 (d, *J* = 8.6 Hz, 2H), 6.99 (t, *J* = 7.9 Hz, 1H), 6.93 (d, *J* = 8.7 Hz, 2H), 6.62 (d, *J* = 7.8 Hz, 1H), 3.85 (s, 3H), 3.08 (t, *J* = 8.0 Hz, 2H), 2.61 (t, *J* = 8.0 Hz, 2H).

**<sup>13</sup>C NMR** (100 MHz, CDCl<sub>3</sub>) δ 159.16, 141.23 (q, *J* = 4.0 Hz), 137.21, 133.84, 132.93, 130.22 (q, *J* = 1.9 Hz), 129.65, 128.89, 127.00, 126.52, 125.28 (q, *J* = 28.8 Hz), 124.11 (q, *J* = 272 Hz), 113.56, 55.22, 24.15, 21.90 (q, *J* = 2.6 Hz).

**<sup>19</sup>F NMR** (376 MHz, CDCl<sub>3</sub>) δ -59.38.

HRMS calcd for C<sub>18</sub>H<sub>14</sub>ClF<sub>3</sub>O ([M]<sup>+</sup>): 338.0685; found: 338.0686.

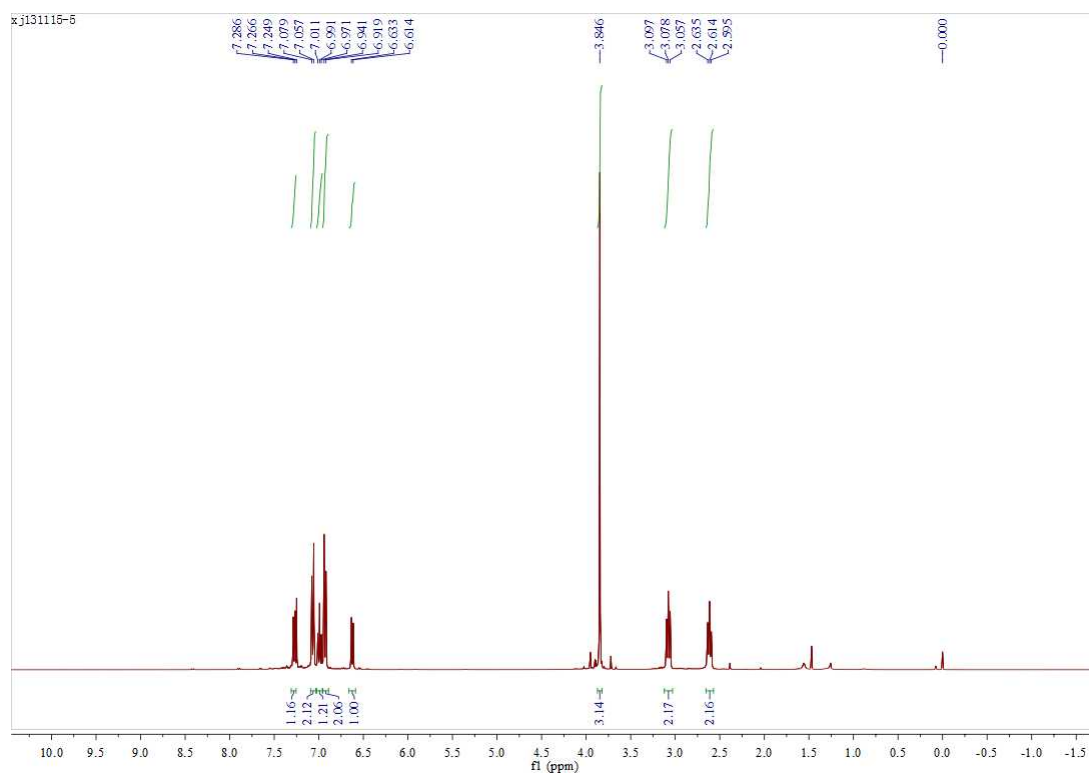

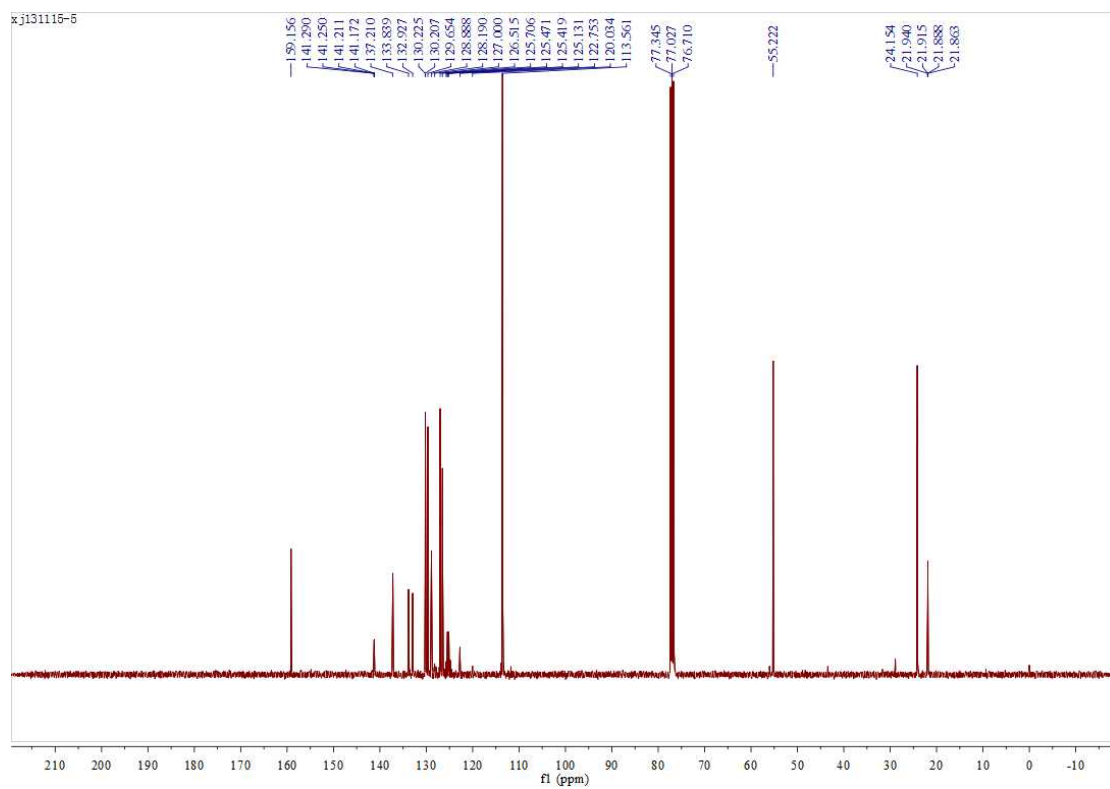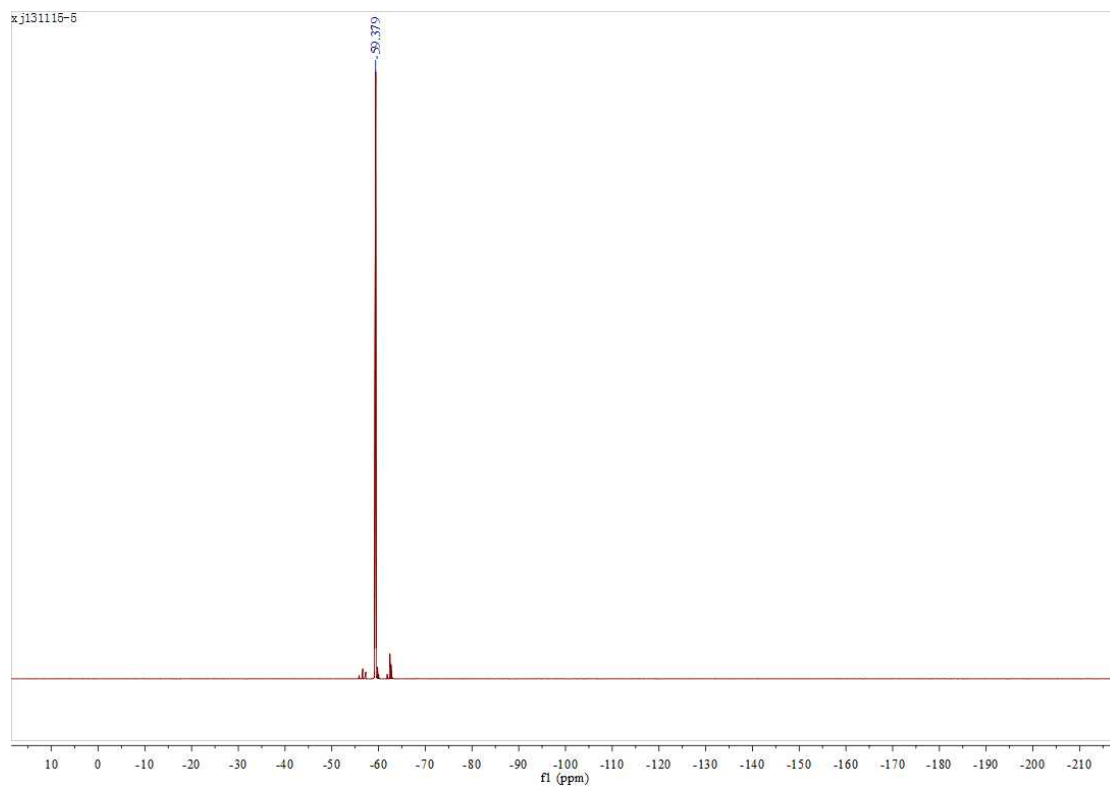

7-bromo-4-(4-methoxyphenyl)-3-(trifluoromethyl)-1,2-dihydronaphthalene (**3h**)

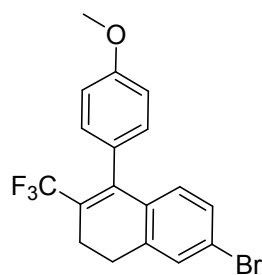

Prepared according to General Procedure C.

**<sup>1</sup>H NMR** (400 MHz, CDCl<sub>3</sub>) δ 7.34 (s, 1H), 7.18 (dd, *J* = 8.4, 1.8 Hz, 1H), 7.07 (d, *J* = 8.6 Hz, 2H), 6.93 (d, *J* = 8.6 Hz, 2H), 6.56 (d, *J* = 8.4 Hz, 1H), 3.85 (s, 3H), 2.92 (t, *J* = 8.4 Hz, 2H), 2.60 (d, *J* = 8.1 Hz, 2H).

**<sup>13</sup>C NMR** (100 MHz, CDCl<sub>3</sub>) δ 159.14, 141.11 (q, *J* = 3.9 Hz), 138.13, 134.26, 130.24, 130.14 (q, *J* = 2.0 Hz), 129.62, 129.37, 128.66, 124.19 (q, *J* = 271 Hz), 124.85 (q, *J* = 28.6 Hz), 122.86, 113.58, 55.23, 27.48, 22.39 (q, *J* = 2.7 Hz).

**<sup>19</sup>F NMR** (376 MHz, CDCl<sub>3</sub>) δ -59.21.

HRMS calcd for C<sub>18</sub>H<sub>14</sub>BrF<sub>3</sub>O ([M]<sup>+</sup>): 382.0180; found: 382.0183.

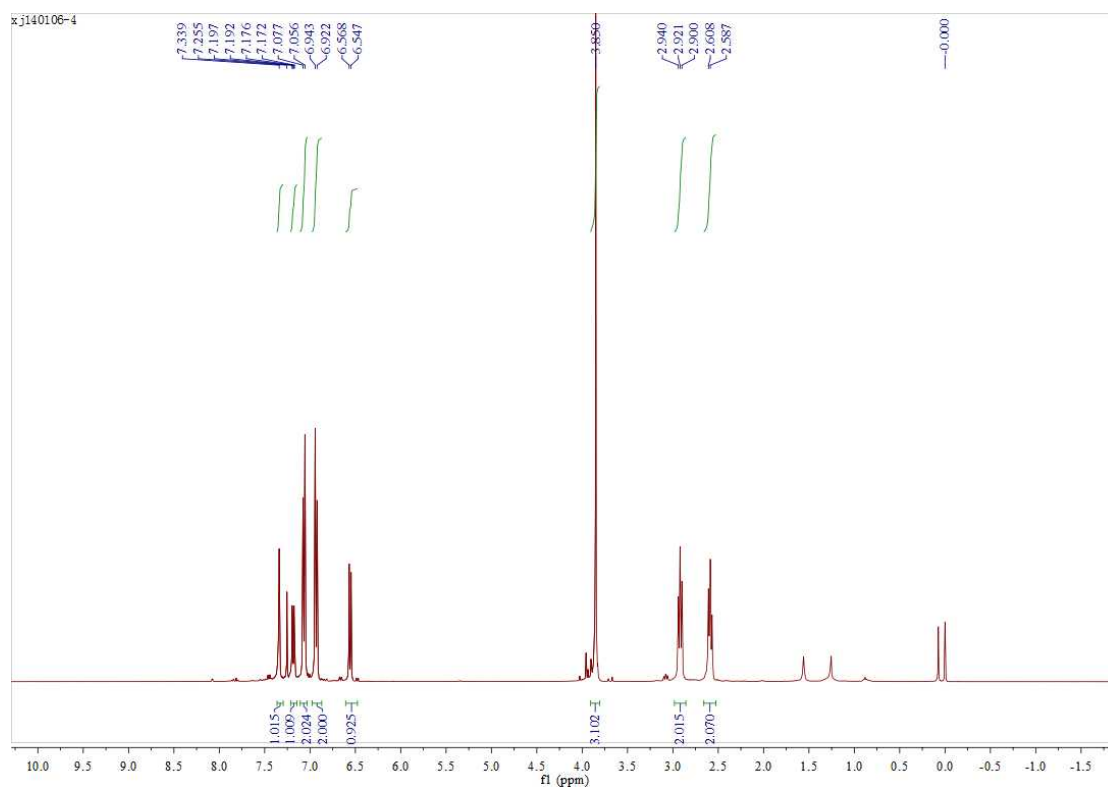

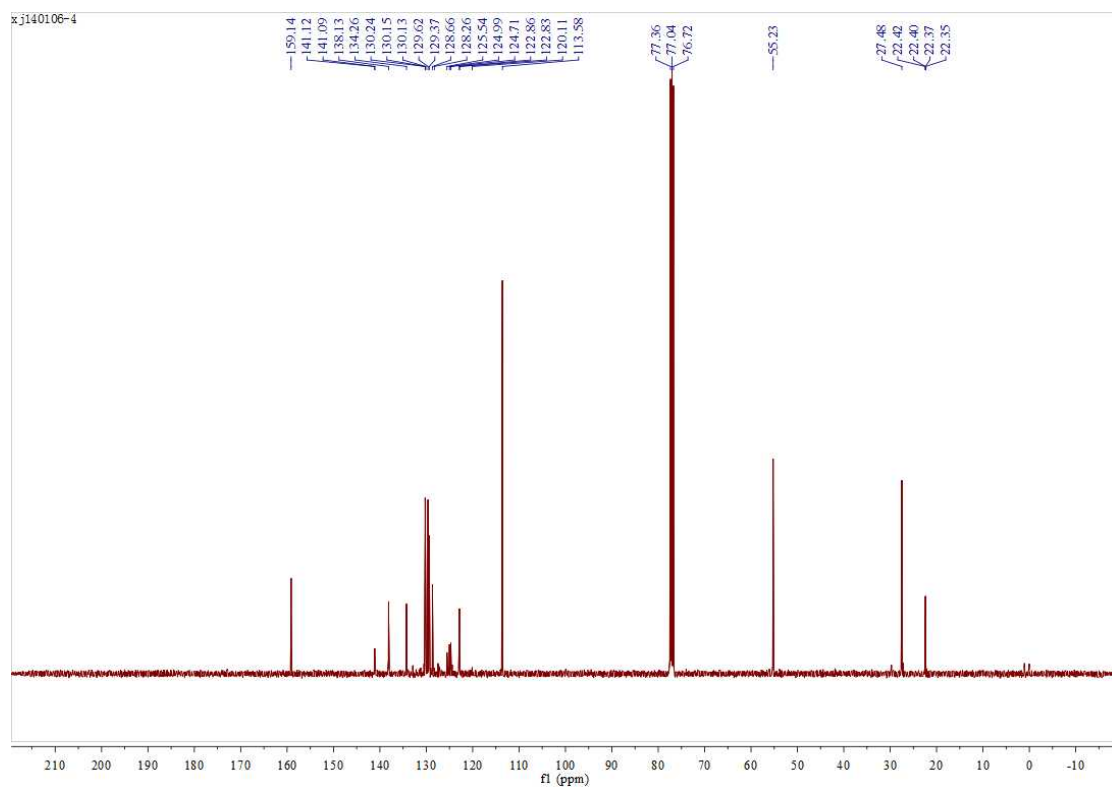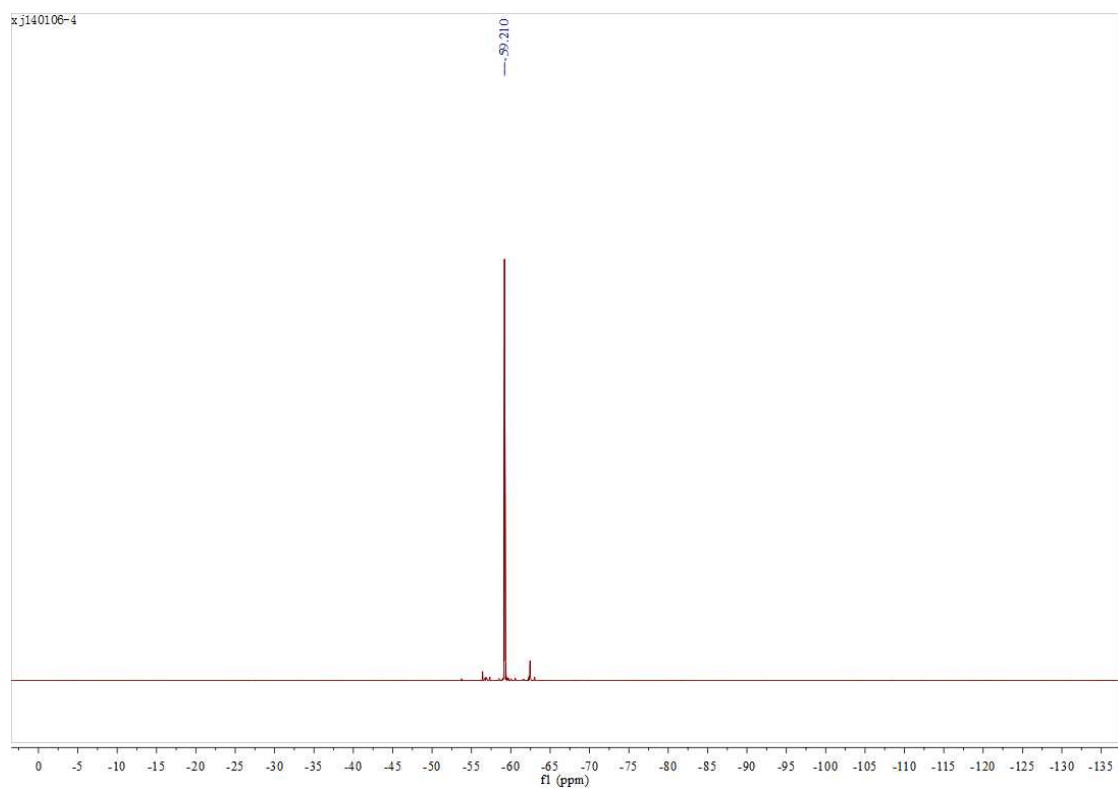

5-bromo-4-(4-methoxyphenyl)-3-(trifluoromethyl)-1,2-dihydronaphthalene (**3h'**)

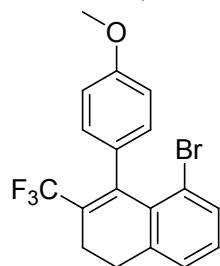

Prepared according to General Procedure C.

**<sup>1</sup>H NMR** (400 MHz, CDCl<sub>3</sub>) δ 7.38 (d, *J* = 7.9 Hz, 1H), 7.19 (d, *J* = 7.3 Hz, 1H), 7.09 (d, *J* = 8.5 Hz, 2H), 7.03 (t, *J* = 7.7 Hz, 1H), 6.84 (d, *J* = 8.7 Hz, 2H), 3.83 (s, 3H), 2.83 (t, *J* = 6.8 Hz, 2H), 2.48 (t, *J* = 6.4 Hz, 2H).

**<sup>13</sup>C NMR** (100 MHz, CDCl<sub>3</sub>) δ 159.35, 142.13, 141.88 (q, *J* = 4.2 Hz), 135.04, 134.23, 131.48 (q, *J* = 2.3 Hz), 129.72, 129.41, 127.66 (q, *J* = 29.4 Hz), 126.26, 124.15 (q, *J* = 27.1 Hz), 123.79, 112.90, 55.17, 30.00, 22.96 (q, *J* = 3.0 Hz).

**<sup>19</sup>F NMR** (376 MHz, CDCl<sub>3</sub>) δ -56.59.

HRMS calcd for C<sub>18</sub>H<sub>14</sub>BrF<sub>3</sub>O ([M]<sup>+</sup>): 382.0180; found: 382.0181.

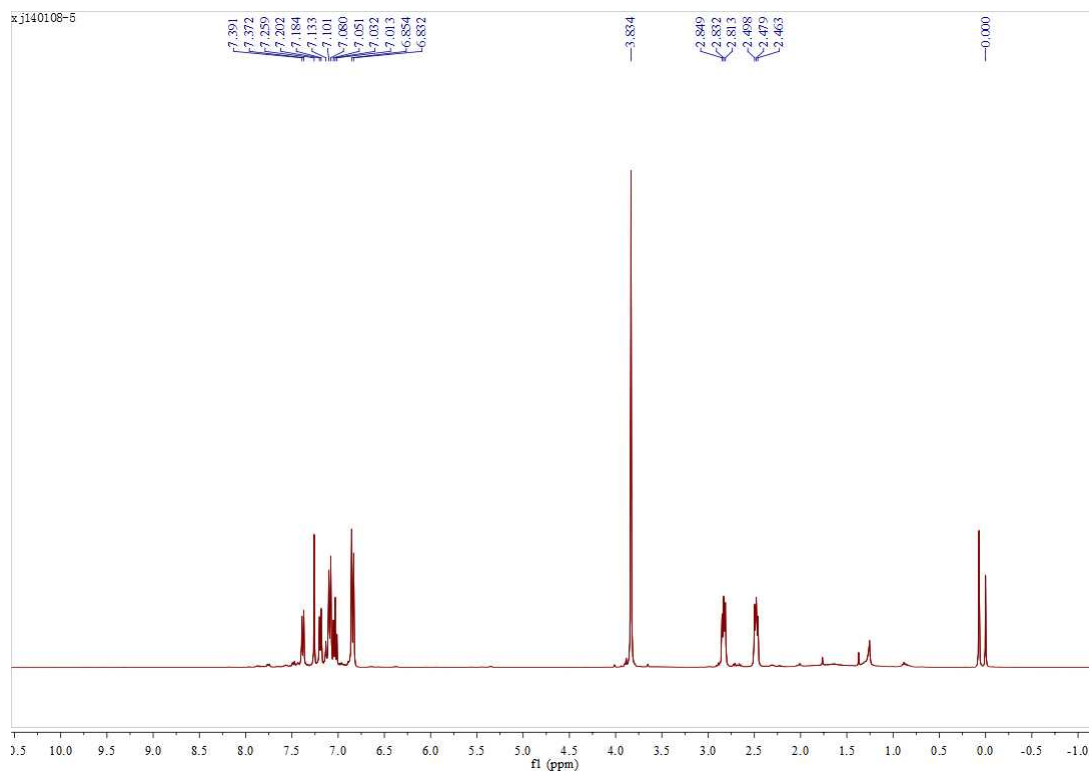

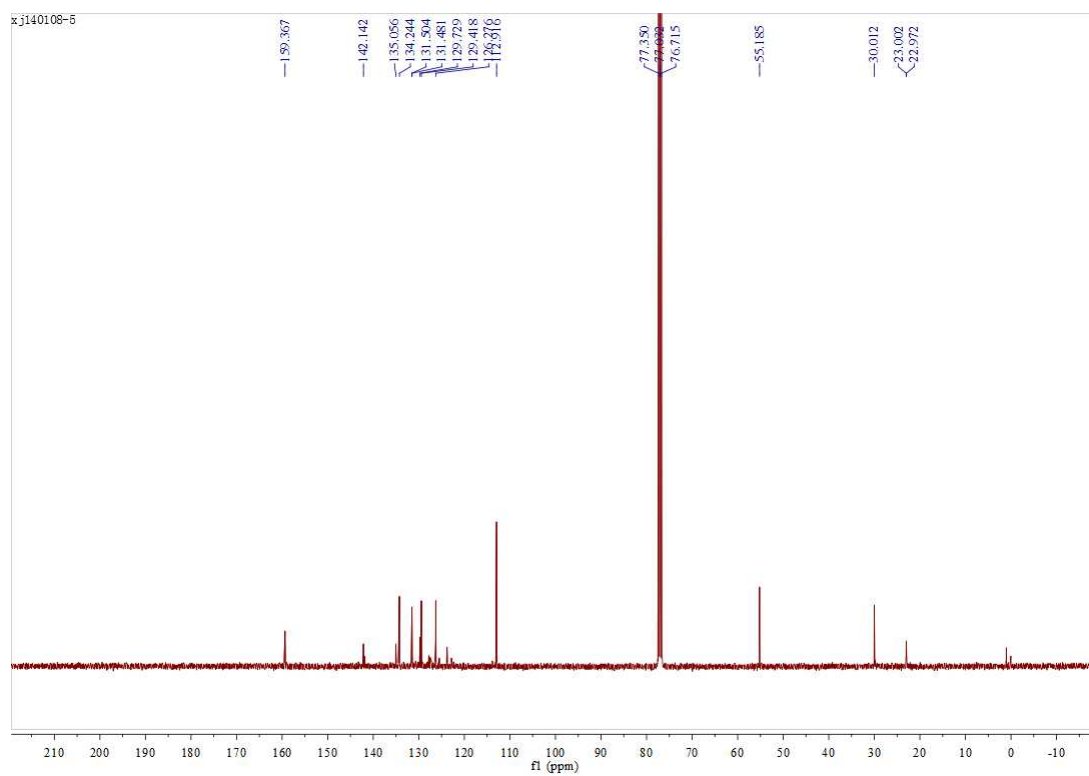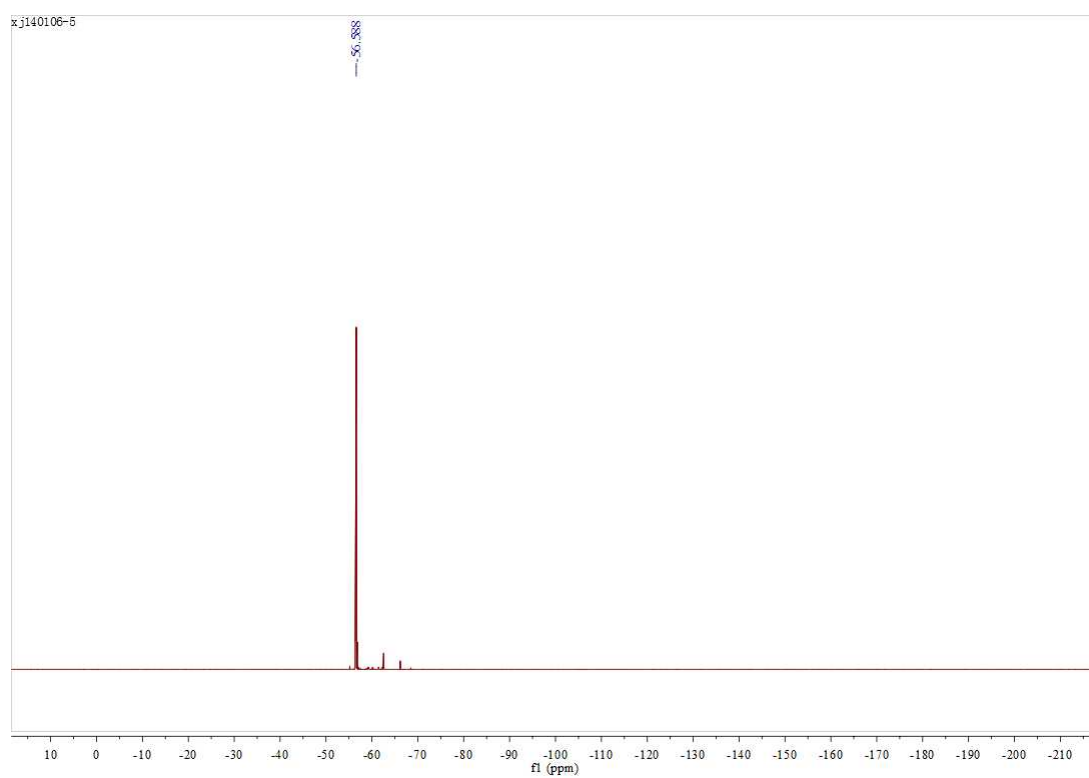



6-bromo-4-(4-methoxyphenyl)-3-(trifluoromethyl)-1,2-dihydronaphthalene (**3i**)

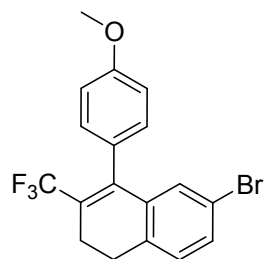

Prepared according to General Procedure C.

**<sup>1</sup>H NMR** (400 MHz, CDCl<sub>3</sub>) δ 7.32 (dd, *J* = 8.0, 2.0 Hz, 1H), 7.10 – 7.03 (m, 3H), 6.94 (d, *J* = 8.8 Hz, 2H), 6.82 (d, *J* = 1.8 Hz, 1H), 3.85 (s, 3H), 2.88 (t, *J* = 8.0 Hz, 2H), 2.59 (t, *J* = 8.0 Hz, 2H).

**<sup>13</sup>C NMR** (100 MHz, CDCl<sub>3</sub>) δ 159.22, 140.87 (q, *J* = 4.0 Hz), 137.27, 134.89, 131.55, 130.48, 130.12 (q, *J* = 1.9 Hz), 128.84, 128.30, 125.85 (q, *J* = 28.7 Hz), 124.08 (q, *J* = 272 Hz), 120.31, 113.71, 55.21, 27.19, 22.42 (q, *J* = 2.6 Hz).

**<sup>19</sup>F NMR** (376 MHz, CDCl<sub>3</sub>) δ -59.28.

HRMS calcd for C<sub>18</sub>H<sub>14</sub>BrF<sub>3</sub>O ([M]<sup>+</sup>): 382.0180; found: 382.0182.

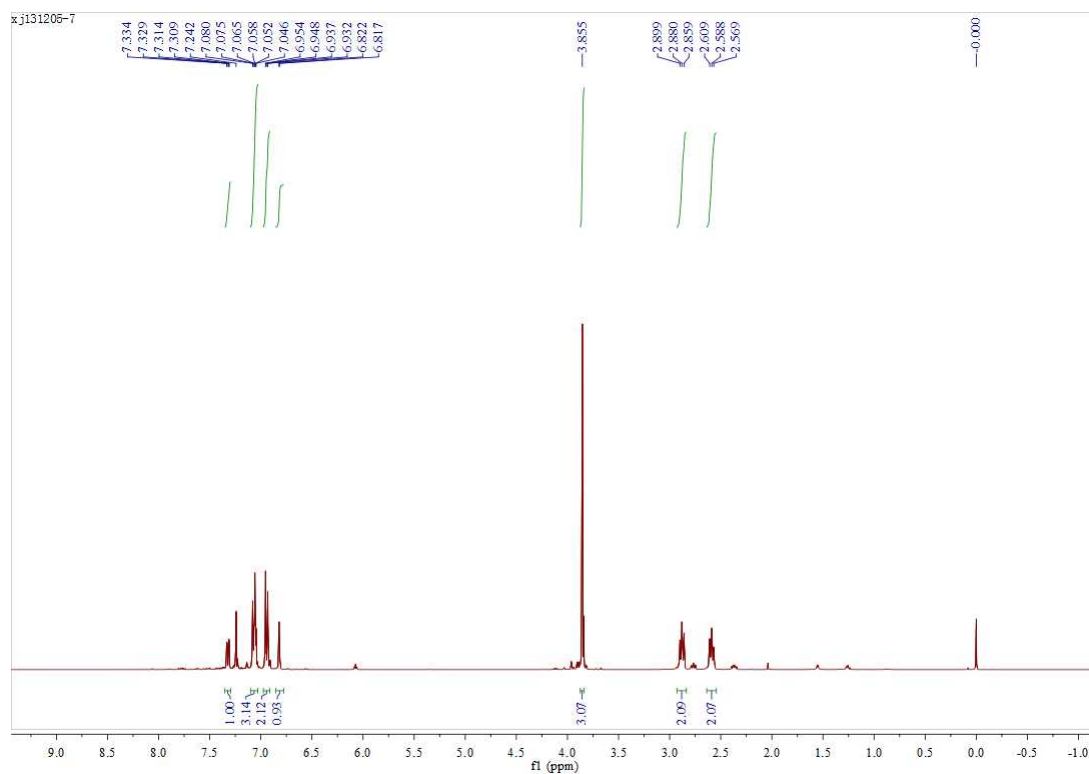

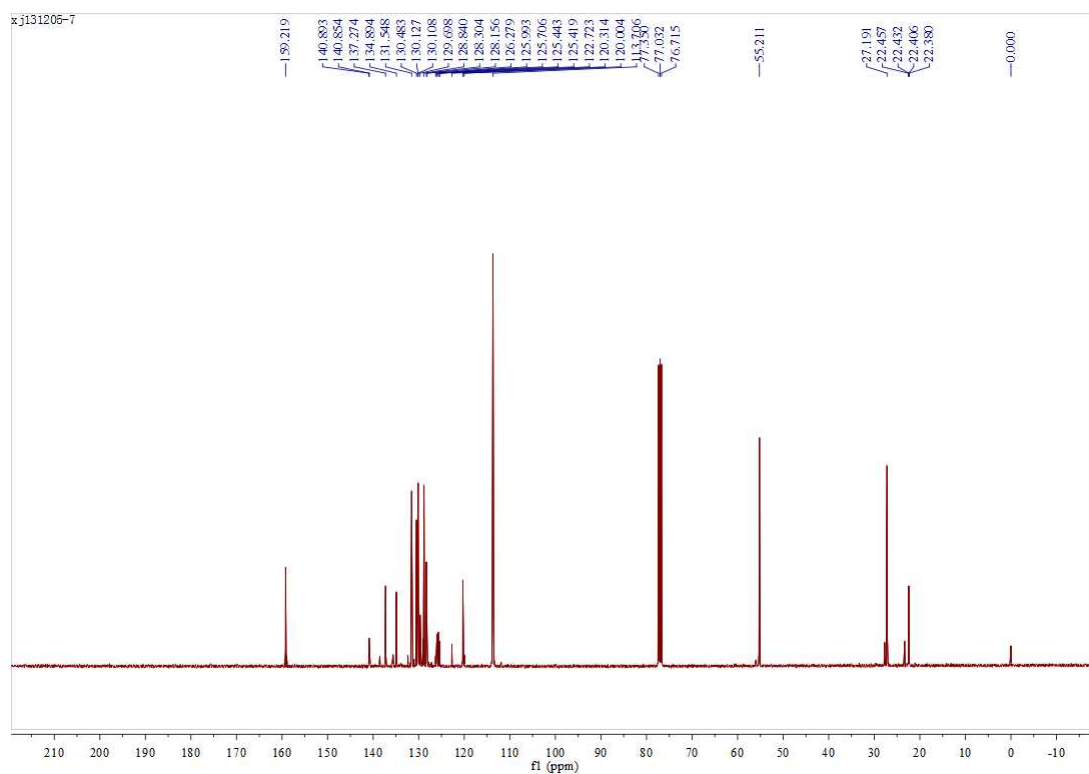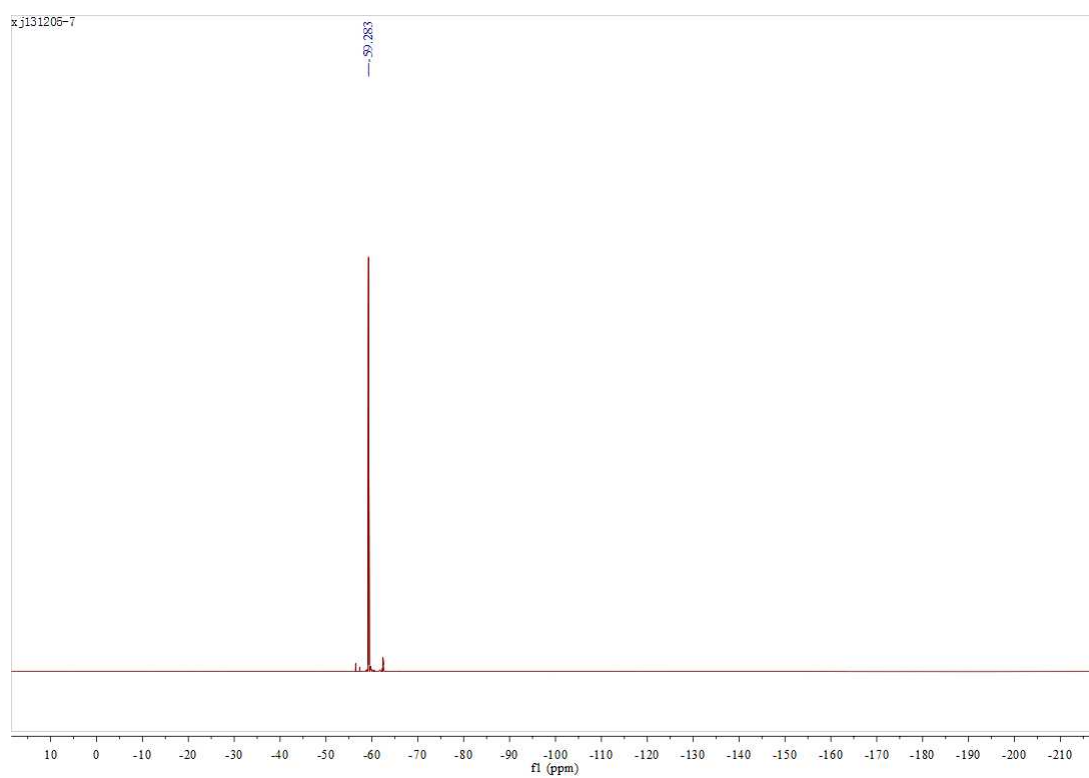

4-(4-methoxyphenyl)-3,6-bis(trifluoromethyl)-1,2-dihydronaphthalene (**3j**)

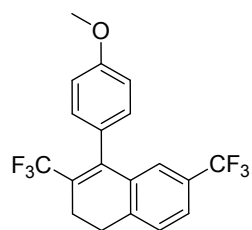

Prepared according to General Procedure E.

**<sup>1</sup>H NMR** (400 MHz, CDCl<sub>3</sub>) δ 7.46 (d, *J* = 8.4 Hz, 1H), 7.31 (d, *J* = 7.8 Hz, 1H), 7.09 (d, *J* = 8.6 Hz, 2H), 6.96 (m, 3H), 3.87 (s, 3H), 3.00 (t, *J* = 8.0 Hz, 2H), 2.63 (t, *J* = 8.0 Hz, 2H).

**<sup>13</sup>C NMR** (100 MHz, CDCl<sub>3</sub>) δ 159.31, 140.93 (q, *J* = 4.2 Hz), 139.93, 135.98, 130.14 (q, *J* = 1.9 Hz), 129.17 (q, *J* = 32.3 Hz), 128.06, 127.71, 126.12 (q, *J* = 28.8 Hz), 125.40 (q, *J* = 3.7 Hz), 124.28 (q, *J* = 3.6 Hz), 121.32 (q, *J* = 272 Hz), 121.23 (q, *J* = 272 Hz), 113.78, 55.23, 27.65, 22.23 (q, *J* = 2.5 Hz).

**<sup>19</sup>F NMR** (376 MHz, CDCl<sub>3</sub>) δ -59.42, -62.59.

HRMS calcd for C<sub>19</sub>H<sub>14</sub>F<sub>6</sub>O ([M]<sup>+</sup>): 372.0949; found: 372.0946.

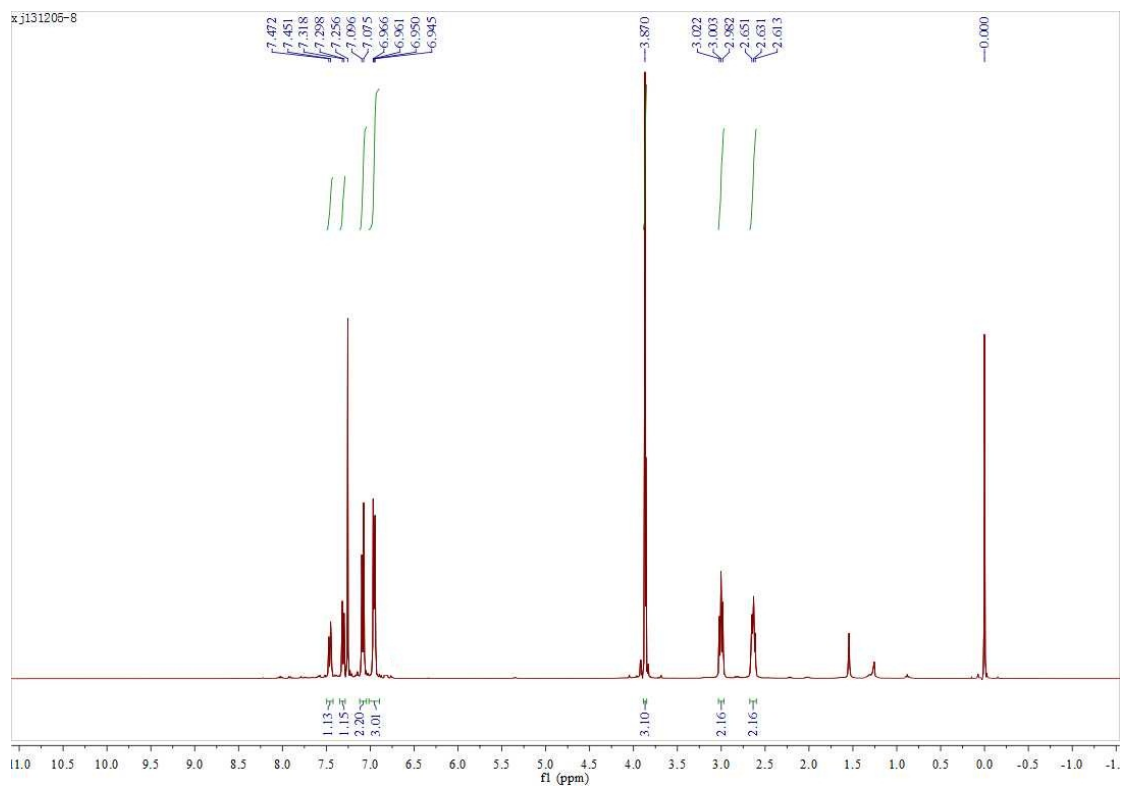

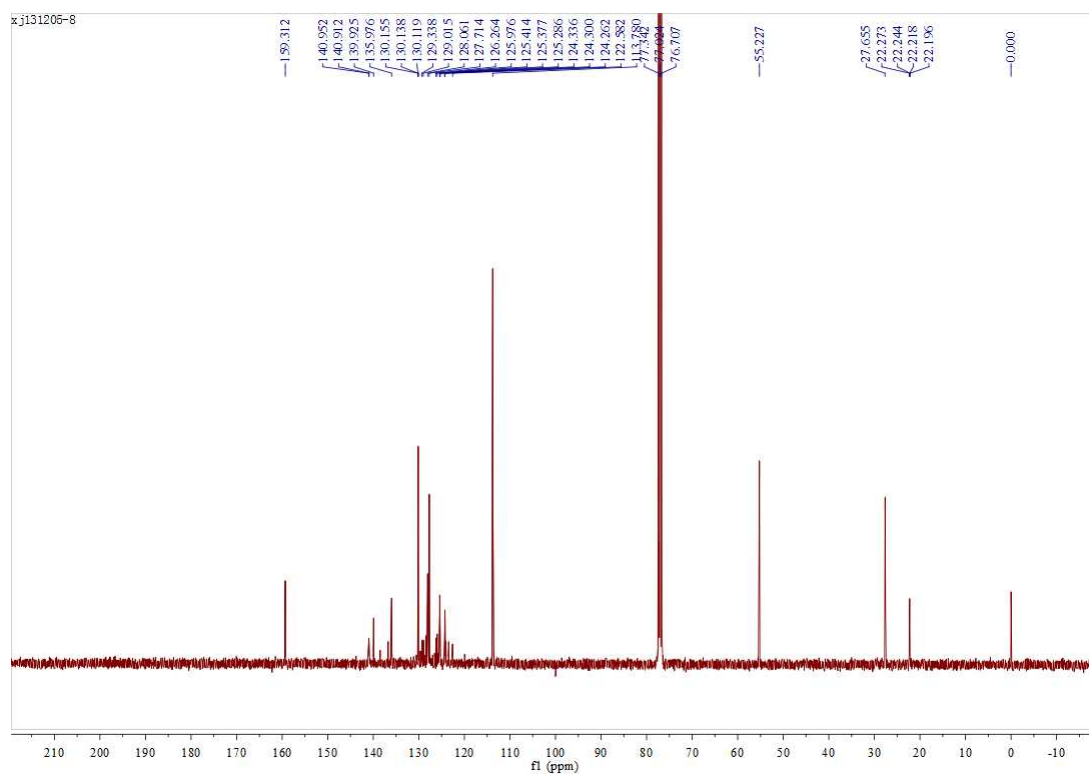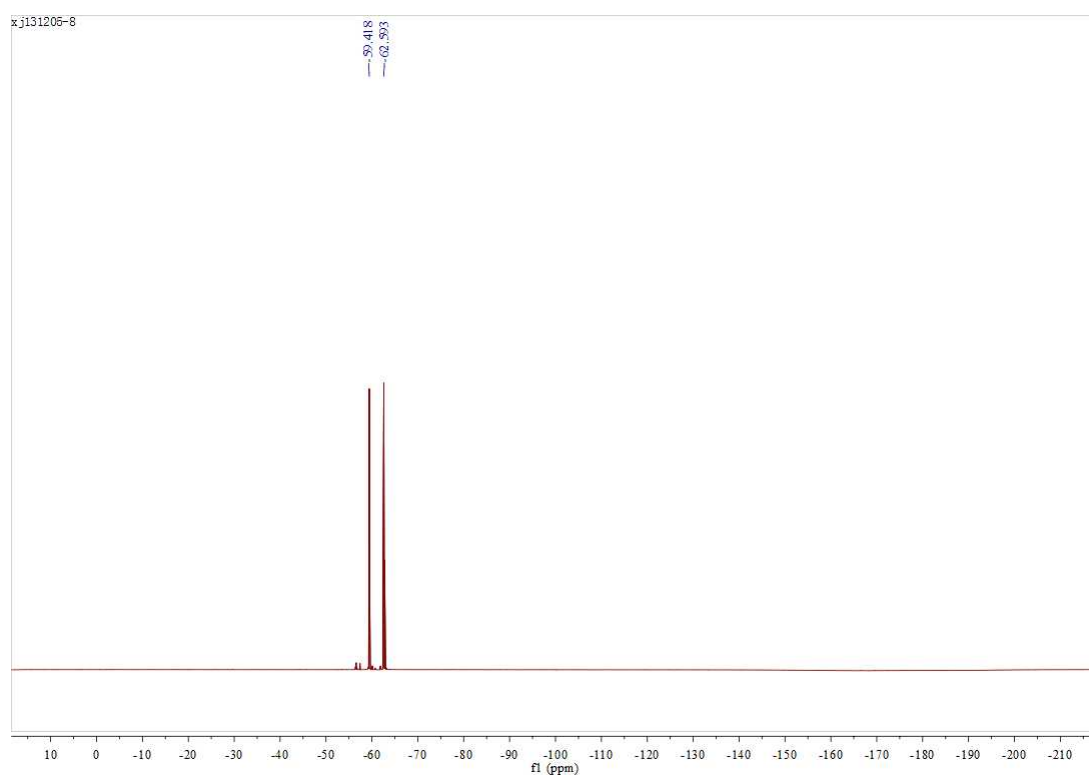

4-(4-methoxyphenyl)-3,7-bis(trifluoromethyl)-1,2-dihydronaphthalene (**3k**)

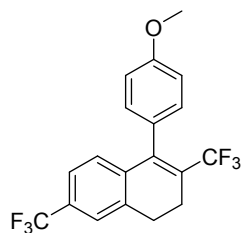

Prepared according to General Procedure E.

**<sup>1</sup>H NMR** (400 MHz, CDCl<sub>3</sub>) δ 7.45 (s, 1H), 7.31 (d, *J* = 8.1 Hz, 1H), 7.08 (d, *J* = 8.6 Hz, 2H), 6.95 (d, *J* = 8.6 Hz, 2H), 6.82 (d, *J* = 8.2 Hz, 1H), 3.86 (s, 3H), 3.00 (t, *J* = 7.9 Hz, 2H), 2.64 (t, *J* = 7.9 Hz, 2H).

**<sup>13</sup>C NMR** (100 MHz, CDCl<sub>3</sub>) δ 159.29, 140.88 (q, *J* = 5.0 Hz), 138.49, 136.73, 130.42 (q, *J* = 33.1 Hz), 130.14 (q, *J* = 1.8 Hz), 128.41, 127.98, 126.82 (q, *J* = 29.0 Hz), 124.03 (q, *J* = 3.6 Hz), 123.98 (q, *J* = 272 Hz), 123.92 (q, *J* = 271 Hz), 123.45 (q, *J* = 4.0 Hz), 113.68, 55.23, 27.53, 22.31 (q, *J* = 2.5 Hz).

**<sup>19</sup>F NMR** (376 MHz, CDCl<sub>3</sub>) δ -59.49, -62.75.

HRMS calcd for C<sub>19</sub>H<sub>14</sub>F<sub>6</sub>O ([M]<sup>+</sup>): 372.0949; found: 372.0954.

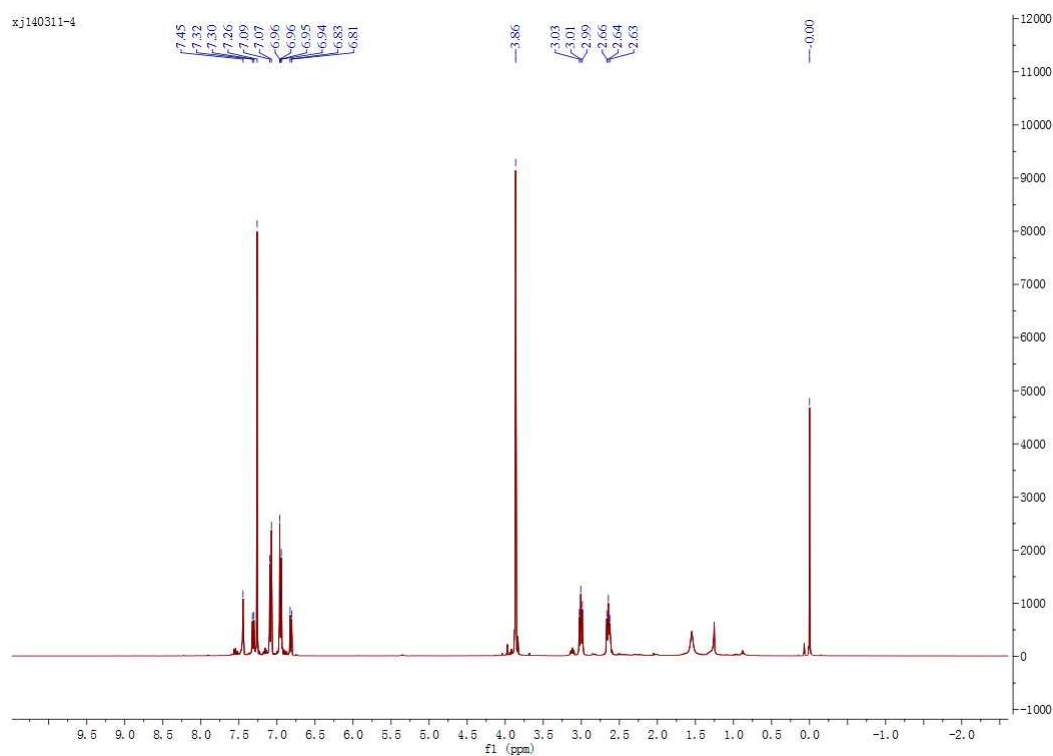

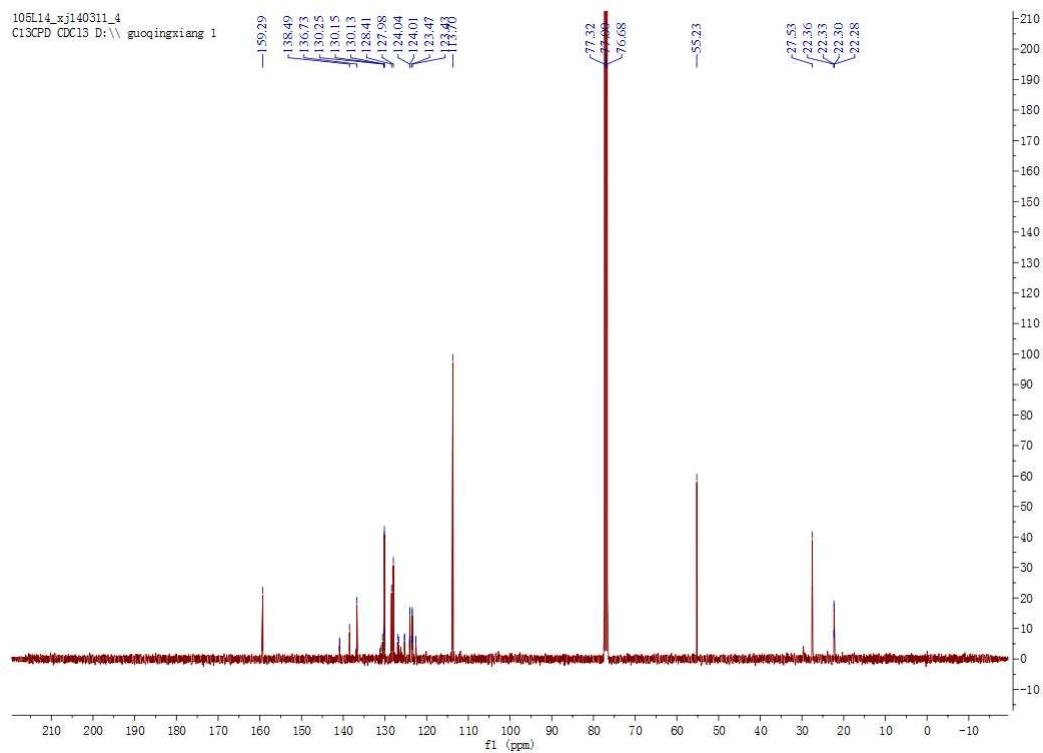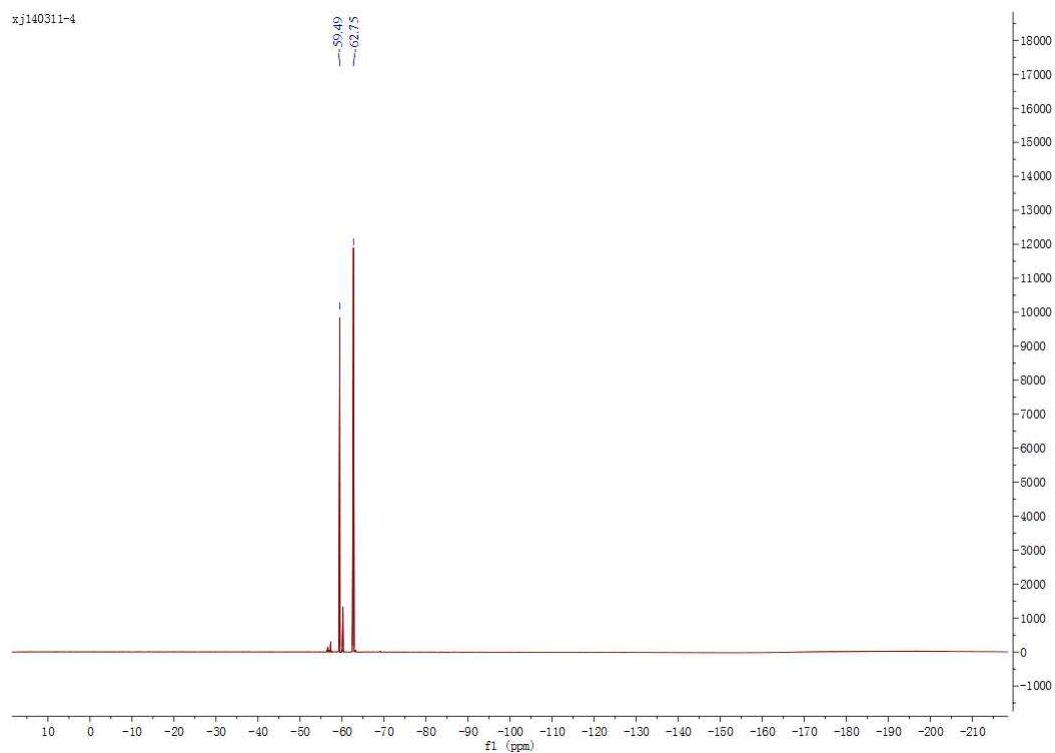

4-(4-methoxyphenyl)-3-(trifluoromethyl)-2H-chromene (**31**)

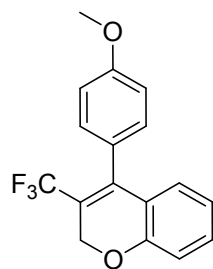

Prepared according to General Procedure E.

**<sup>1</sup>H NMR** (400 MHz, CDCl<sub>3</sub>) δ 7.23 (dd, *J* = 11.1, 4.5 Hz, 1H), 7.13 (d, *J* = 8.8 Hz, 2H), 7.00 – 6.90 (m, 3H), 6.84 (t, *J* = 7.7 Hz, 1H), 6.73 (d, *J* = 7.8, 1H), 4.89 (s, 2H), 3.86 (s, 3H).

**<sup>13</sup>C NMR** (100 MHz, CDCl<sub>3</sub>) δ 159.53, 154.57, 140.44 (q, *J* = 4.1 Hz), 131.26, 130.11 (q, *J* = 1.7 Hz), 128.12, 126.62, 123.99, 122.82 (q, *J* = 271 Hz), 121.79, 117.31 (q, *J* = 29.6 Hz), 116.11, 113.62, 63.19 (q, *J* = 3.7 Hz), 55.25.

**<sup>19</sup>F NMR** (376 MHz, CDCl<sub>3</sub>) δ -59.02.

HRMS calcd for C<sub>17</sub>H<sub>13</sub>F<sub>3</sub>O<sub>2</sub> ([M]<sup>+</sup>): 306.0868; found: 306.0871.

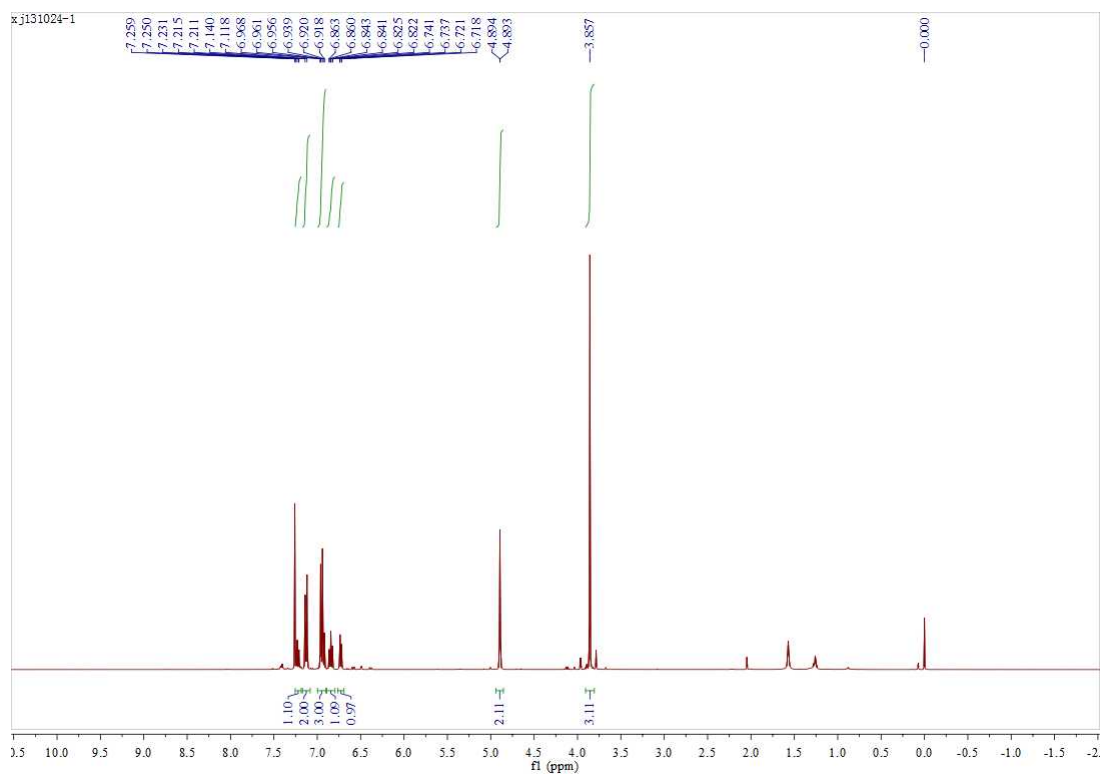

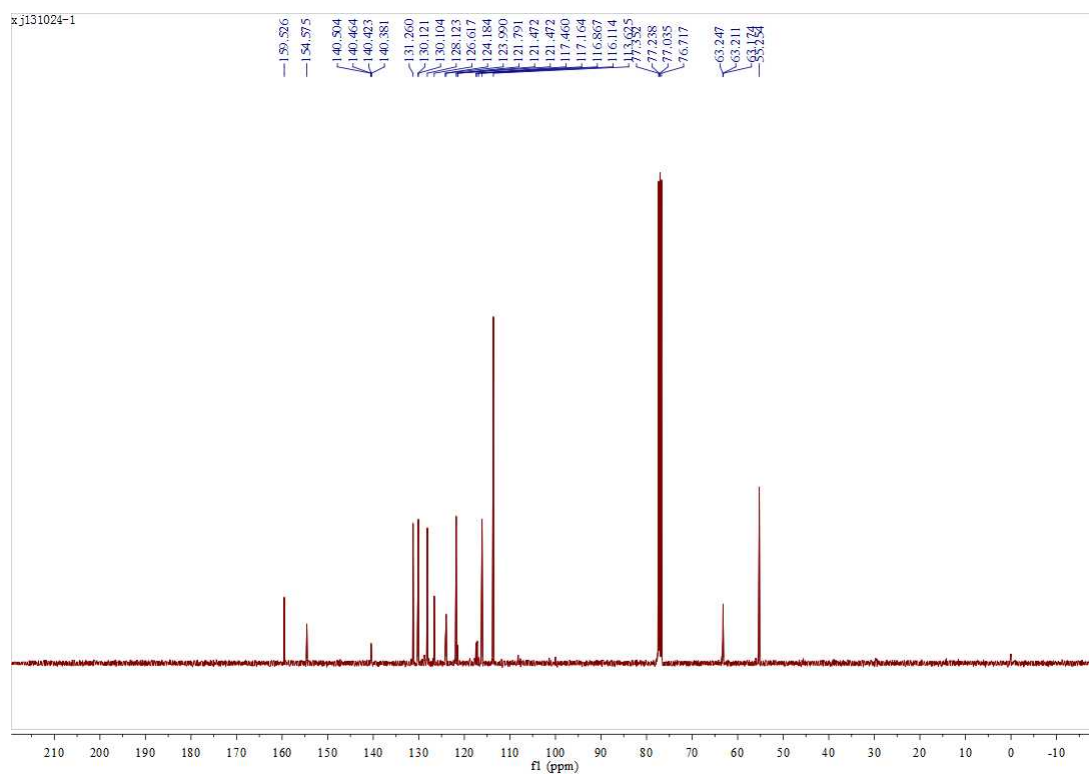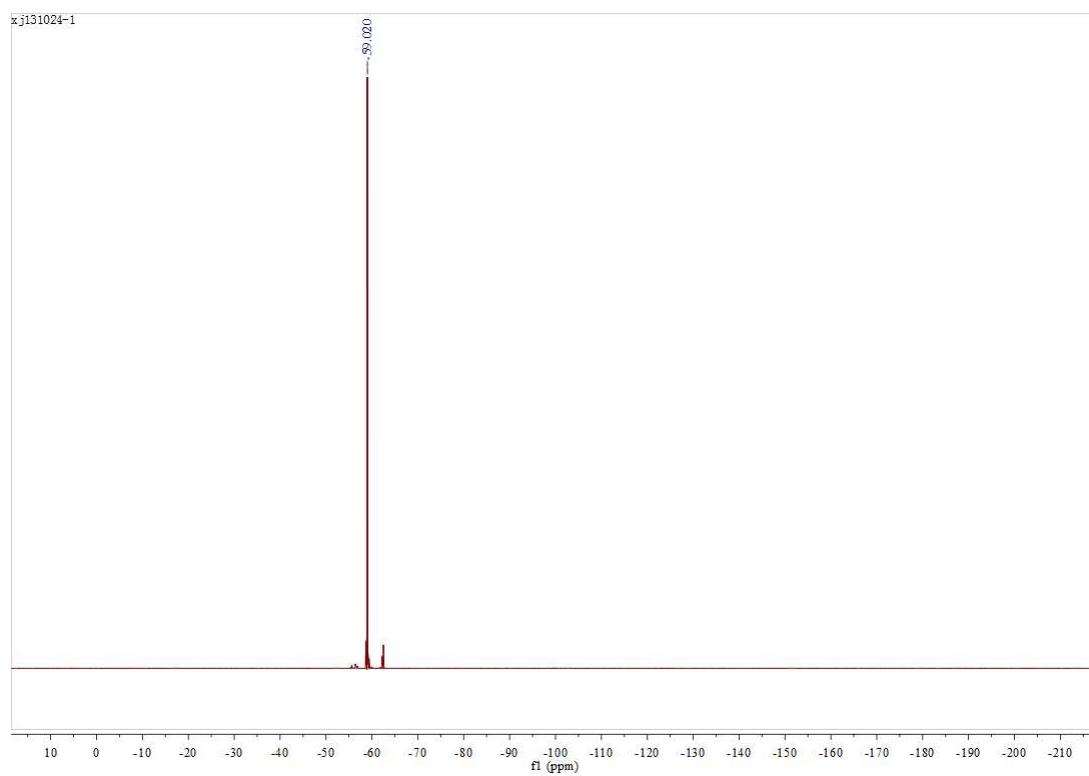



6-methoxy-4-(4-methoxyphenyl)-3-(trifluoromethyl)-2H-chromene (**3m**)

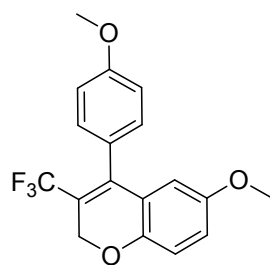

Prepared according to General Procedure E.

**<sup>1</sup>H NMR** (400 MHz, CDCl<sub>3</sub>) δ 7.13 (d, *J* = 8.6 Hz, 2H), 6.94 (d, *J* = 8.7 Hz, 2H), 6.88 (d, *J* = 8.8 Hz, 1H), 6.79 (dd, *J* = 8.8, 2.9 Hz, 1H), 6.28 (d, *J* = 2.9 Hz, 1H), 4.83 (s, 2H), 3.85 (s, 3H), 3.61 (s, 3H).

**<sup>13</sup>C NMR** (100 MHz, CDCl<sub>3</sub>) δ 159.54, 154.26, 148.55, 140.44 (q, *J* = 4.0 Hz), 130.10 (q, *J* = 1.7 Hz), 126.53, 124.75, 122.85 (q, *J* = 271 Hz), 118.17 (q, *J* = 29.5 Hz), 116.66, 116.38, 113.65, 113.38, 63.28 (q, *J* = 3.6 Hz), 55.66, 55.24.

**<sup>19</sup>F NMR** (376 MHz, CDCl<sub>3</sub>) δ -58.97.

HRMS calcd for C<sub>18</sub>H<sub>15</sub>F<sub>3</sub>O<sub>3</sub> ([M]<sup>+</sup>): 336.0973; found: 336.0975.

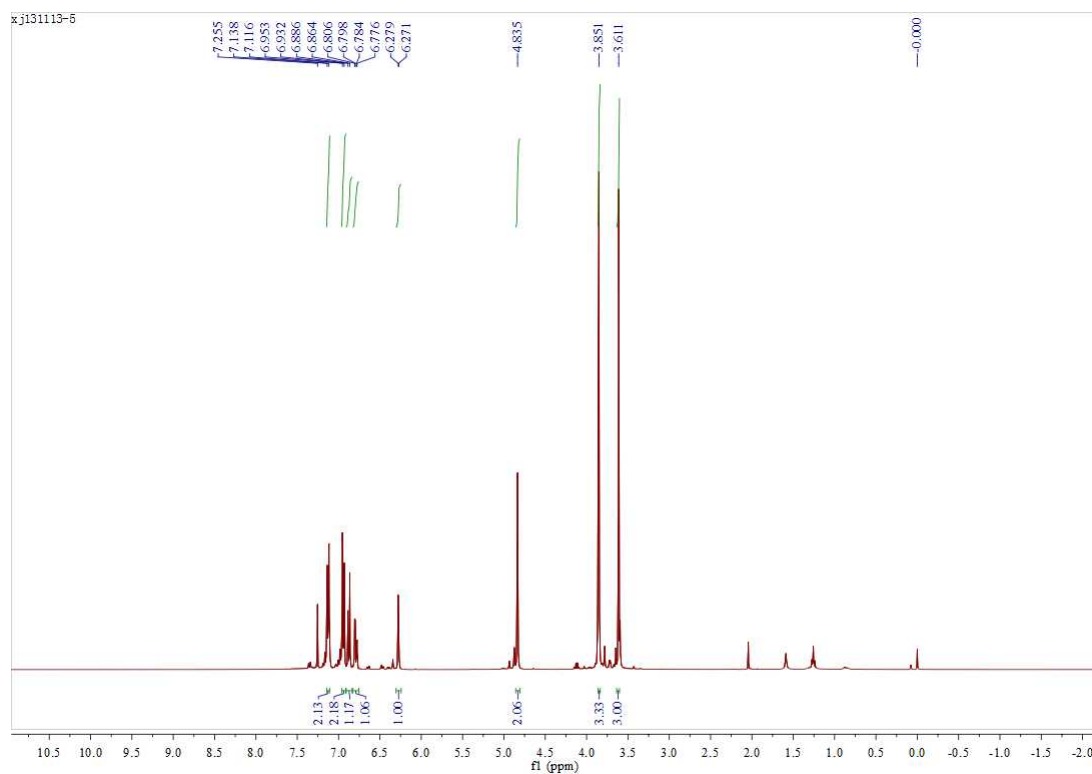

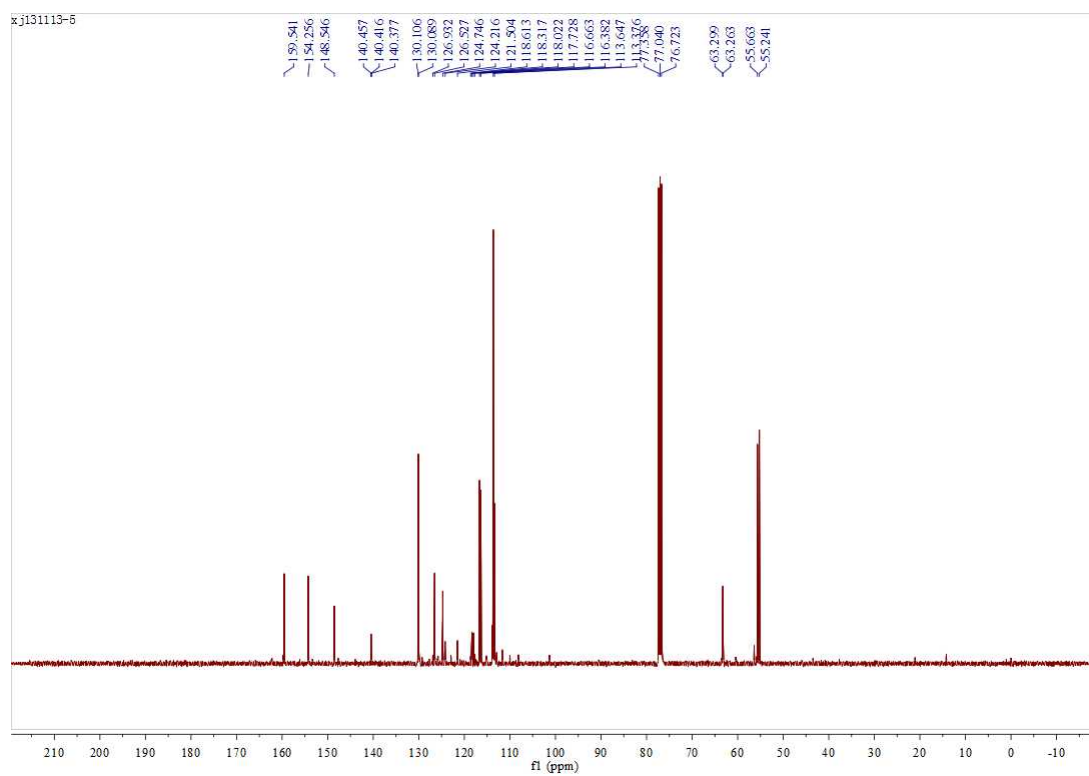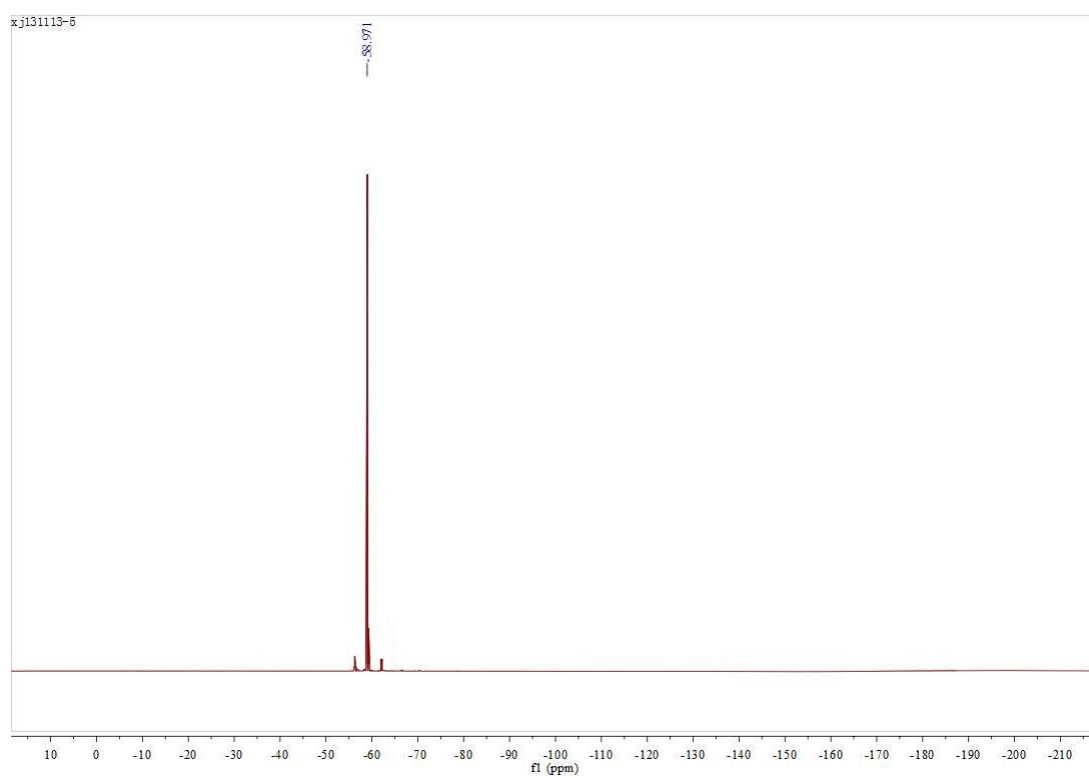

7-methoxy-4-(4-methoxyphenyl)-3-(trifluoromethyl)-2H-chromene (3n)

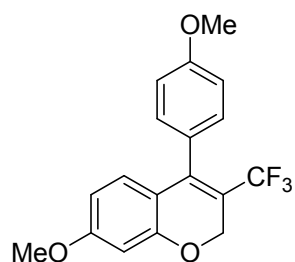

Prepared according to General Procedure E.

$^1\text{H}$  NMR (400 MHz,  $\text{CDCl}_3$ )  $\delta$  7.12 (d,  $J = 8.7$  Hz, 2H), 6.93 (d,  $J = 8.7$  Hz, 2H), 6.64 (d,  $J = 8.7$  Hz, 1H), 6.48 (d,  $J = 2.5$  Hz, 1H), 6.39 (dd,  $J = 8.7, 2.5$  Hz, 1H), 4.87 (s, 2H), 3.85 (s, 3H), 3.79 (s, 3H).

$^{13}\text{C}$  NMR (100 MHz,  $\text{CDCl}_3$ )  $\delta$  162.22, 159.46, 156.11, 140.53 (q,  $J = 4.1$  Hz), 130.09 (q,  $J = 1.7$  Hz), 129.27, 126.93, 123.10 (q,  $J = 271$  Hz), 117.17, 114.09 (q,  $J = 30$  Hz), 113.55, 108.13, 101.30, 63.51 (q,  $J = 3.6$  Hz), 55.47, 55.24.

$^{19}\text{F}$  NMR (376 MHz,  $\text{CDCl}_3$ )  $\delta$  -58.41.

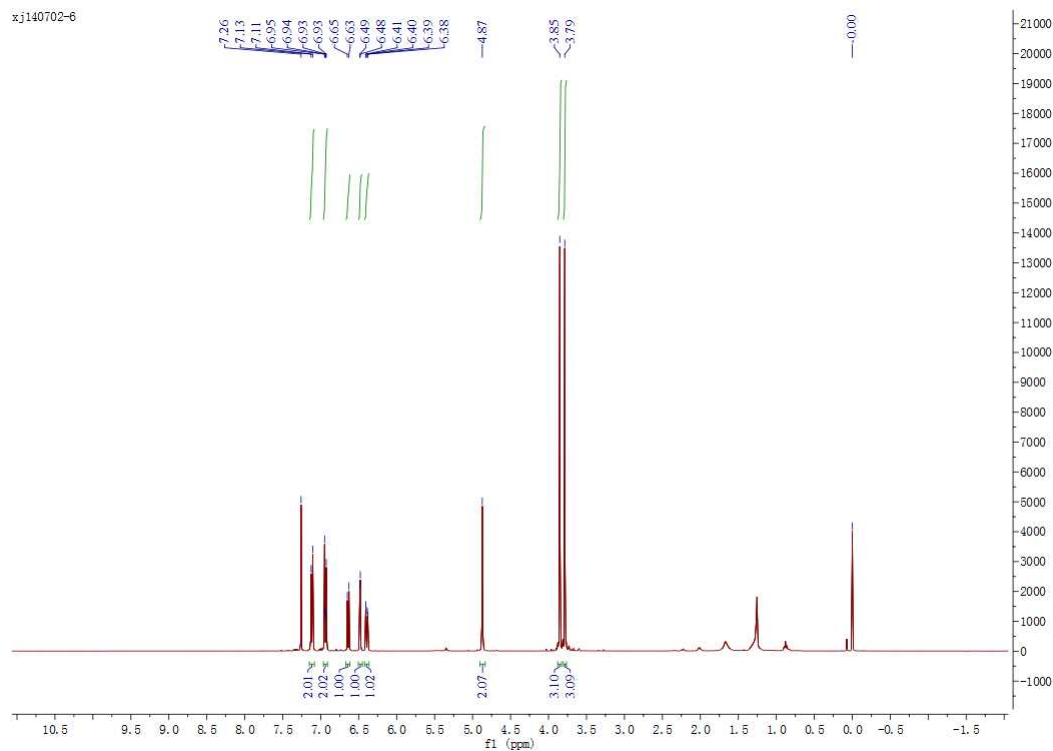

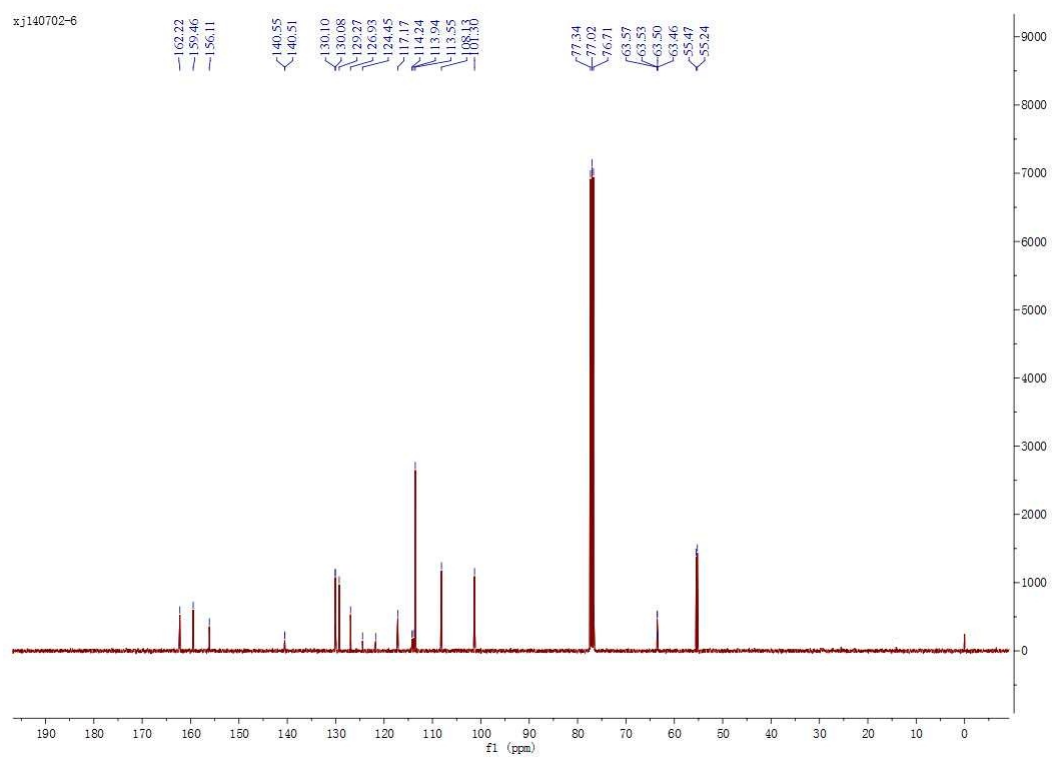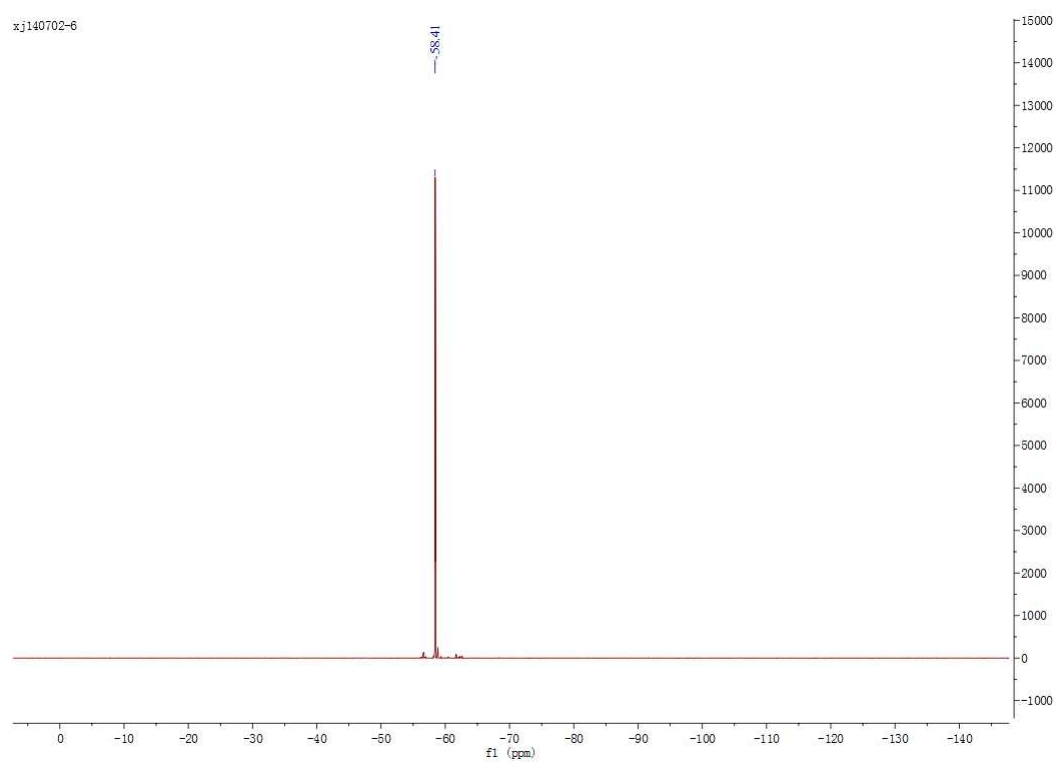

5-methoxy-4-(4-methoxyphenyl)-3-(trifluoromethyl)-2H-chromene (**3n'**)

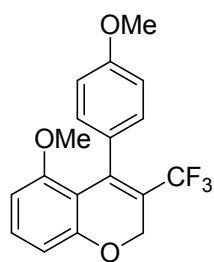

$^1\text{H}$  NMR (400 MHz,  $\text{CDCl}_3$ )  $\delta$  7.22 (t,  $J = 8.2$  Hz, 1H), 7.09 (d,  $J = 8.6$  Hz, 1H), 6.85 (d,  $J = 8.1$  Hz, 1H), 6.64 (d,  $J = 8.1$  Hz, 1H), 6.43 (d,  $J = 8.0$  Hz, 1H), 4.67 (s, 1H), 3.83 (s, 2H), 3.27 (s, 1H).

$^{13}\text{C}$  NMR (101 MHz,  $\text{CDCl}_3$ )  $\delta$  158.75, 158.54, 157.00, 140.34 (q,  $J = 4.1$  Hz), 131.85, 129.80, 129.24 (q,  $J = 1.9$  Hz), 122.88 (q,  $J = 271$  Hz), 116.67 (q,  $J = 29$  Hz), 114.35, 112.59, 108.85, 105.99, 63.15 (q,  $J = 3.7$  Hz), 55.65, 55.20.

$^{19}\text{F}$  NMR (376 MHz,  $\text{CDCl}_3$ )  $\delta$  -56.70.

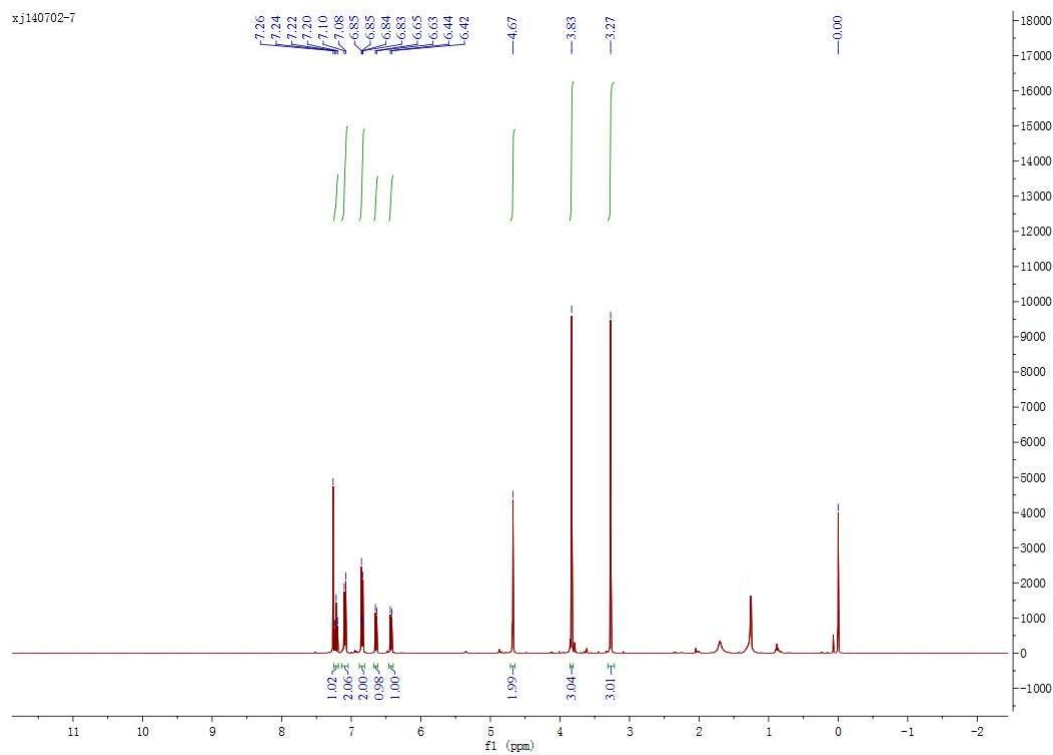

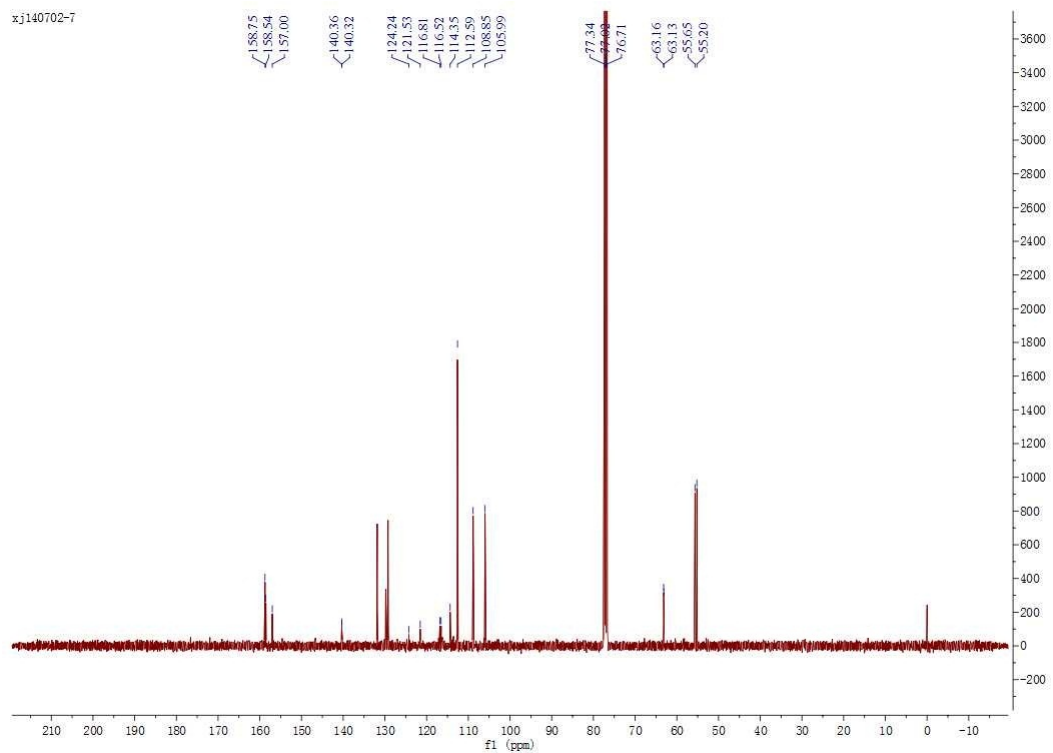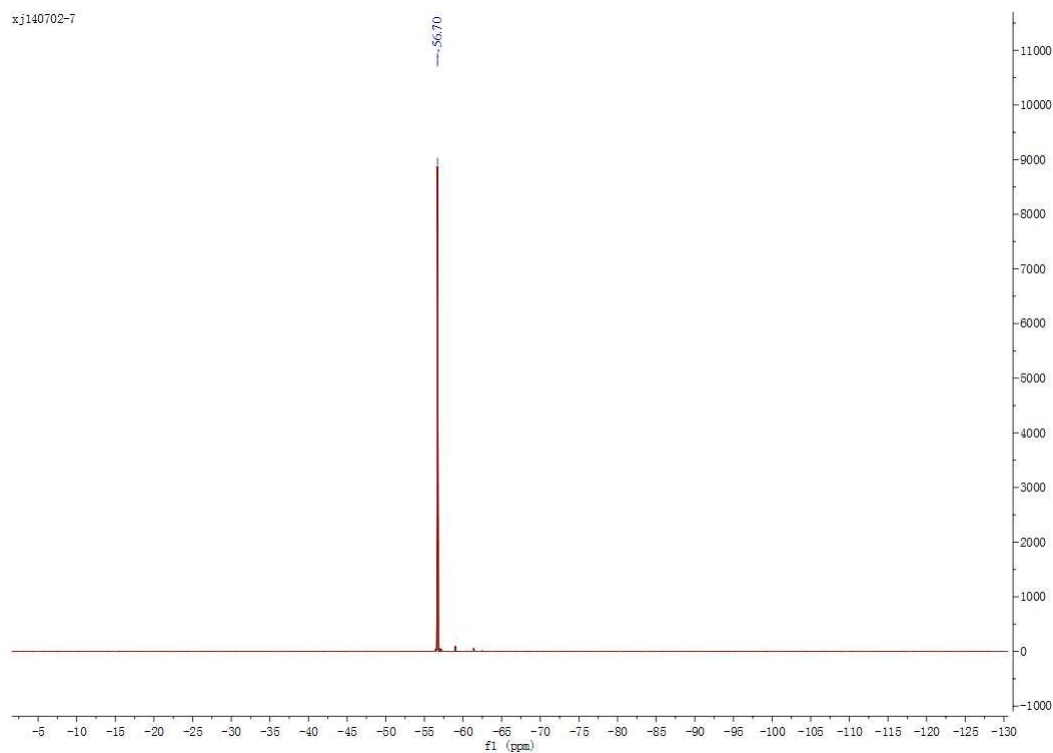

1-(4-(4-methoxyphenyl)-3-(trifluoromethyl)-2H-chromen-6-yl)ethanone (**3o**)

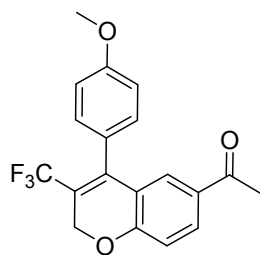

Prepared according to General Procedure **E**.

**<sup>1</sup>H NMR** (400 MHz, CDCl<sub>3</sub>) δ 7.86 (dd, *J* = 8.5, 1.9 Hz, 1H), 7.36 (d, *J* = 1.8 Hz, 1H), 7.13 (d, *J* = 8.6 Hz, 2H), 6.97 (d, *J* = 8.6 Hz, 3H), 4.98 (s, 2H), 3.87 (s, 3H), 2.39 (s, 3H).

**<sup>13</sup>C NMR** (100 MHz, CDCl<sub>3</sub>) δ 196.25, 159.81, 158.46, 139.94 (q, *J* = 4.0 Hz), 131.80, 131.38, 130.02 (q, *J* = 1.7 Hz), 128.78, 125.63, 123.50, 122.54 (q, *J* = 271 Hz), 116.31, 113.92, 63.59 (q, *J* = 3.6 Hz), 55.26, 26.26.

**<sup>19</sup>F NMR** (376 MHz, CDCl<sub>3</sub>) δ -59.28.

HRMS calcd for C<sub>19</sub>H<sub>15</sub>F<sub>3</sub>O<sub>3</sub> ([M]<sup>+</sup>): 348.0973; found: 348.0976.

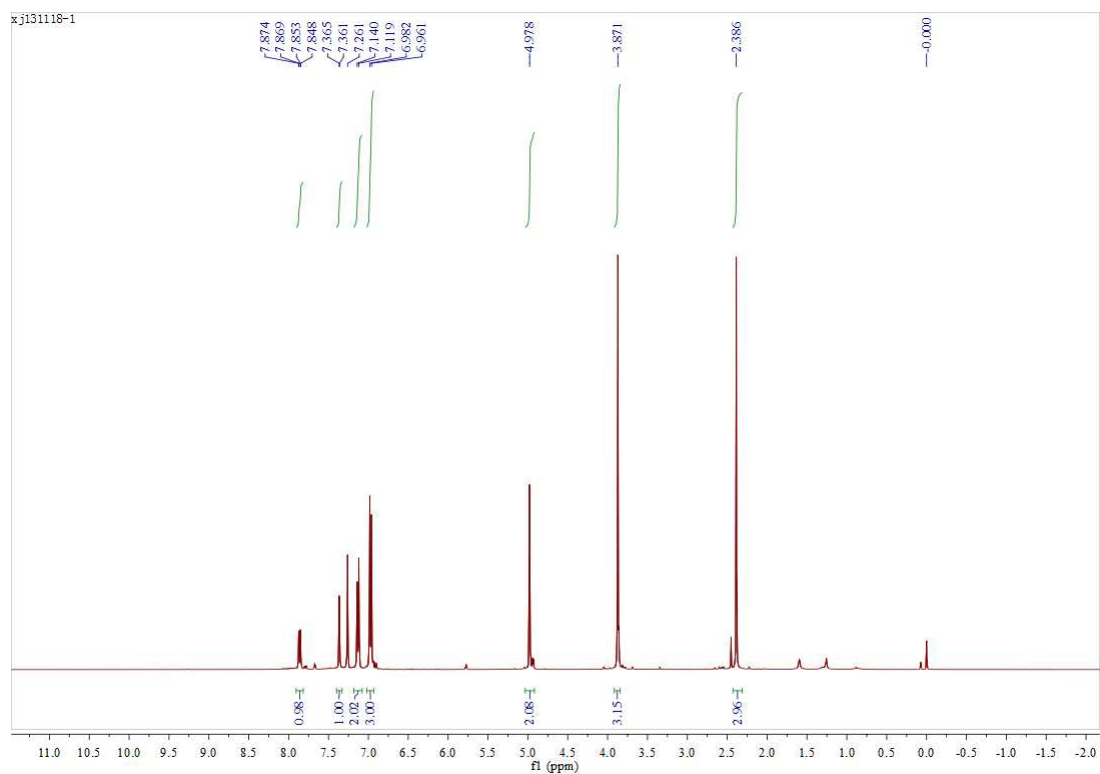

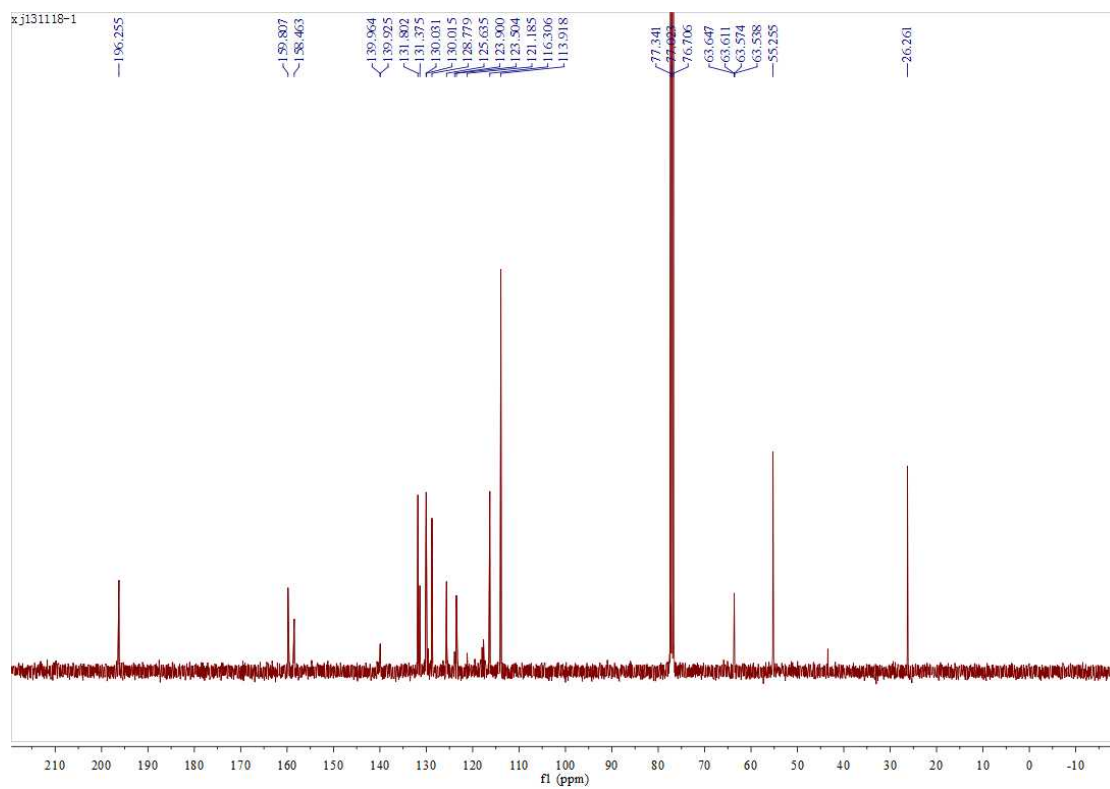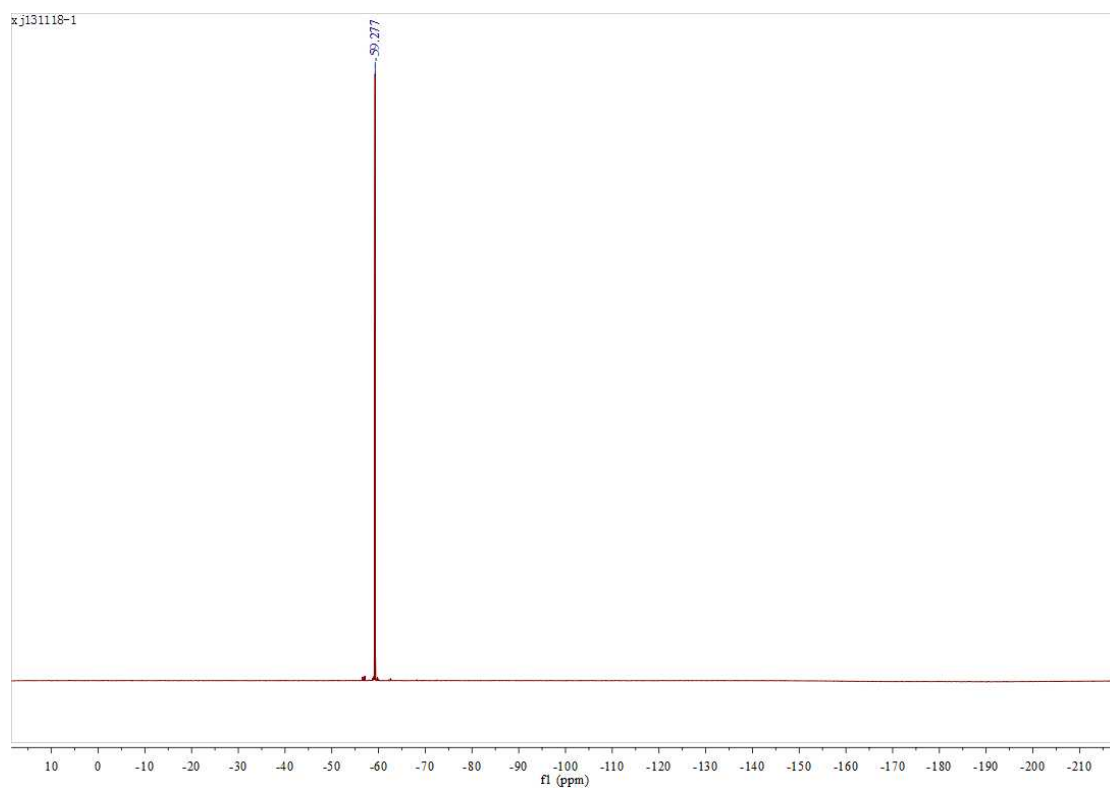



9-(4-methoxyphenyl)-8-(trifluoromethyl)-6,7-dihydro-5H-benzo[7]annulene (**3p**)

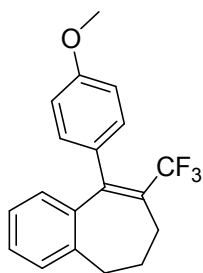

Prepared according to General Procedure **E**.

**<sup>1</sup>H NMR** (400 MHz, CDCl<sub>3</sub>) δ 7.25 – 7.21 (m, 2H), 7.16 – 7.11 (m, 1H), 7.06 (d, *J* = 8.5 Hz, 2H), 6.85 (d, *J* = 8.9 Hz, 2H), 6.77 (d, *J* = 7.5 Hz, 1H), 3.82 (s, 3H), 2.76 (t, *J* = 7.0 Hz, 2H), 2.32 – 2.24 (m, 2H), 2.12 (t, *J* = 6.9 Hz, 2H).

**<sup>13</sup>C NMR** (100 MHz, CDCl<sub>3</sub>) δ 159.29, 146.47 (q, *J* = 2.5 Hz), 141.20, 141.04, 132.60, 130.77 (q, *J* = 2.1 Hz), 130.24, 128.55, 128.33, 126.20, 126.12 (q, *J* = 31.3 Hz), 124.88 (q, *J* = 274 Hz), 113.18, 55.21, 35.69, 31.81, 26.38 (q, *J* = 2.0 Hz).

**<sup>19</sup>F NMR** (376 MHz, CDCl<sub>3</sub>) δ -58.49.

HRMS calcd for C<sub>19</sub>H<sub>17</sub>F<sub>3</sub>O ([M]<sup>+</sup>): 318.1231; found: 318.1234.

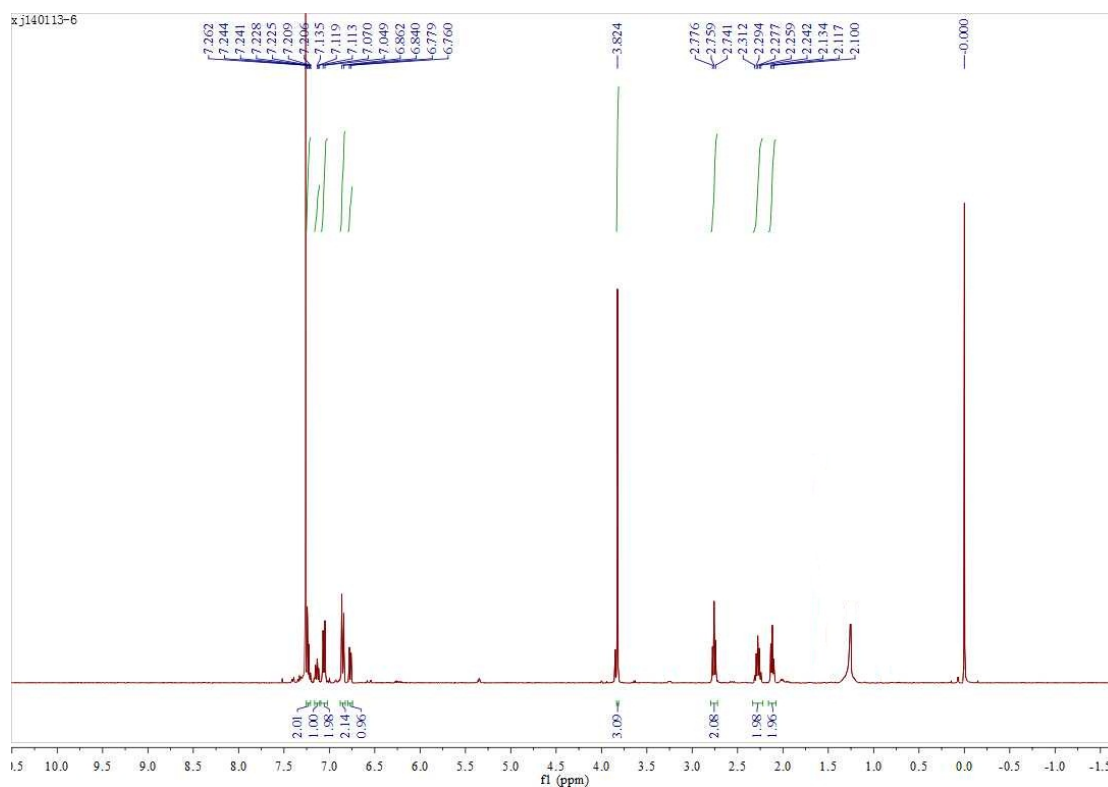

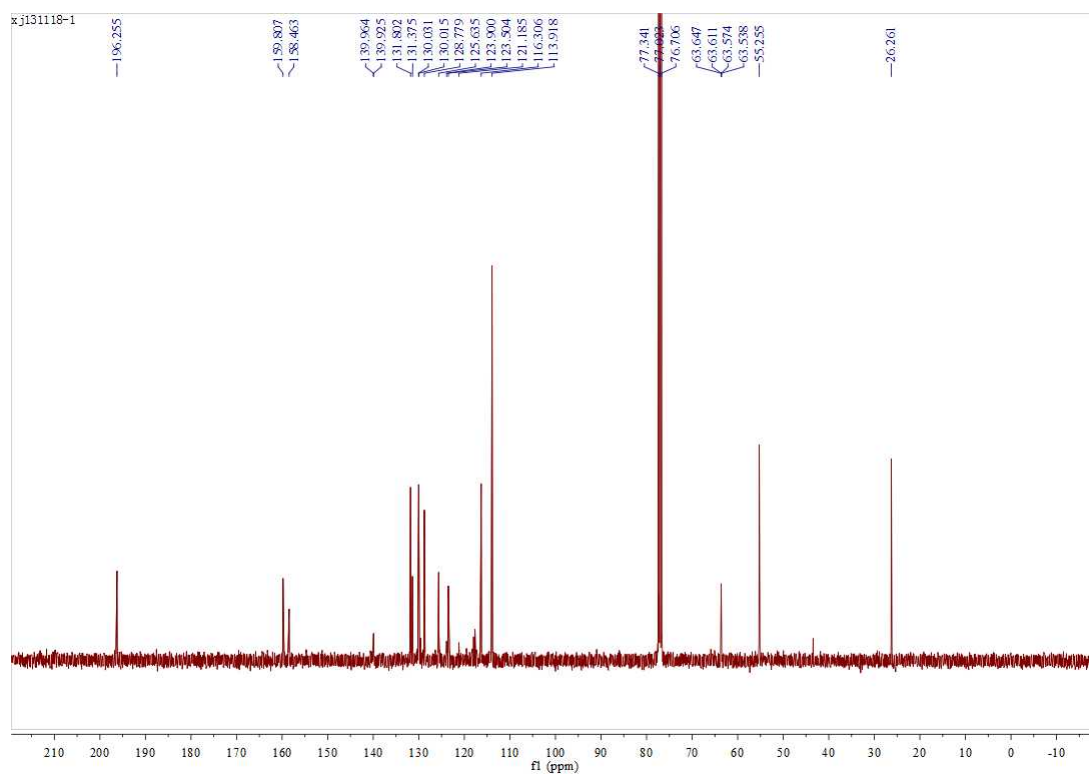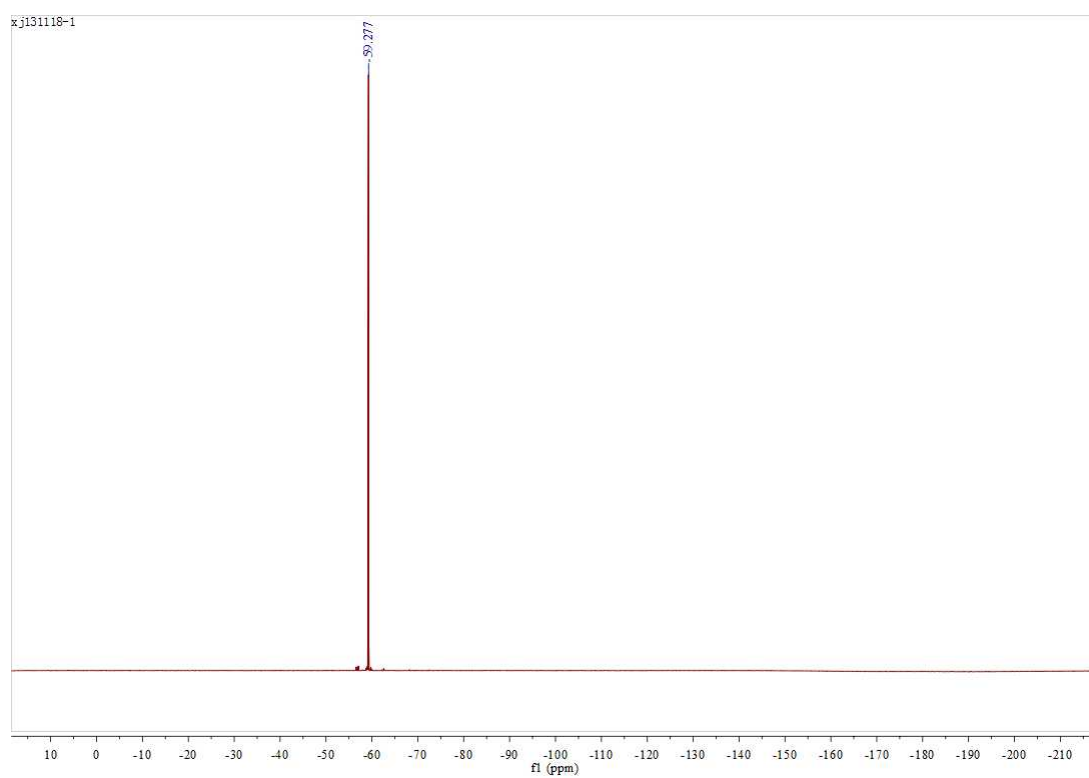

4-(4-methoxyphenyl)-5-(trifluoromethyl)-6,7-dihydrobenzo[b]thiophene (**3r**)

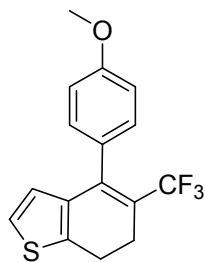

Prepared according to General Procedure E.

**<sup>1</sup>H NMR** (400 MHz, CDCl<sub>3</sub>) δ 7.13 (d, *J* = 8.8 Hz, 2H), 6.95 – 6.88 (m, 3H), 6.43 (d, *J* = 5.2 Hz, 1H), 3.84 (s, 3H), 3.01 (t, *J* = 8.7 Hz, 2H), 2.73 (t, *J* = 8.5 Hz, 2H).

**<sup>13</sup>C NMR** (100 MHz, CDCl<sub>3</sub>) δ 159.06, 138.80 (q, *J* = 4.2 Hz), 137.60, 136.89, 129.94, 129.46 (q, *J* = 2.0 Hz), 126.55, 124.70 (q, *J* = 271 Hz), 121.58, 119.29 (q, *J* = 28.6 Hz), 113.44, 55.22, 23.83 (q, *J* = 3 Hz), 22.80.

**<sup>19</sup>F NMR** (376 MHz, CDCl<sub>3</sub>) δ -58.55.

HRMS calcd for C<sub>16</sub>H<sub>13</sub>F<sub>3</sub>OS ([M]<sup>+</sup>): 310.0639; found: 310.06341.

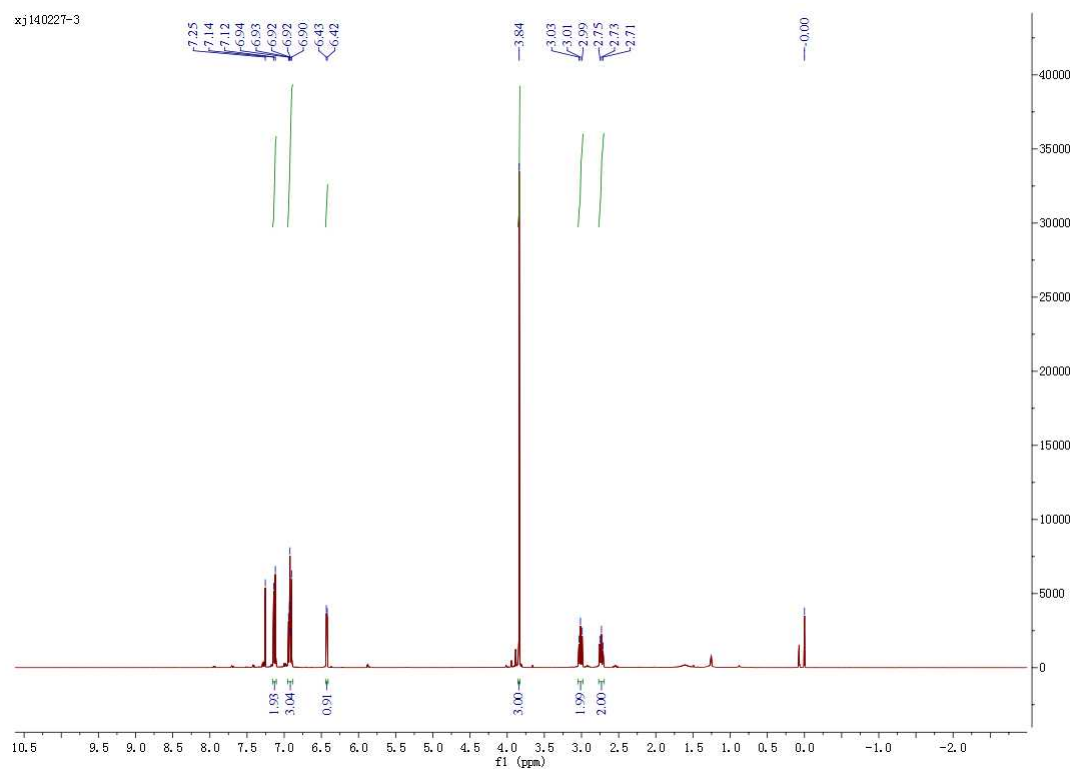

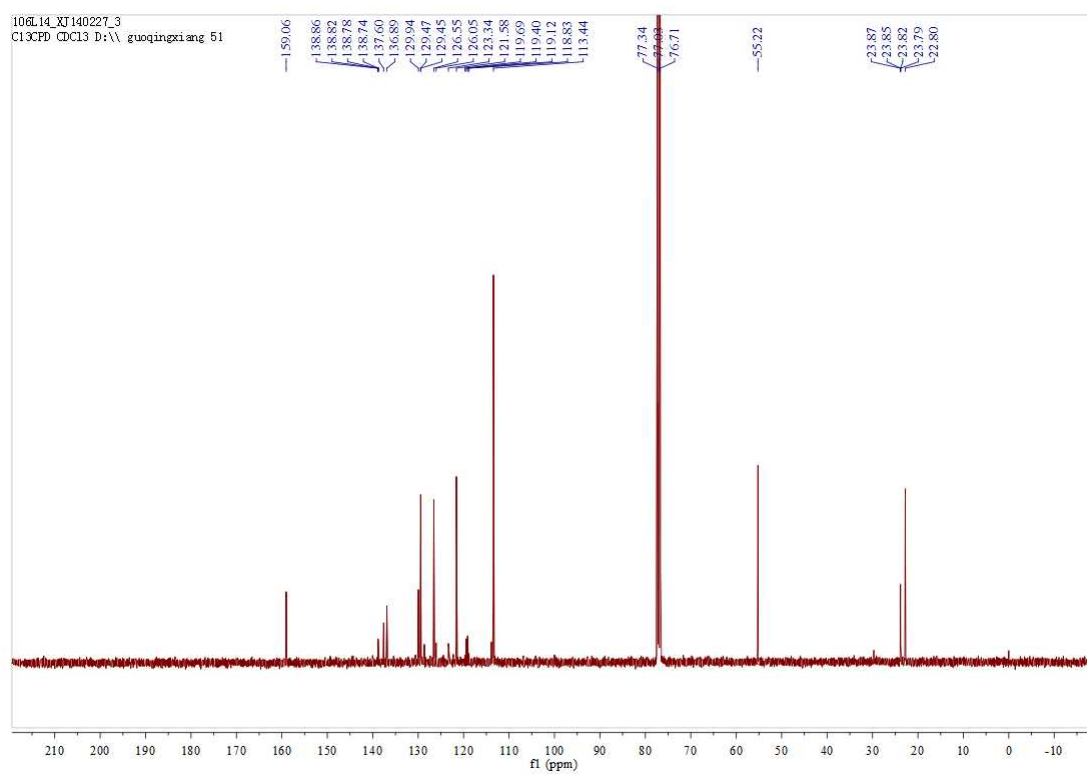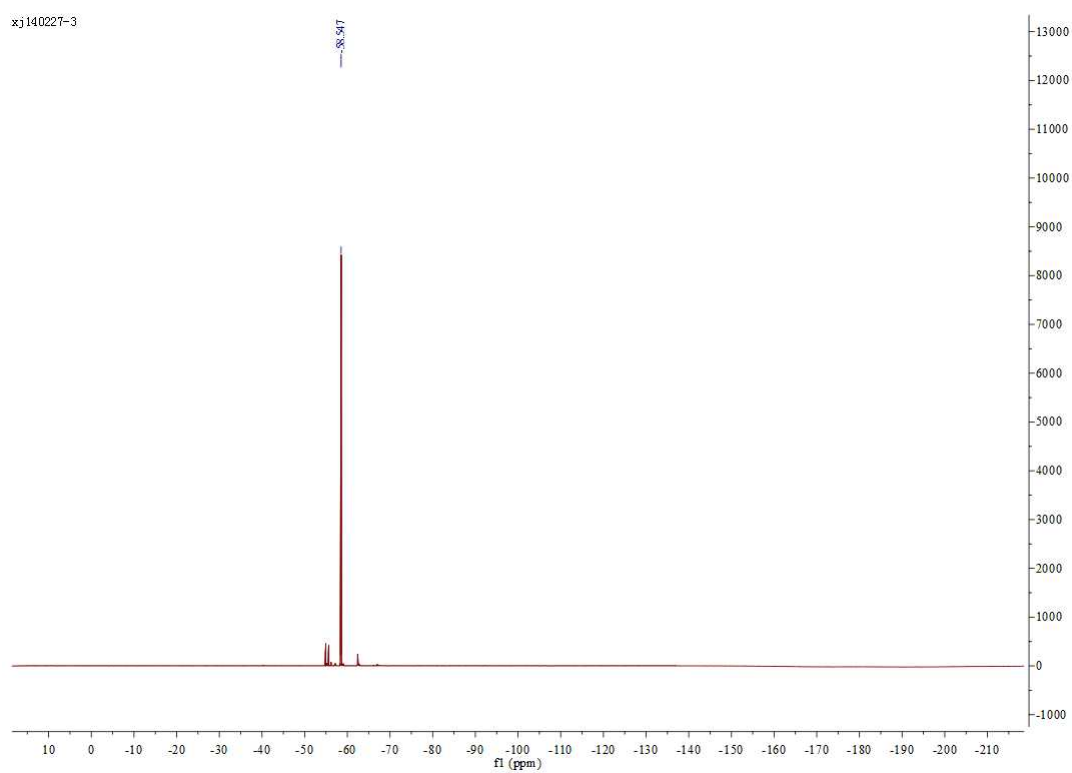

(13a*S*)-10-(4-methoxyphenyl)-13a-methyl-9-(trifluoromethyl)-3,3a,3b,4,5,8,11b,12,13,13a-decahydrocyclopenta[5,6]naphtho[1,2-*g*]chromen-1(2*H*)-one (**3r**) and (8a*S*)-1-(4-methoxyphenyl)-8a-methyl-2-(trifluoromethyl)-6b,7,8,8a,10,11,11a,11b,12,13-decahydrocyclopenta[5,6]naphtho[2,1-*f*]chromen-9(3*H*)-one (**3s'**)

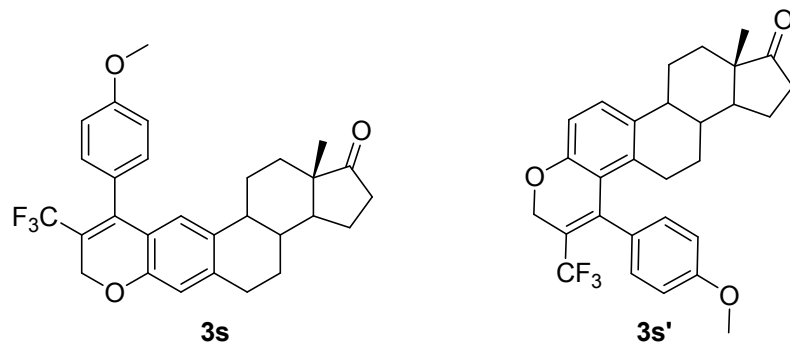

Note: Prepared according to General Procedure E, and the yield and ratio were determined by  $^{19}\text{F}$  NMR with  $\text{PhCF}_3$  as internal standard. The two products can not be separated from each other by column chromatographic for the similar polarity, and the molecular weight and structures was determined by GC-MS and HRMS (calcd for  $\text{C}_{29}\text{H}_{30}\text{F}_3\text{O}_3$  ( $[\text{M}+\text{H}]^+$ ): 483.2147; found: 483.2145).

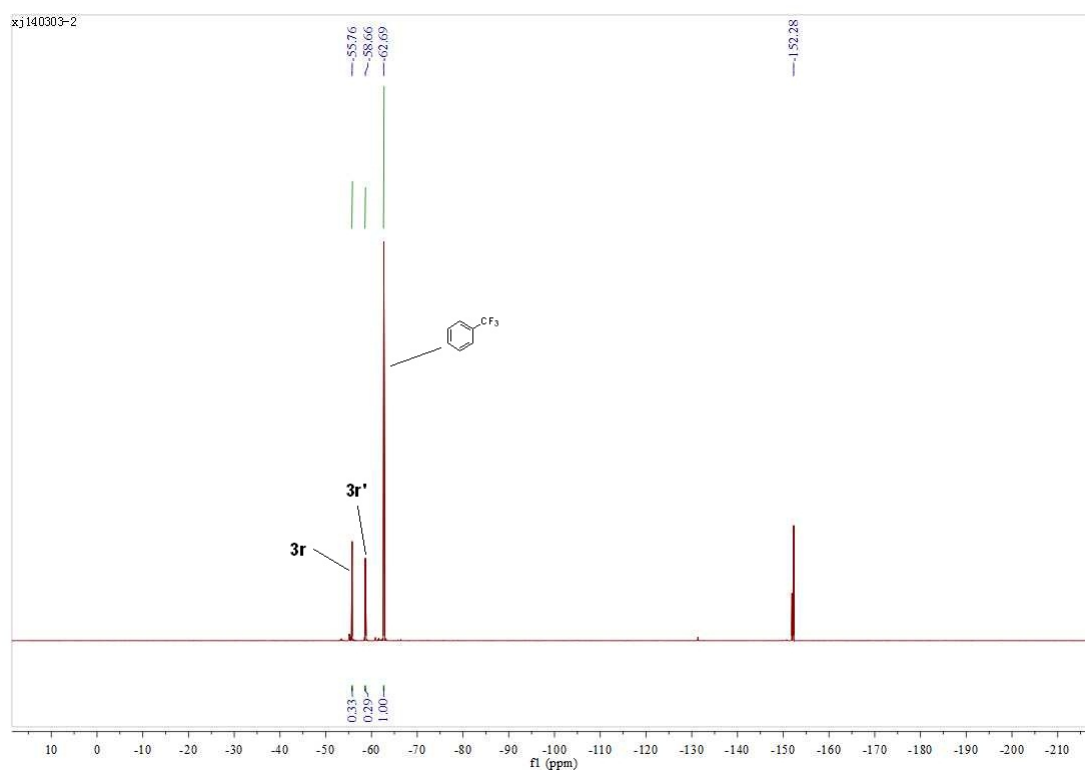

RT: 30.54 - 42.38

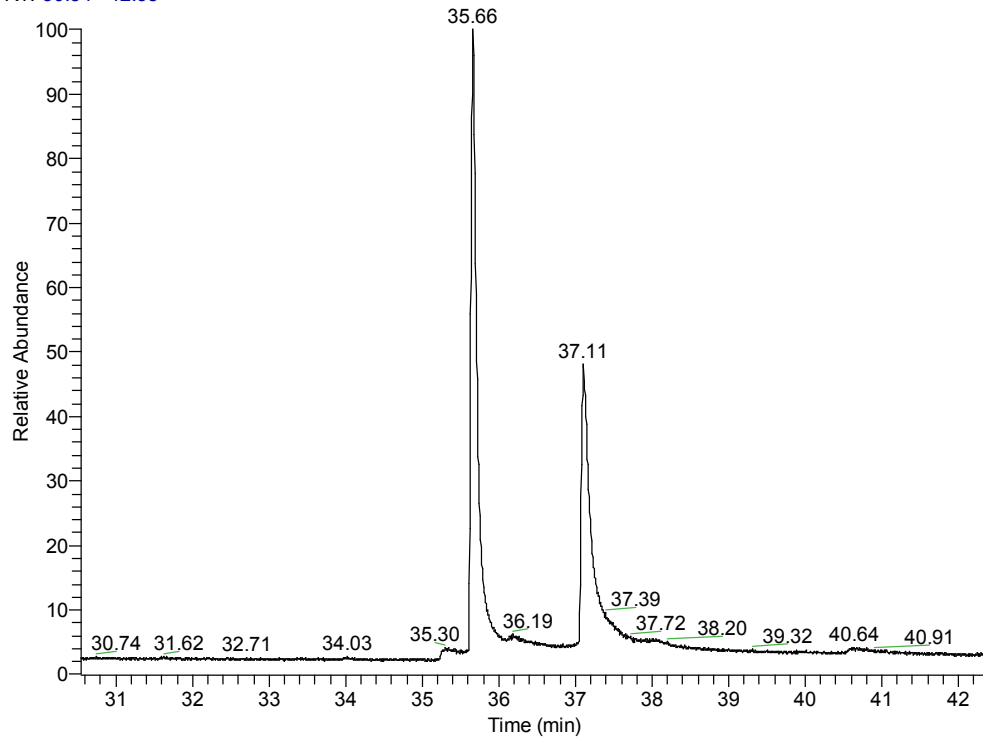

NL:  
7.21E5  
TIC MS  
xj140307-2

xj140307-2 #9370 RT: 35.67 AV: 1 NL: 3.35E4  
T: + c Full ms [20.00-650.00]

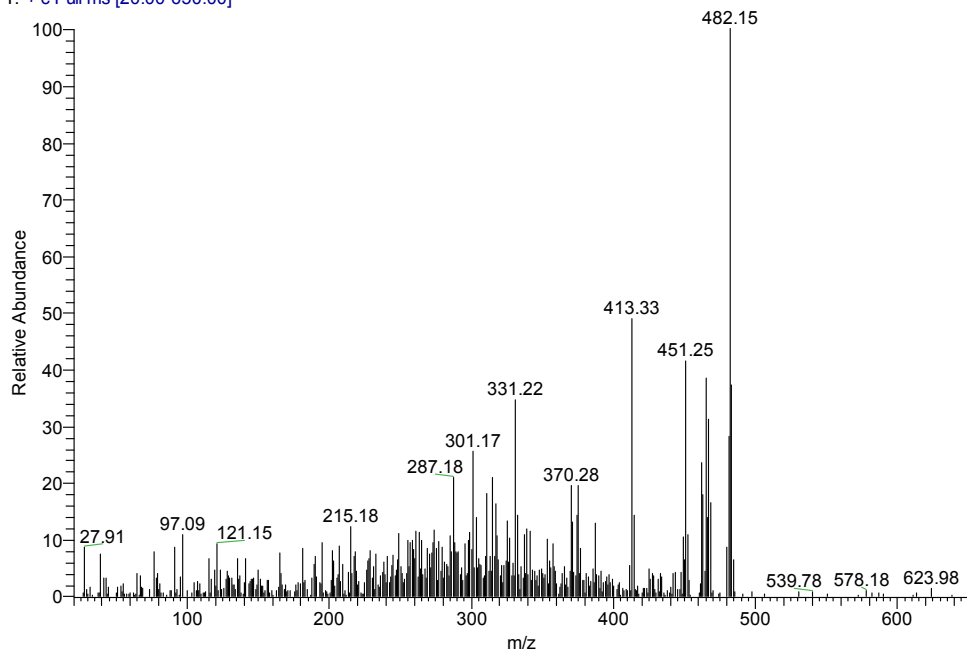

xj140307-2 #9737 RT: 37.10 AV: 1 NL: 2.48E4  
T: + c Full ms [20.00-650.00]

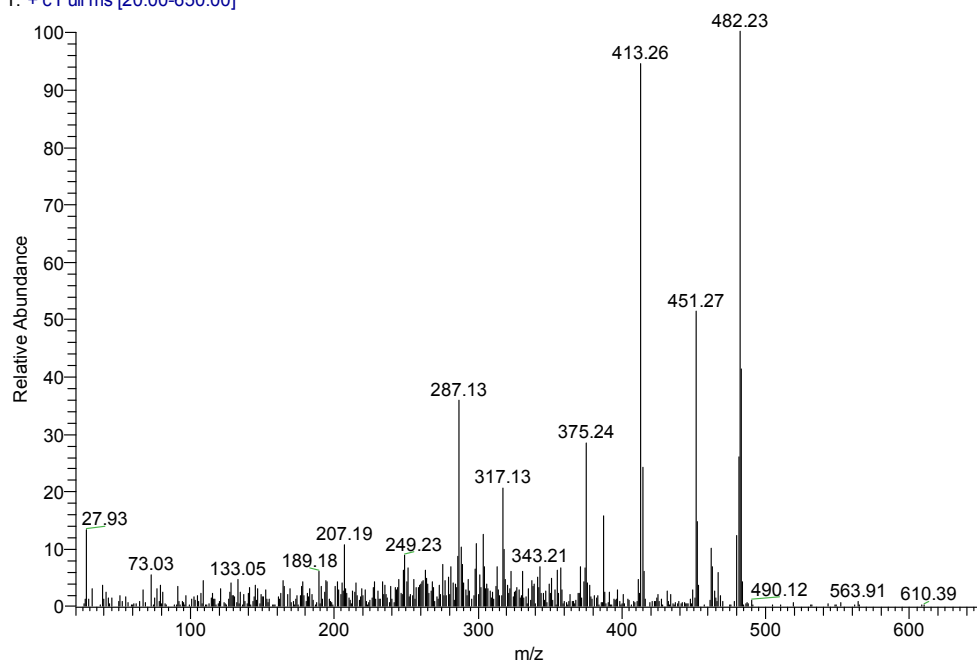

8-phenyl-7-(trifluoromethyl)-2,3,5,6-tetrahydronaphtho[2,3-b]furan (**3t**)

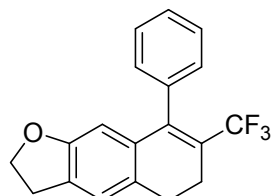

Prepared according to General Procedure E.

**<sup>1</sup>H NMR** (400 MHz, CDCl<sub>3</sub>) δ 7.36 (m, 3H), 7.15 (d, *J* = 8 Hz, 2H), 7.04 (s, 1H), 6.13 (s, 1H), 4.49 (t, *J* = 8.7 Hz, 2H), 3.17 (t, *J* = 8.7 Hz, 2H), 2.87 (t, *J* = 8 Hz, 2H), 2.57 (t, *J* = 7.9 Hz, 2H).

**<sup>13</sup>C NMR** (100 MHz, CDCl<sub>3</sub>) δ 158.82, 142.12 (q, *J* = 2 Hz), 137.25, 134.82, 128.90 (q, *J* = 2 Hz), 128.41, 127.98, 127.51, 127.49, 124.35 (q, *J* = 271 Hz), 123.98 (q, *J* = 29 Hz), 123.70, 108.97, 71.15, 29.72, 27.50, 22.95 (q, *J* = 2.5 Hz).

**<sup>19</sup>F NMR** (376 MHz, CDCl<sub>3</sub>) δ -59.10.

HRMS calcd for C<sub>19</sub>H<sub>15</sub>F<sub>3</sub>O ([M]<sup>+</sup>): 316.1075; found: 316.1078.

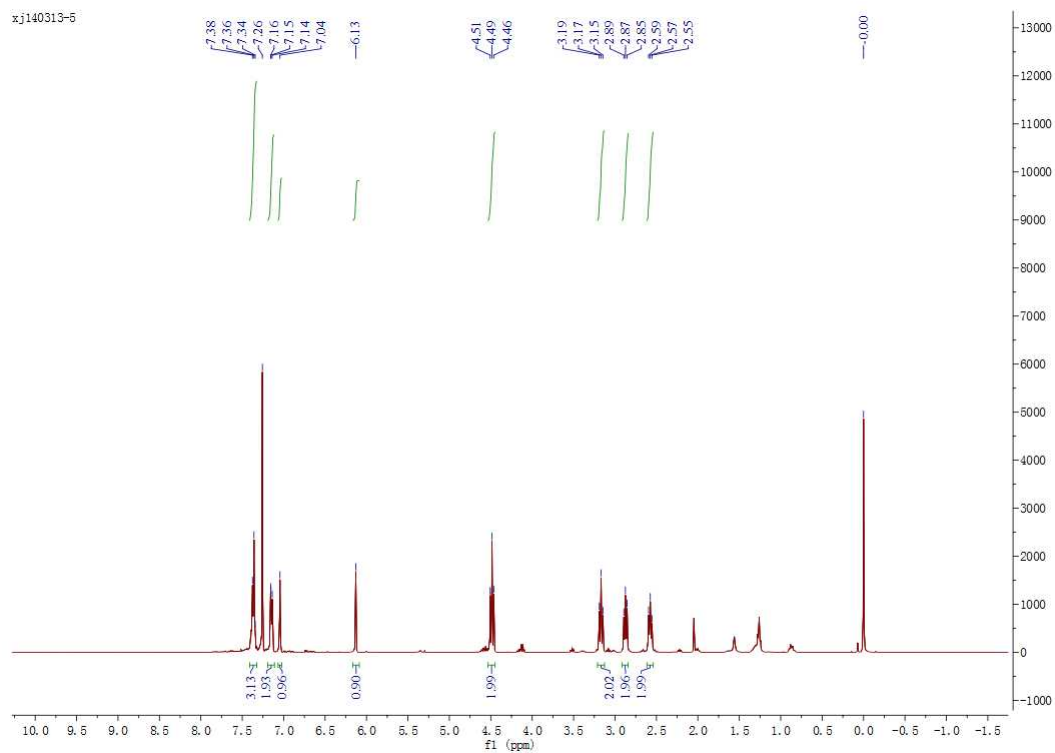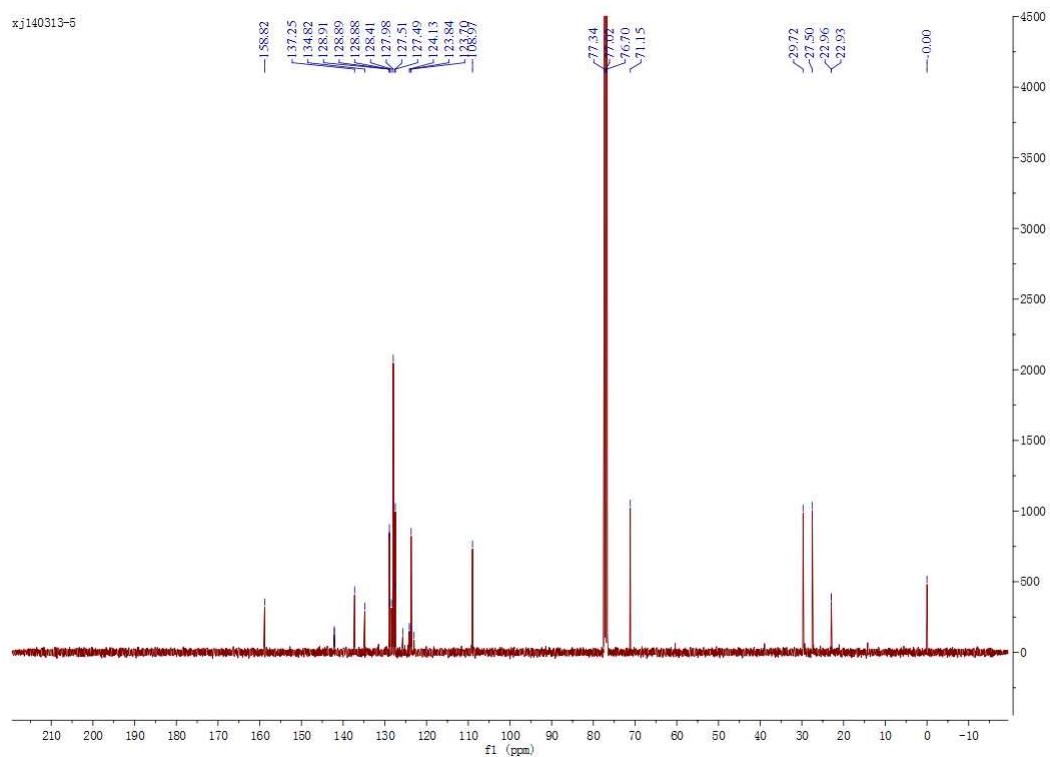



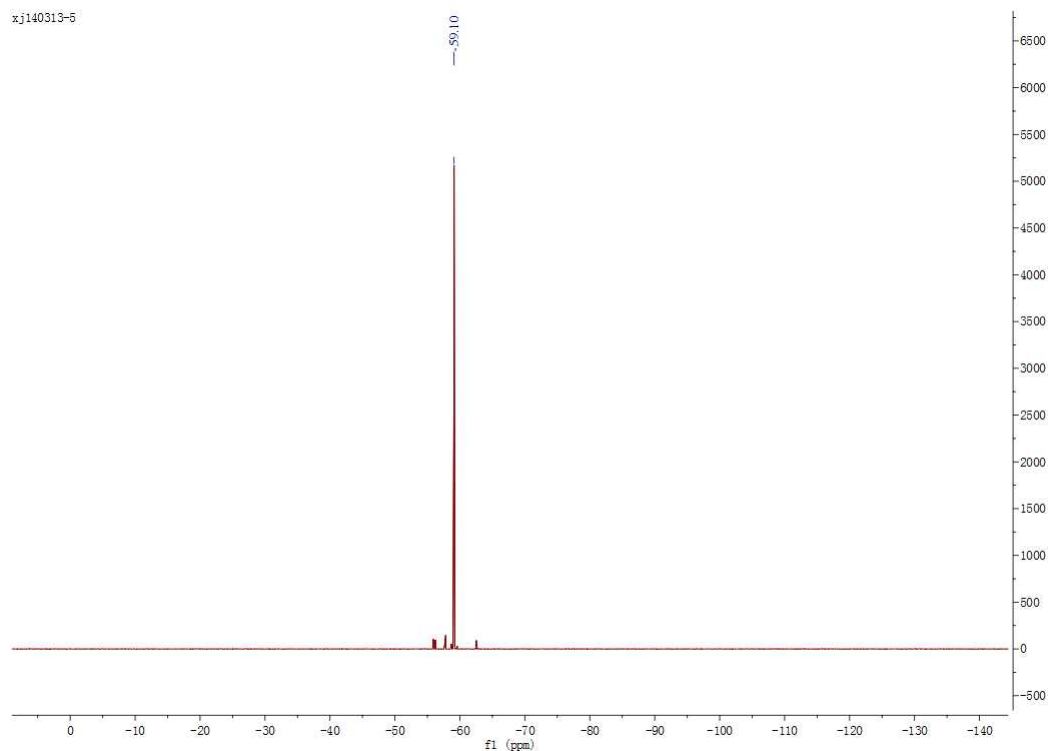

8-(thiophen-2-yl)-7-(trifluoromethyl)-2,3,5,6-tetrahydronaphtho[2,3-b]furan (**3u**)

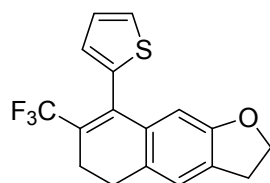

Prepared according to General Procedure E.

**<sup>1</sup>H NMR** (400 MHz, CDCl<sub>3</sub>) δ 7.38 (dd, *J* = 5.1, 1.0 Hz, 1H), 7.04 (m, 1H), 7.02 (s, 1H), 6.93 (d, *J* = 3.2 Hz, 1H), 6.34 (s, 1H), 4.50 (t, *J* = 8.7 Hz, 2H), 3.17 (t, *J* = 8.6 Hz, 2H), 2.85 (t, *J* = 8.4 Hz, 2H), 2.58 (t, *J* = 7.9 Hz, 2H).

**<sup>13</sup>C NMR** (100 MHz, CDCl<sub>3</sub>) δ 159.03, 136.50, 135.47 (q, *J* = 4.0 Hz), 134.79, 128.21 (q, *J* = 2.0 Hz), 128.11, 127.90, 127.66 (q, *J* = 28.6 Hz), 126.54, 126.20, 124.06 (q, *J* = 271 Hz), 123.62, 108.57, 71.17, 29.73, 27.19, 23.33 (q, *J* = 2.6 Hz).

**<sup>19</sup>F NMR** (376 MHz, CDCl<sub>3</sub>) δ -59.56.

HRMS calcd for C<sub>17</sub>H<sub>13</sub>F<sub>3</sub>OS ([M]<sup>+</sup>): 322.0639; found: 322.0642.

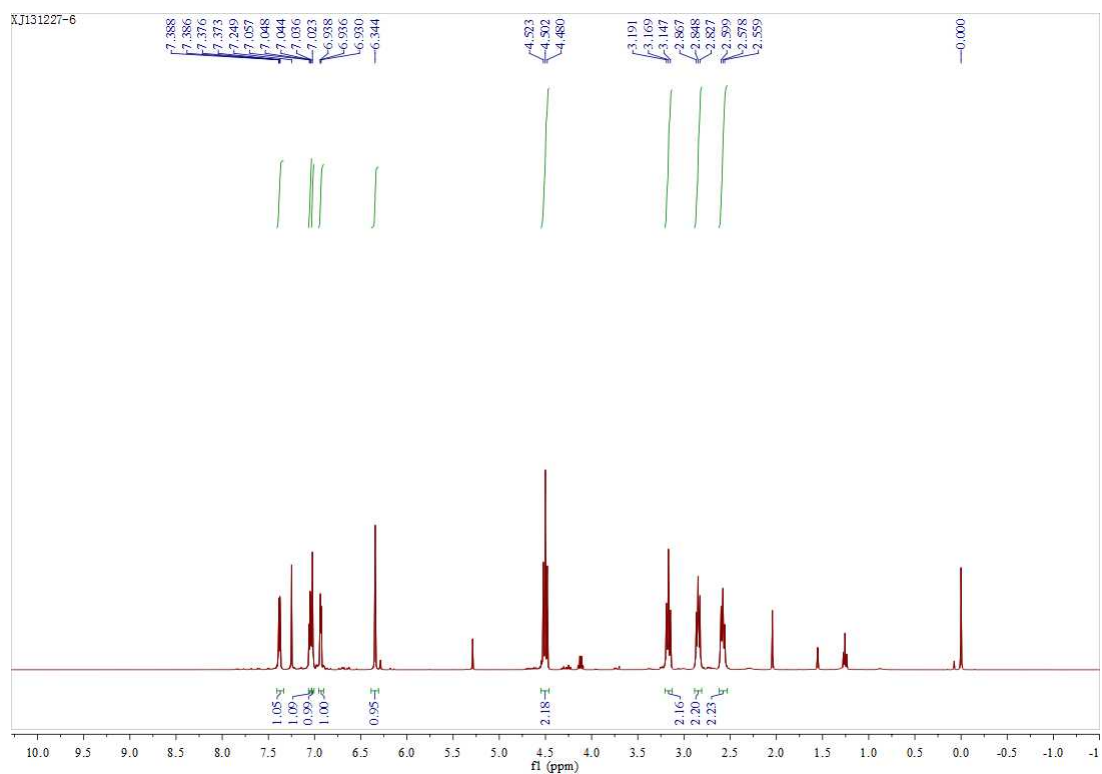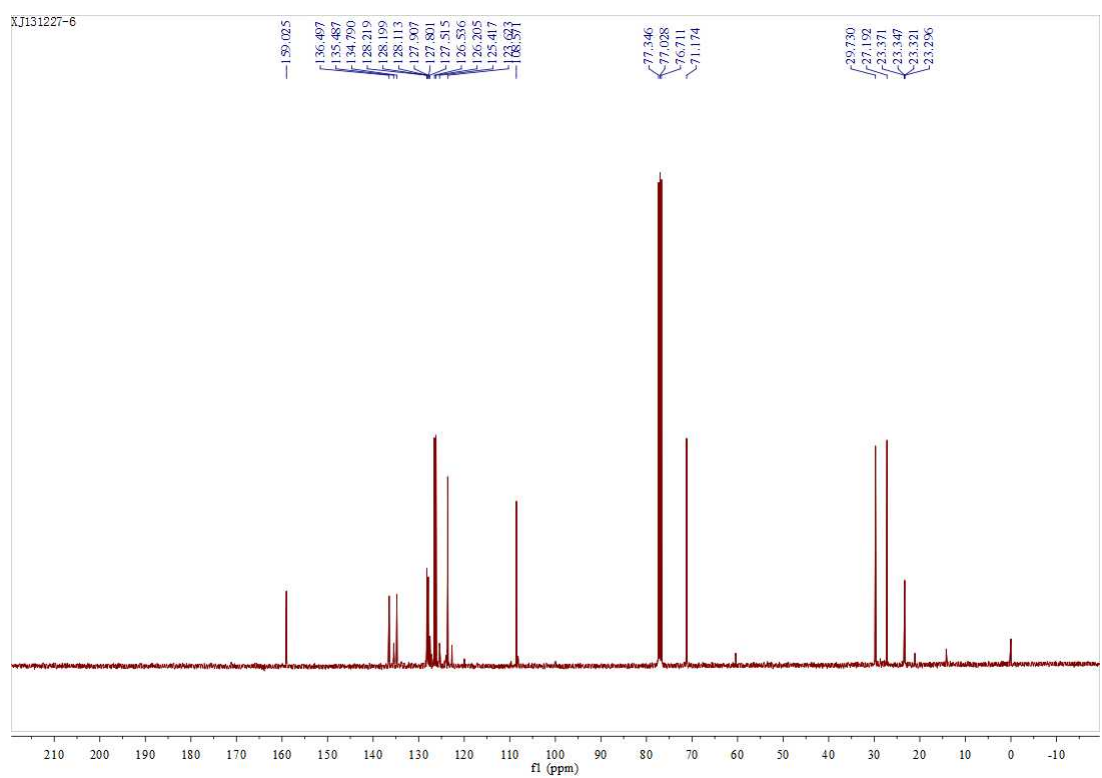

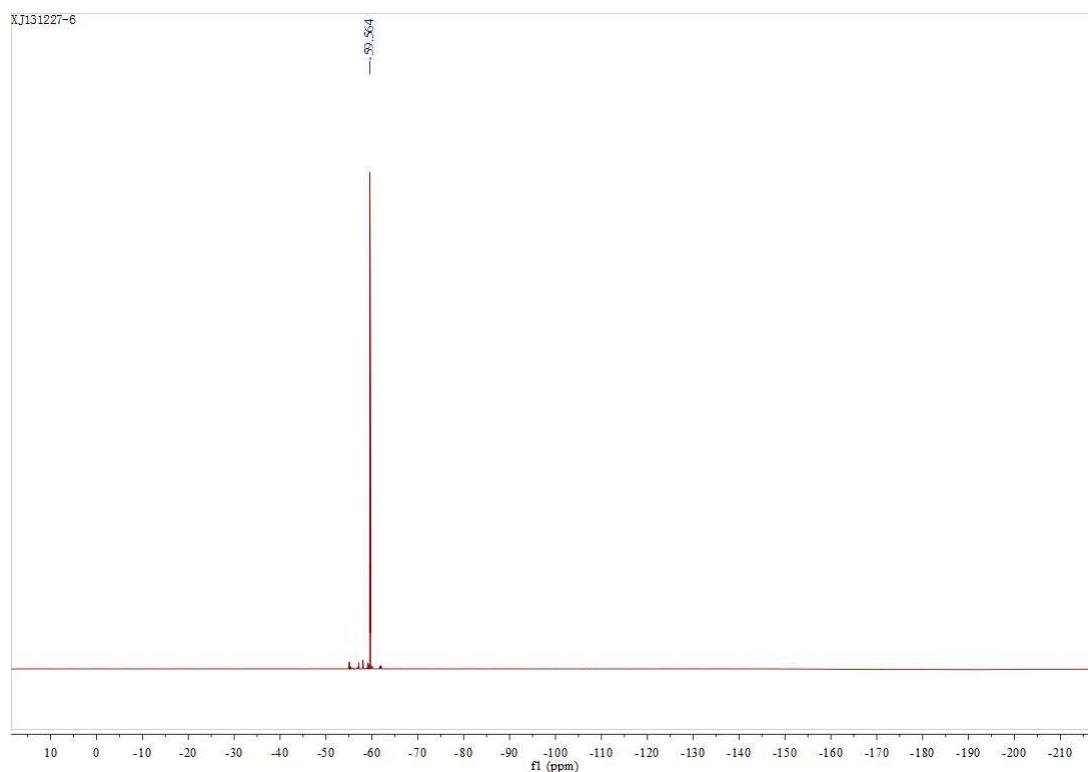

(E)-4-styryl-3-(trifluoromethyl)-1,2-dihydronaphthalene (**3v**)

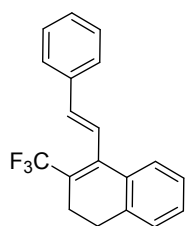

Prepared according to General Procedure **E**.

**<sup>1</sup>H NMR** (400 MHz, CDCl<sub>3</sub>) δ 7.45 (t, *J* = 7.2 Hz, 1H), 7.43 – 7.38 (m, 2H), 7.31 (t, *J* = 5.6 Hz, 2H), 7.24 – 7.10 (m, 5H), 6.62 (d, *J* = 16.5 Hz, 1H), 2.76 (t, *J* = 7.8 Hz, 2H), 2.43 (t, *J* = 7.7 Hz, 2H).

**<sup>13</sup>C NMR** (100 MHz, CDCl<sub>3</sub>) δ 139.18 (q, *J* = 4.2 Hz), 137.35, 136.75, 135.76 (q, *J* = 2.0 Hz), 133.69, 128.81, 128.75, 128.24, 127.59, 127.55, 126.72, 126.46, 124.80 (q, *J* = 271 Hz), 124.03 (q, *J* = 28.6 Hz), 123.07, 27.96, 22.79 (q, *J* = 3.1 Hz).

**<sup>19</sup>F NMR** (376 MHz, CDCl<sub>3</sub>) δ -58.84.

HRMS calcd for C<sub>19</sub>H<sub>15</sub>F<sub>3</sub> ([M]<sup>+</sup>): 300.1126; found: 300.1129.



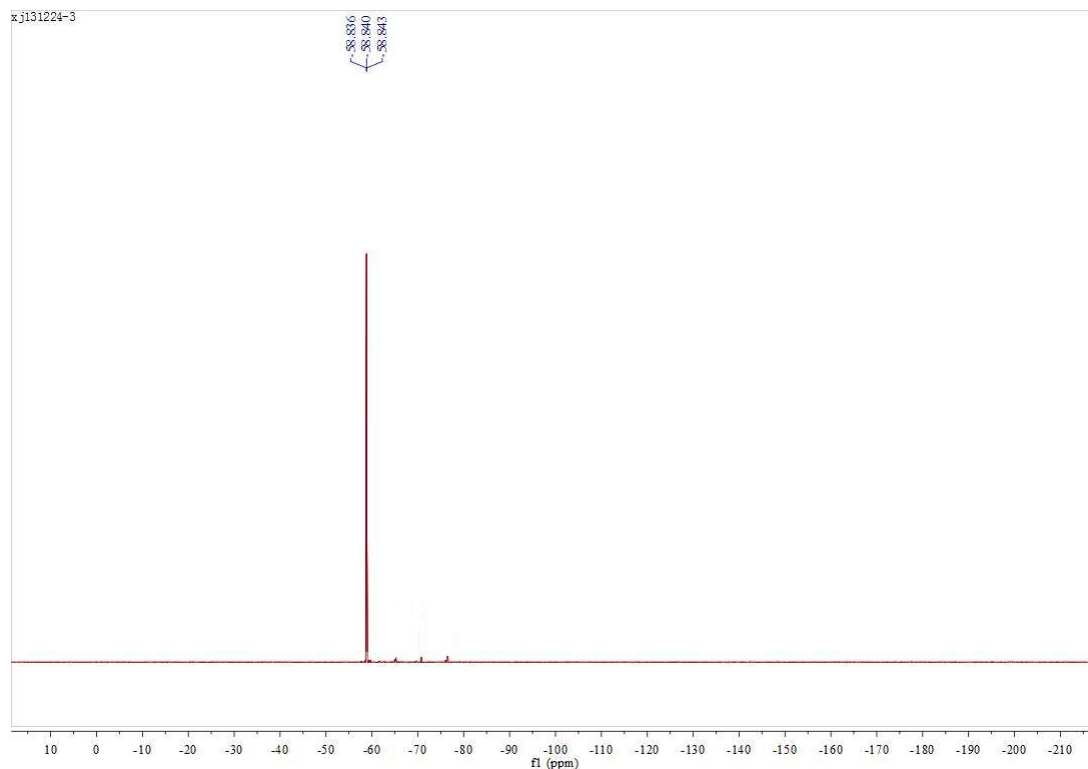

8-(6-methoxynaphthalen-2-yl)-7-(trifluoromethyl)-2,3,5,6-tetrahydronaphtho[2,3-b]furan (**3w**)

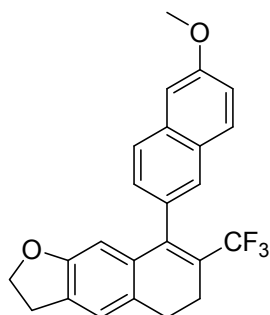

Prepared according to General Procedure E.

**<sup>1</sup>H NMR** (400 MHz, CDCl<sub>3</sub>) δ 7.75 (d, *J* = 8.4 Hz, 1H), 7.71 (d, *J* = 10 Hz, 1H), 7.56 (s, 1H), 7.22 (dd, *J* = 8.4, 1.6 Hz, 1H), 7.19 – 7.14 (m, 2H), 7.06 (s, 1H), 6.13 (s, 1H), 4.46 (t, *J* = 8.7 Hz, 2H), 3.94 (s, 3H), 3.16 (t, *J* = 8.7 Hz, 2H), 2.90 (t, *J* = 8.0 Hz, 2H), 2.61 (t, *J* = 7.9 Hz, 2H).

**<sup>13</sup>C NMR** (100 MHz, CDCl<sub>3</sub>) δ 158.87, 157.87, 142.17, 135.04, 133.79, 132.49, 129.54, 128.50, 128.45, 127.68, 127.63, 127.45, 126.44, 124.44 (q, *J* = 272 Hz), 124.33 (q, *J* = 28.5 Hz), 123.72, 119.05, 109.11, 105.67, 71.14, 55.38, 29.74, 27.57, 23.07 (q, *J* = 2.5 Hz).

**<sup>19</sup>F NMR** (376 MHz, CDCl<sub>3</sub>) δ -58.99.

HRMS calcd for C<sub>24</sub>H<sub>19</sub>F<sub>3</sub>O<sub>2</sub> ([M]<sup>+</sup>): 396.1337; found: 396.1334.

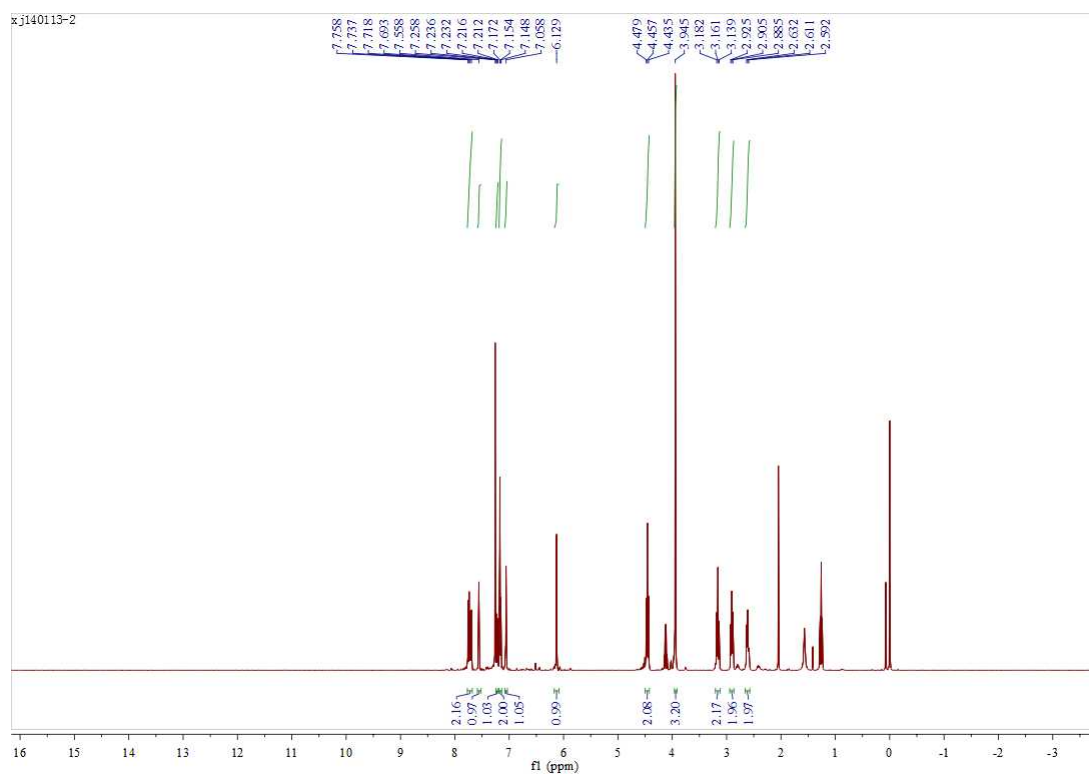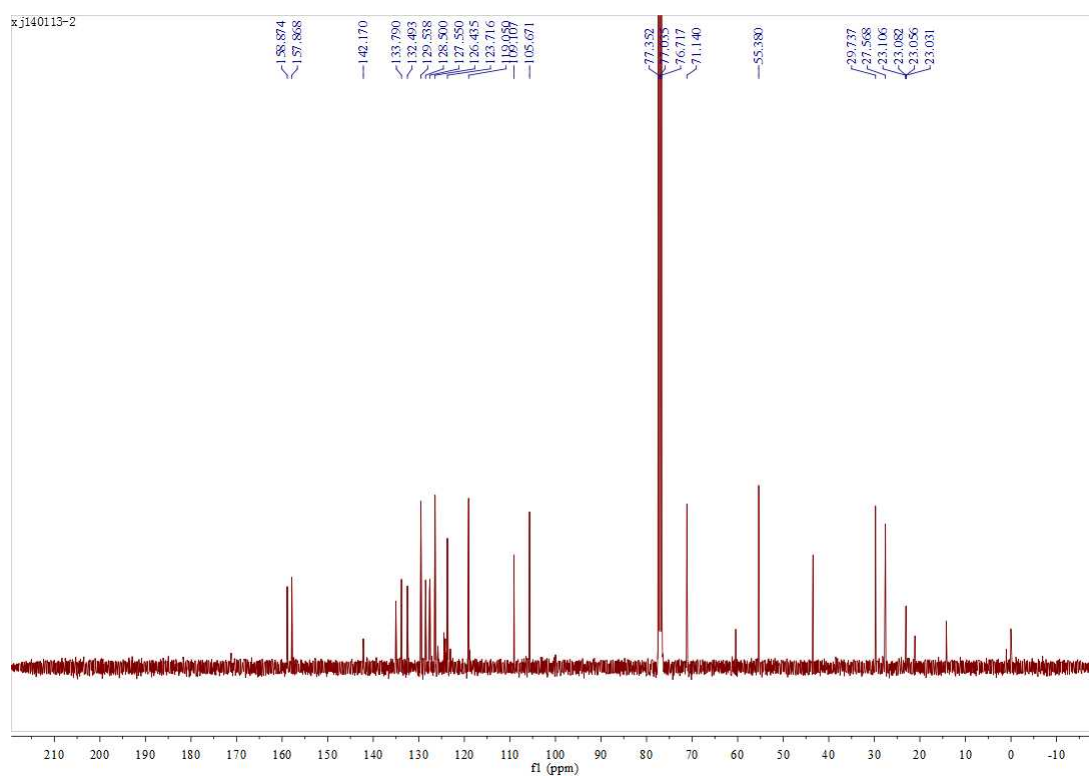

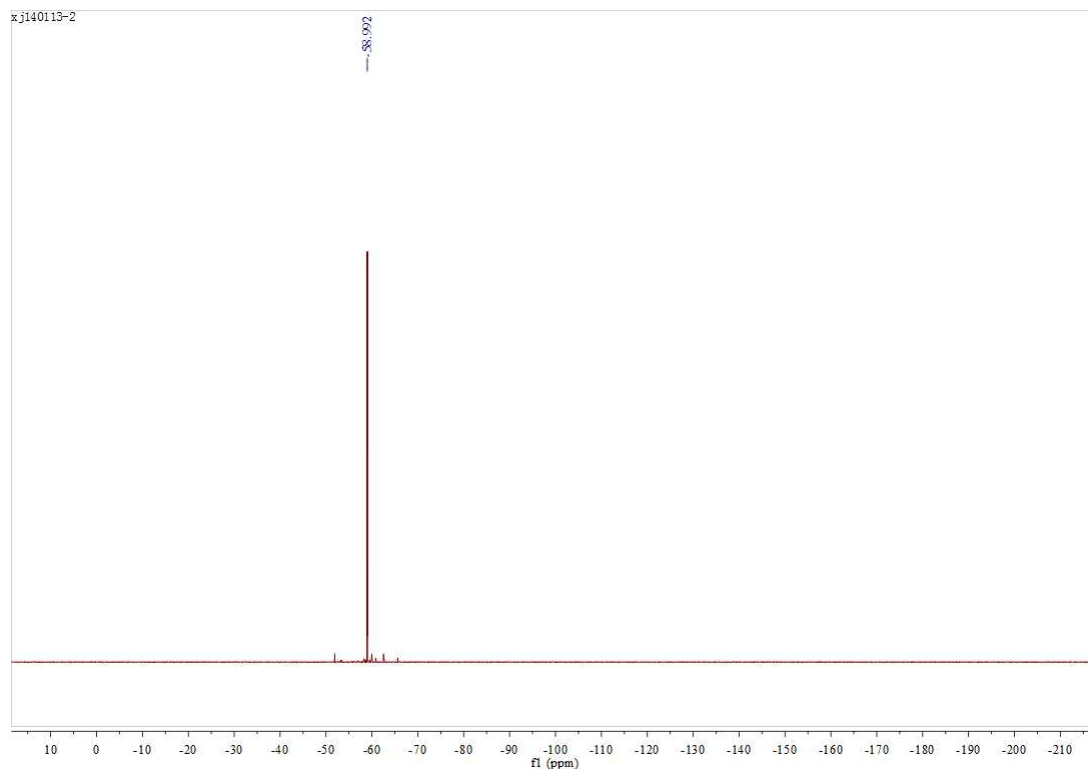

3-(2-(trifluoromethyl)-3,4-dihydronaphthalen-1-yl)oxazolidin-2-one (**3x**)

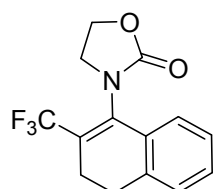

Prepared according to General Procedure E.

**<sup>1</sup>H NMR** (400 MHz, CDCl<sub>3</sub>) δ 7.34 – 7.26 (m, 2H), 7.21 (m, 2H), 4.67 – 4.48 (m, 2H), 3.90 (dd, *J* = 16.7, 8.5 Hz, 1H), 3.75 (dd, *J* = 15.3, 8.4 Hz, 1H), 2.99 – 2.89 (m, 2H), 2.73 – 2.59 (m, 2H).

**<sup>13</sup>C NMR** (100 MHz, CDCl<sub>3</sub>) δ 156.62, 136.99, 135.32 (*q*, *J* = 3.7 Hz), 130.25, 129.25, 128.21, 127.28, 125.97, 123.62, 123.39 (*q*, *J* = 271 Hz), 62.76, 47.17, 26.69, 22.45 (*q*, *J* = 2.3 Hz).

**<sup>19</sup>F NMR** (376 MHz, CDCl<sub>3</sub>) δ -63.87.

HRMS calcd for C<sub>14</sub>H<sub>12</sub>F<sub>3</sub>NO<sub>2</sub> ([M]<sup>+</sup>): 283.0820; found: 283.0824.

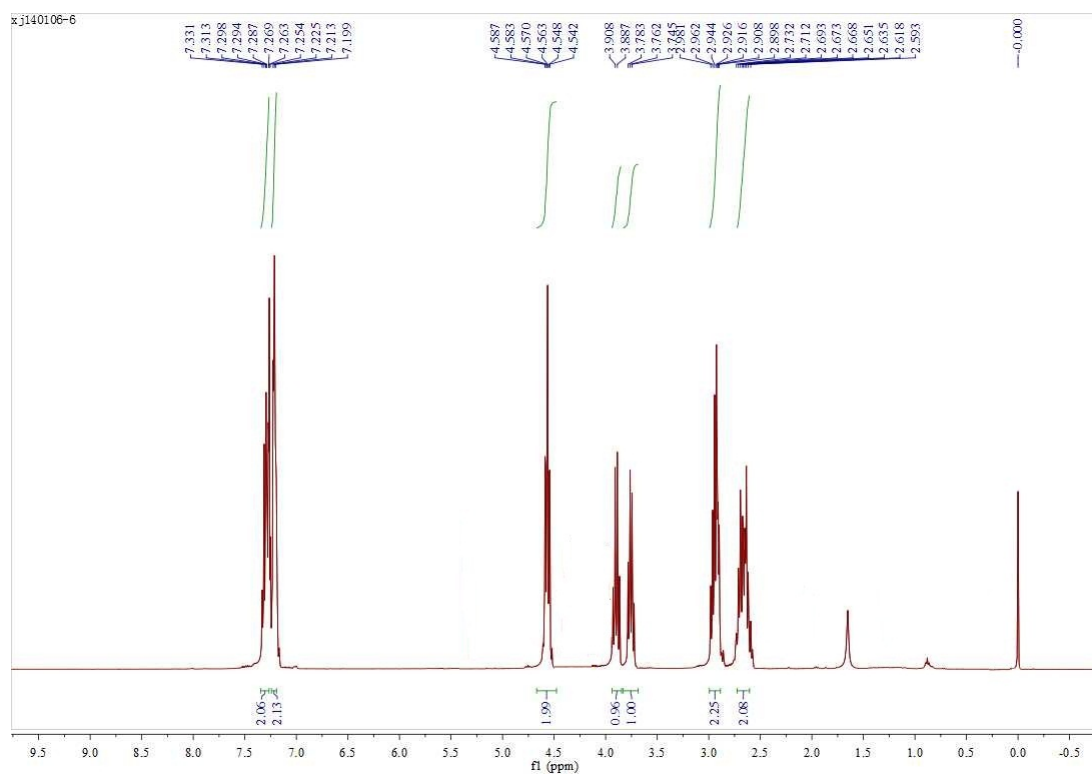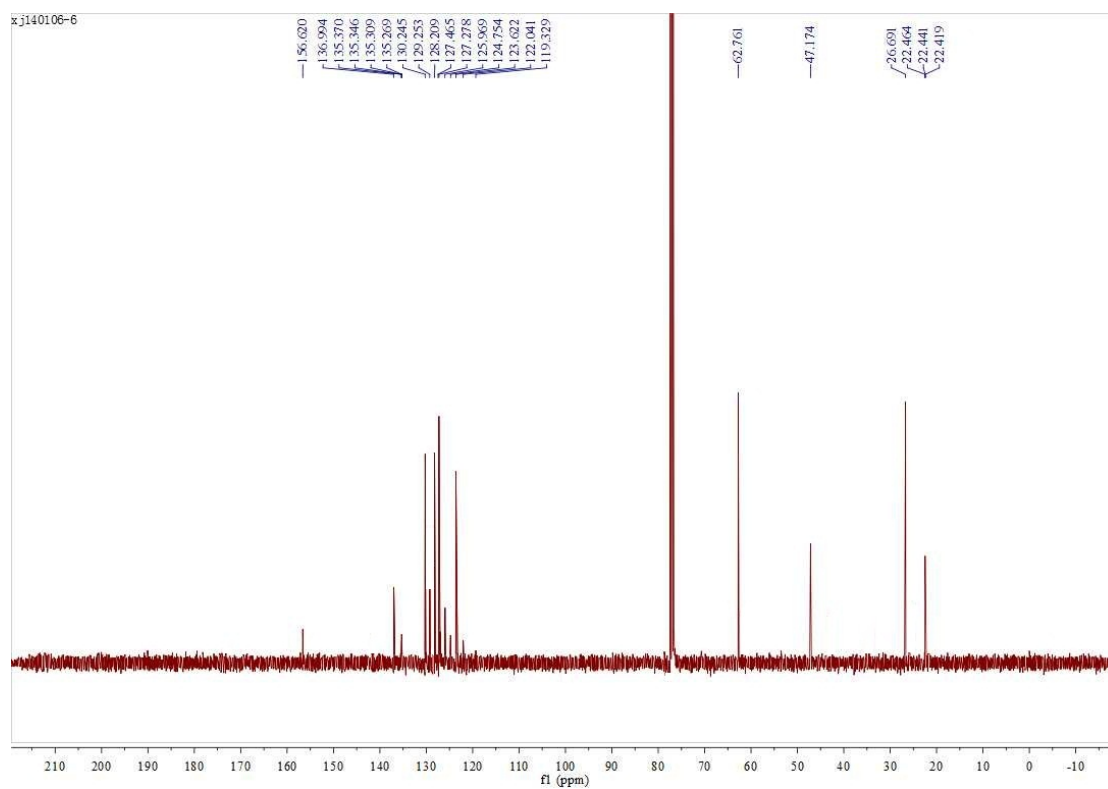



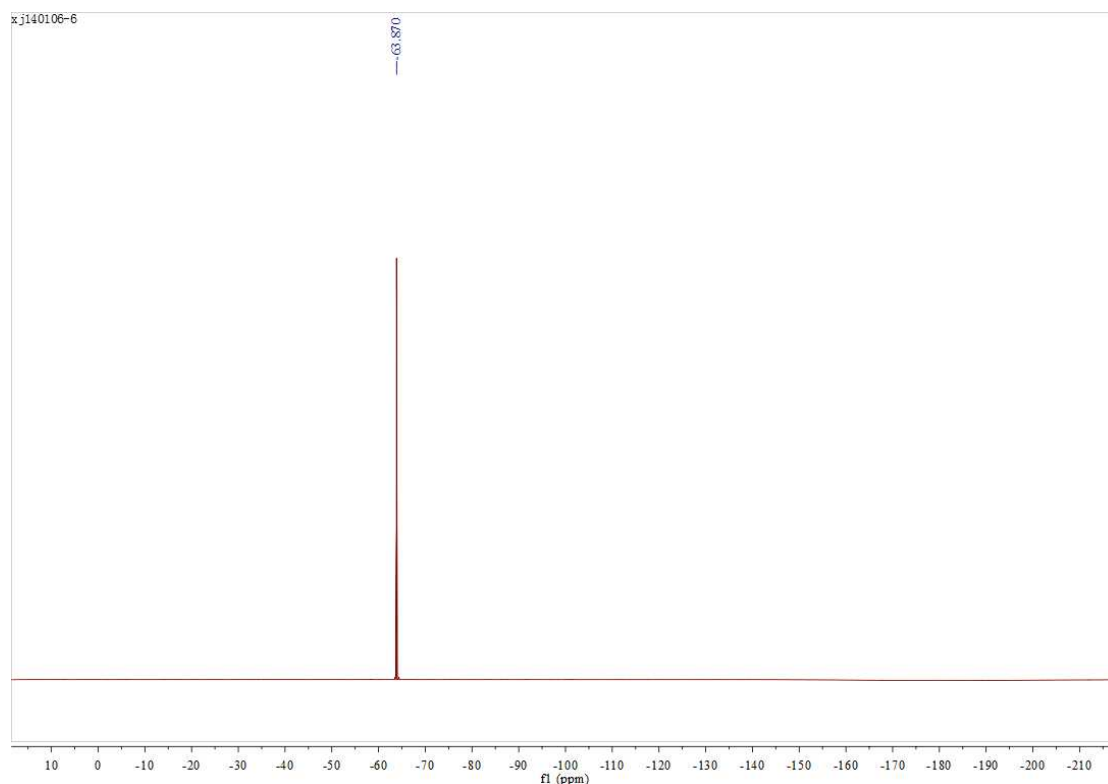

## IV. Synthetic Application

### 1. Representative Procedure for Aromatization<sup>2</sup>

To a solution of 4-(4-methoxyphenyl)-3-(trifluoromethyl)-1,2-dihydronaphthalene (**3a**, 0.2 mmol) in toluene (2 mL) was added 2,3-dichloro-5,6-dicyano-1,4-benzoquinone (2 equiv) and the mixture heated to reflux for 16 h. The reaction mixture was cooled to room temperature and quenched by addition of NaHCO<sub>3</sub>. The aqueous layer was separated and extracted with dichloromethane. The combined organics were washed with brine, dried (MgSO<sub>4</sub>) and the solvent removed in vacuo. Purification by flash chromatography gave **4a**.

1-(4-methoxyphenyl)-2-(trifluoromethyl)naphthalene (**4a**)

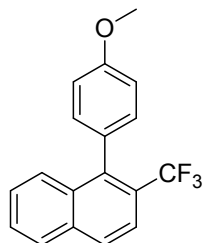

**<sup>1</sup>H NMR** (400 MHz, CDCl<sub>3</sub>) δ 7.93 (dd, *J* = 13.5, 8.5 Hz, 2H), 7.79 (d, *J* = 8.8 Hz, 1H), 7.57 (t, *J* = 6.6 Hz, 1H), 7.50 – 7.39 (m, 2H), 7.23 (d, *J* = 8.5 Hz, 2H), 7.02 (d, *J* = 8.8 Hz, 2H), 3.91 (s, 3H);

**<sup>13</sup>C NMR** (100 MHz, CDCl<sub>3</sub>) δ 159.25, 139.81, 134.55, 133.62, 131.25 (q, *J* = 1.3 Hz), 128.79, 127.97, 127.82, 127.66, 127.63, 126.82, 126.24 (q, *J* = 29 Hz), 124.45 (q, *J* = 273 Hz), 121.74 (q, *J* = 5.0 Hz), 113.22, 55.28;

**<sup>19</sup>F NMR** (376 MHz, CDCl<sub>3</sub>) δ -56.22.

HRMS calcd for C<sub>18</sub>H<sub>13</sub>F<sub>3</sub>O ([M]<sup>+</sup>): 302.0918; found: 302.0922.

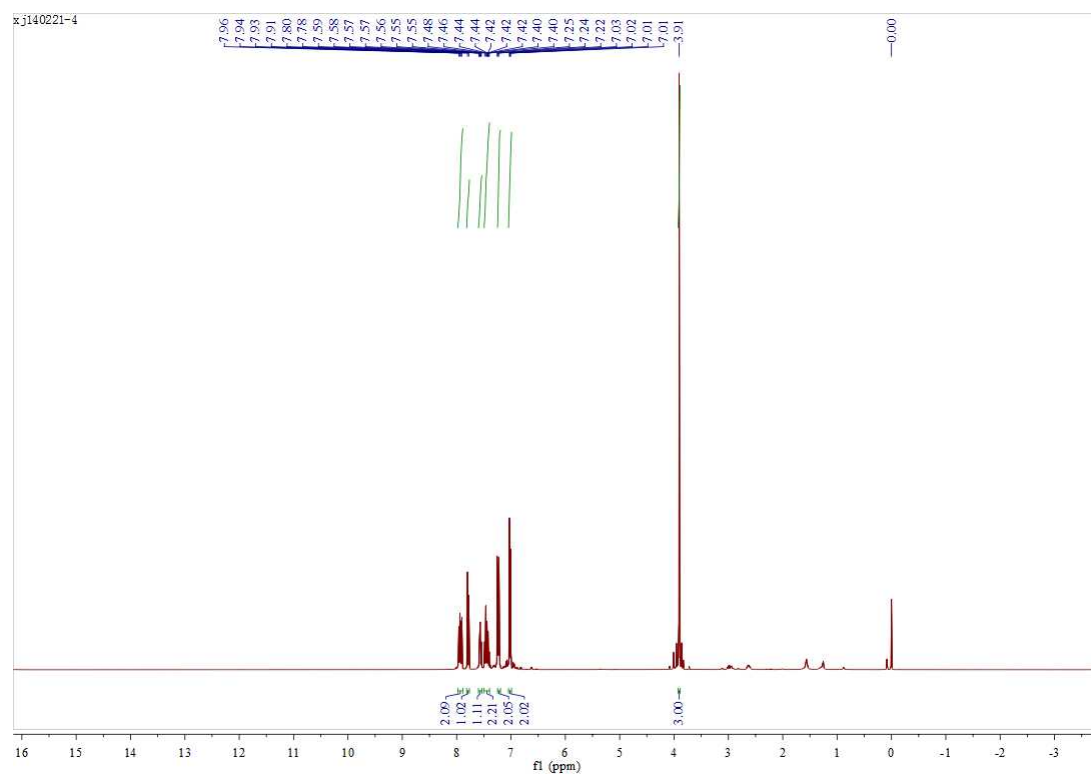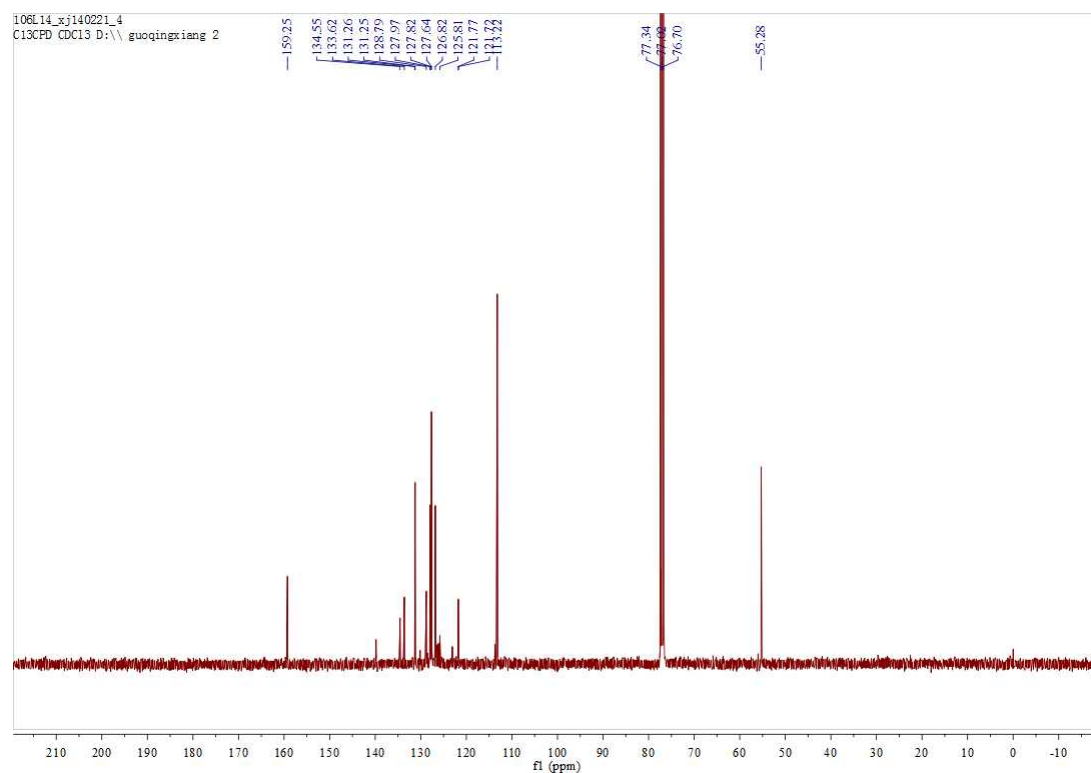

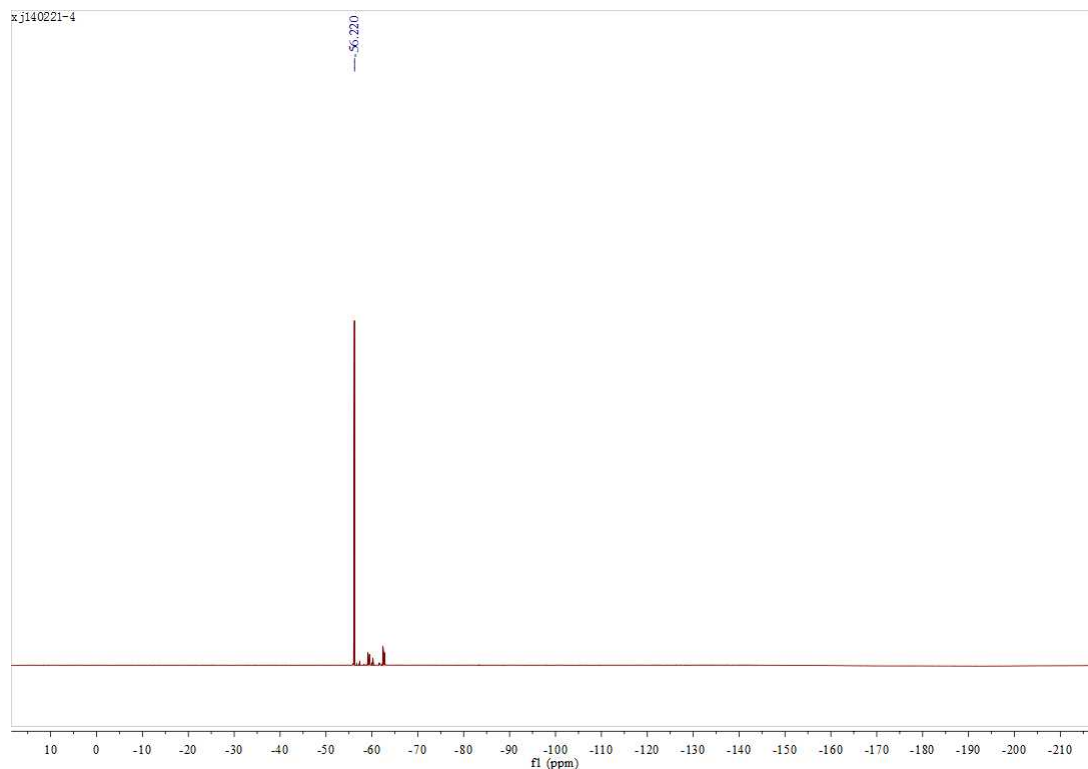

## 2. Representative Procedure for Epoxidation<sup>3</sup>

A solution of m-Chloroperbenzoic acid (70% w/w, 0.8 mmol, 4 equiv) in  $\text{CHCl}_3$  (2 mL) was added dropwise to a solution of 4-(4-methoxyphenyl)-3-(trifluoromethyl)-1,2-dihydronaphthalene (**3a**, 0.2 mmol) in  $\text{CHCl}_3$  (0.6 mL) at 0 °C, and the solution was warmed to room temperature. After the solution was stirred for 12 h,  $\text{CH}_2\text{Cl}_2$  (10 mL) was added, and the reaction mixture was washed with 2.5 M NaOH three times. The organic phase was dried over sodium sulfate and concentrated under reduced pressure, and purified by column chromatography on silica gel with petroleum ether / ethyl acetate to afford **5a**.

7b-(4-methoxyphenyl)-1a-(trifluoromethyl)-1a,2,3,7b-tetrahydronaphtho[1,2-b]oxirene (**5a**)

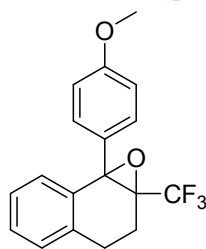

**<sup>1</sup>H NMR** (400 MHz,  $\text{CDCl}_3$ )  $\delta$  7.52 (dd,  $J$  = 8.5, 2.2 Hz, 1H), 7.25 (t,  $J$  = 7.4 Hz, 1H), 7.16 (d,  $J$  = 8.4, 2H), 7.06 (t,  $J$  = 7.6 Hz, 1H), 6.99 (dd,  $J$  = 8.5, 2.7 Hz, 1H), 6.91 (dd,  $J$  = 8.5, 2.7 Hz, 1H), 6.78 (d,  $J$  = 7.7 Hz, 1H), 3.86 (s, 3H), 3.09 – 2.97 (m, 1H), 2.85 – 2.75 (m, 1H), 2.66 (m, 1H), 2.28 (m, 1H);

**<sup>13</sup>C NMR** (100 MHz,  $\text{CDCl}_3$ )  $\delta$  159.38, 136.77, 134.00, 130.68, 129.51, 129.05, 128.86, 128.36, 126.35, 126.26, 123.90 (q,  $J$  = 278 Hz), 113.69, 113.26, 66.38 (q,  $J$  = 35 Hz), 64.41, 55.26, 25.26, 20.70;

**<sup>19</sup>F NMR** (376 MHz,  $\text{CDCl}_3$ )  $\delta$  -70.09.

HRMS calcd for  $C_{18}H_{15}F_3O_2$  ( $[M]^+$ ): 320.1024; found: 320.1029.

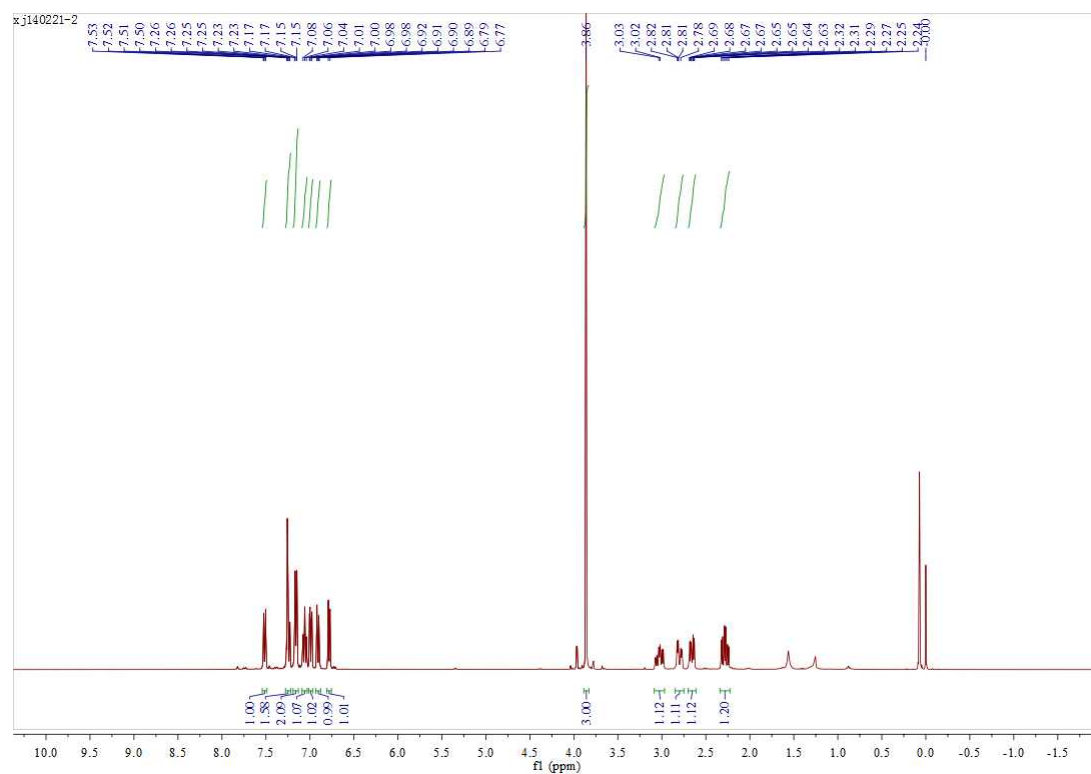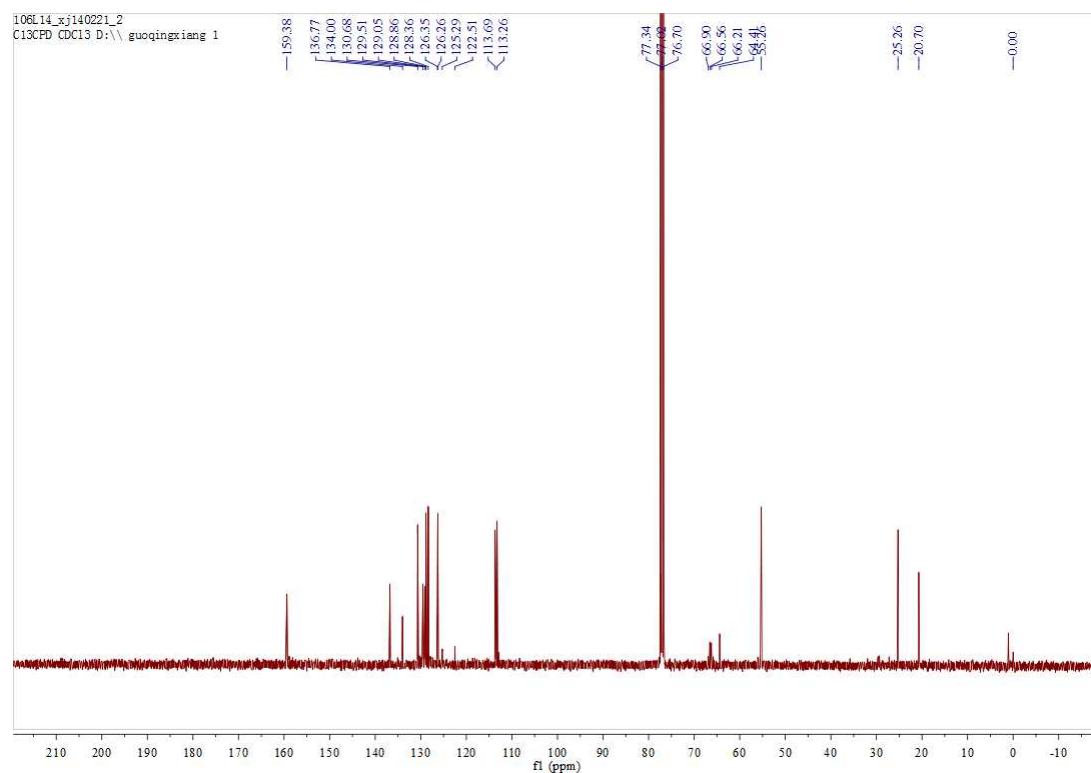

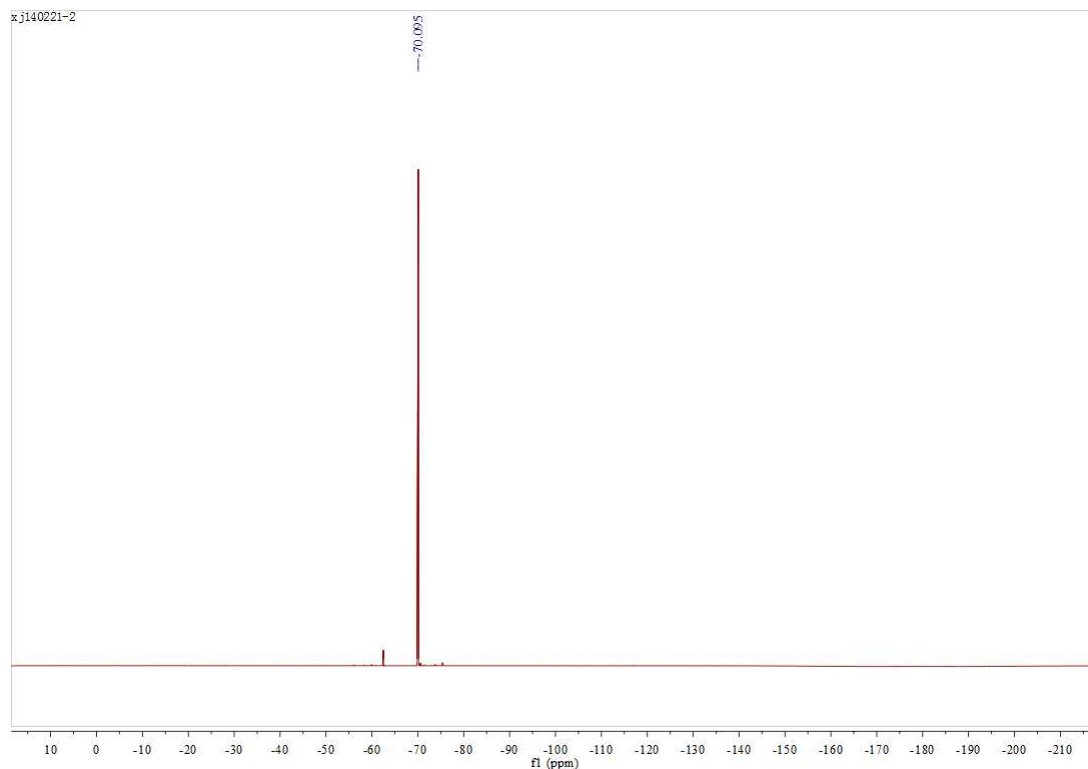

### 3. Representative Procedure for Hydrogenation<sup>4</sup>

An oven-dried reaction tube was charged with a magnetic stir-bar, **3a** (0.2 mmol), and 5% Pd on carbon (18 mg). The vessel was sealed before being evacuated and filled with argon, and then methanol (2 ml) and THF (0.2 ml) was added. The reaction was stirred at room temperature under H<sub>2</sub> atmosphere (345 kpa) for 12 h. At the conclusion of the reaction, water was added to the mixture at room temperature. The resulting mixture was extracted by ethyl acetate three times, and the combined organic phase was washed with brine for once and then dried over magnesium sulfate. After filtration and evaporation of the solvent, the crude mixture was purified by column chromatography on silica gel with petroleum ether/ethyl acetate to yield the products **6a**.

#### 1-(4-methoxyphenyl)-2-(trifluoromethyl)-1,2,3,4-tetrahydronaphthalene (**6a**)

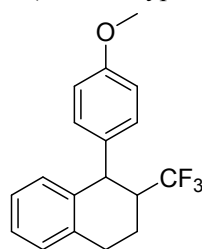

**<sup>1</sup>H NMR** (400 MHz, CDCl<sub>3</sub>)  $\delta$  7.21 – 7.13 (m, 2H), 7.07 (t,  $J$  = 7.3 Hz, 1H), 6.99 – 6.90 (m, 3H), 6.81 – 6.73 (m, 2H), 4.46 (d,  $J$  = 4.2 Hz, 1H), 3.75 (d,  $J$  = 1.5 Hz, 3H), 3.15 – 3.07 (m, 1H), 3.04 – 2.93 (m, 1H), 2.77 – 2.69 (m, 1H), 2.09 – 1.94 (m, 2H);

**<sup>13</sup>C NMR** (100 MHz, CDCl<sub>3</sub>)  $\delta$  158.33, 138.24, 135.05, 133.66, 131.40 (q,  $J$  = 8.7 Hz), 130.63, 128.85, 127.28, 126.62, 126.39, 113.25, 55.13, 44.20 (q,  $J$  = 25 Hz), 42.91 (q,  $J$  = 1.8 Hz), 28.25, 17.05 (q,  $J$  = 2.3 Hz);

**<sup>19</sup>F NMR** (376 MHz, CDCl<sub>3</sub>)  $\delta$  -68.20 (d,  $J$  = 11.3 Hz), -68.22 (d,  $J$  = 11.3 Hz).

HRMS calcd for C<sub>18</sub>H<sub>17</sub>F<sub>3</sub>O ([M]<sup>+</sup>): 306.1231; found: 306.1235.

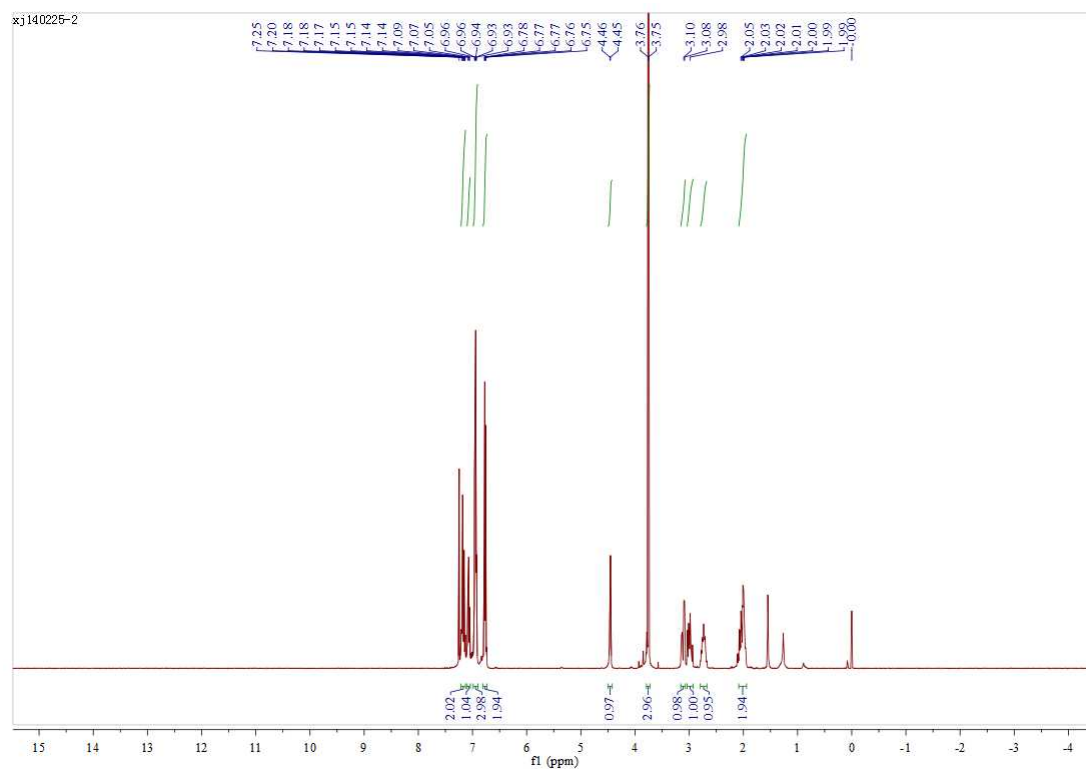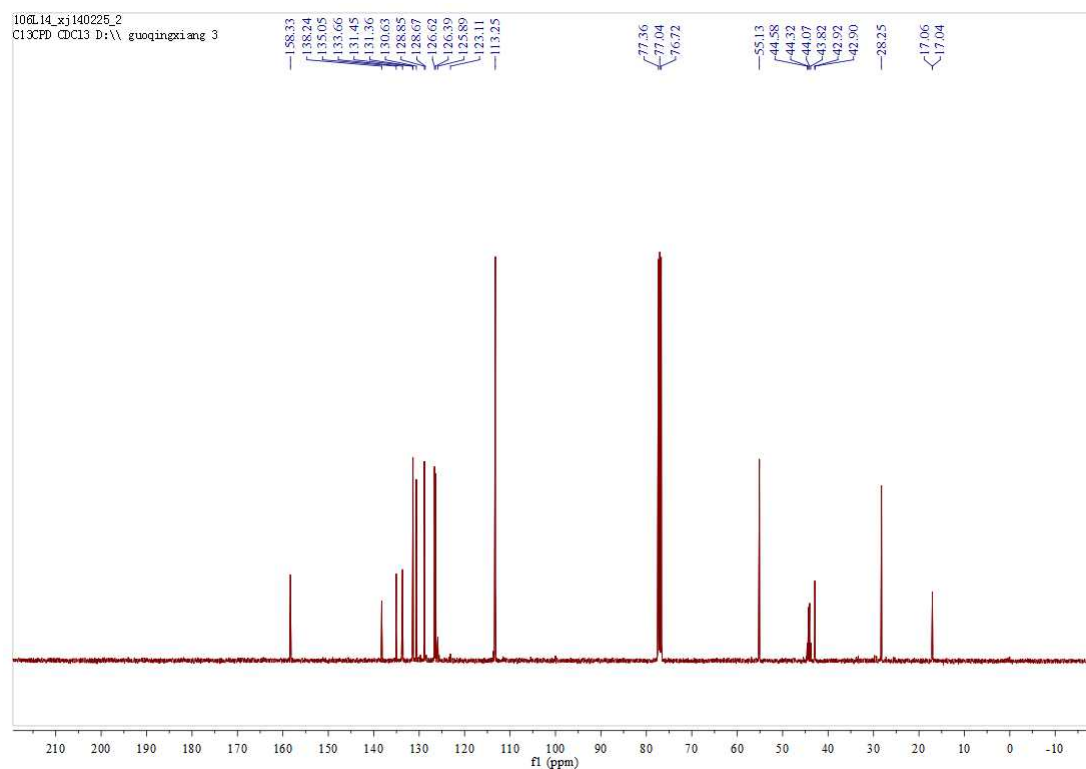

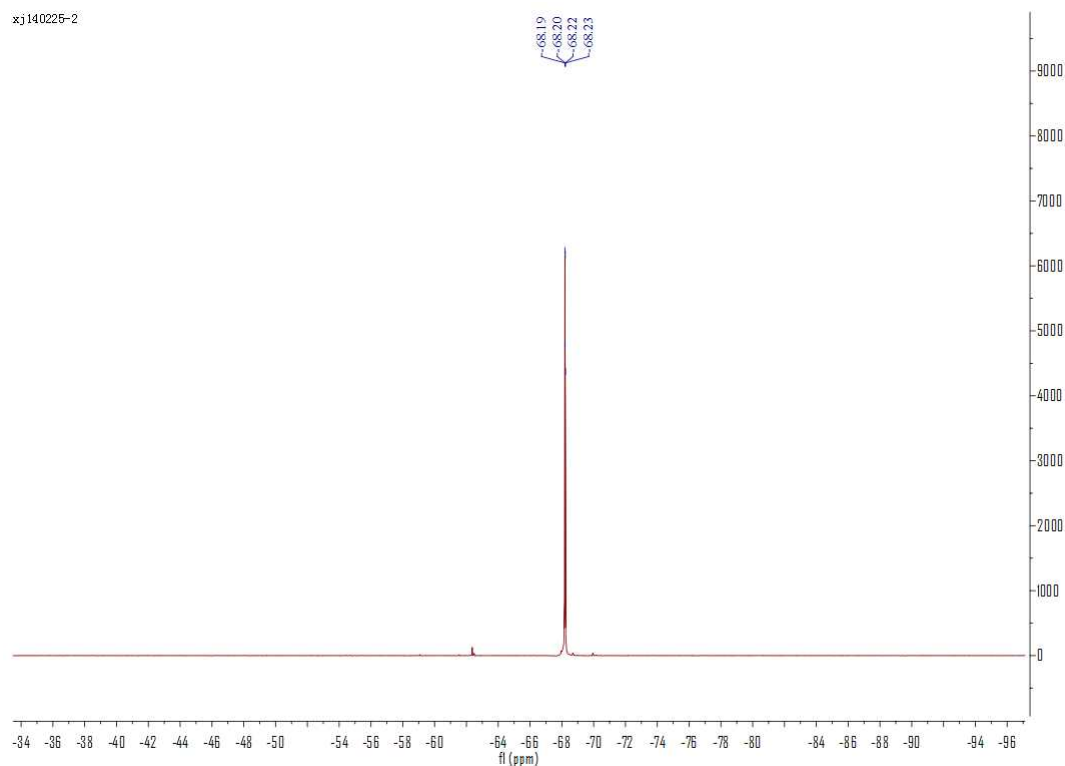

#### 4. Synthesis of Nafoxidine derivative 8

1-(4-(4-(2-Chloroethoxy)phenyl)but-3-yn-1-yl)-3-methoxybenzene (**7**) was prepared according to the literature<sup>1</sup>.

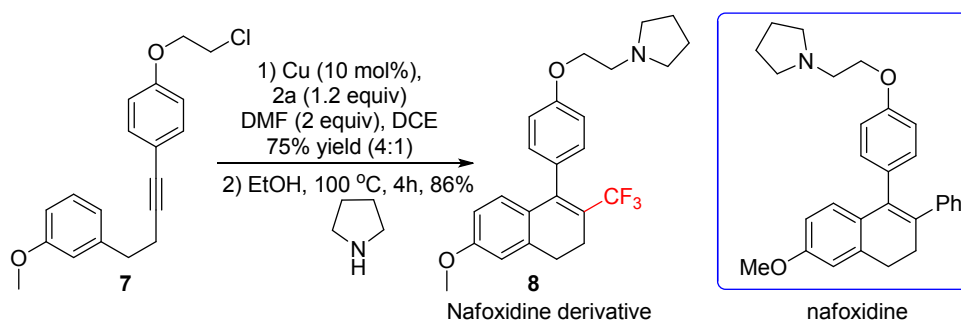

4-(4-(2-chloroethoxy)phenyl)-7-methoxy-3-(trifluoromethyl)-1,2-dihydronaphthalene (**A**)

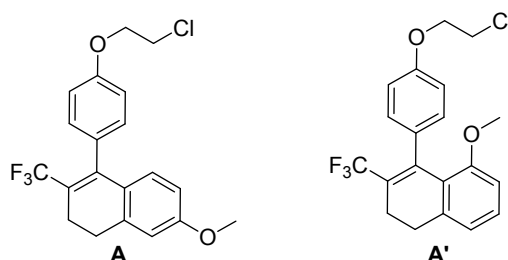

Prepared according to General Procedure **D**. A reaction tube was charged with Cu (2.56 mg, 10 mmol%), **1A** (0.4 mmol) and **2a** (0.48 mmol, 163.2 mg), the vessel was sealed before being evacuated and filled with argon (three times). DMF (0.8 mmol, 61.6  $\mu$ L), and DCE (2 mL) were added in turn by syringe under an argon atmosphere. After addition of all substrates, the reaction

mixture was kept for 24 h at 80 °C. At the conclusion of the reaction, water was added to the mixture at room temperature. The resulting mixture was extracted by ethyl acetate three times, and the combined organic phase was washed with brine for once and then dried over magnesium sulfate. After filtration and evaporation of the solvent, the crude mixture was purified by column chromatography on silica gel with petroleum ether/ethyl acetate to yield the products **A** as a white solid. The isomer **A'** was isolated as a mixture with **A** (1:4) to give an overall isolated yield of 75%.

Characterisation data for major isomer (**A**):

**<sup>1</sup>H NMR** (400 MHz, CDCl<sub>3</sub>) δ 7.09 (d, *J* = 8.5 Hz, 2H), 6.94 (d, *J* = 8.6 Hz, 2H), 6.74 (d, *J* = 1.6 Hz, 1H), 6.64 – 6.54 (m, 2H), 4.27 (t, *J* = 5.9 Hz, 2H), 3.85 (t, *J* = 5.9 Hz, 2H), 3.79 (s, 3H), 2.91 (t, *J* = 8.0 Hz, 2H), 2.58 (t, *J* = 7.9 Hz, 2H).

**<sup>13</sup>C NMR** (100 MHz, CDCl<sub>3</sub>) δ 159.98, 157.55, 141.33 (q, *J* = 4.1 Hz), 138.09, 130.39, 130.28 (q, *J* = 1.8 Hz), 129.30, 128.21, 124.55 (q, *J* = 271 Hz), 121.97 (q, *J* = 28.4 Hz), 114.14, 113.33, 111.23, 67.96, 55.31, 41.97, 28.22, 22.50 (q, *J* = 2.6 Hz).

**<sup>19</sup>F NMR** (376 MHz, CDCl<sub>3</sub>) δ -58.68.

HRMS calcd for C<sub>20</sub>H<sub>18</sub>ClF<sub>3</sub>O<sub>2</sub> ([M]<sup>+</sup>): 382.0947; found: 382.0949.

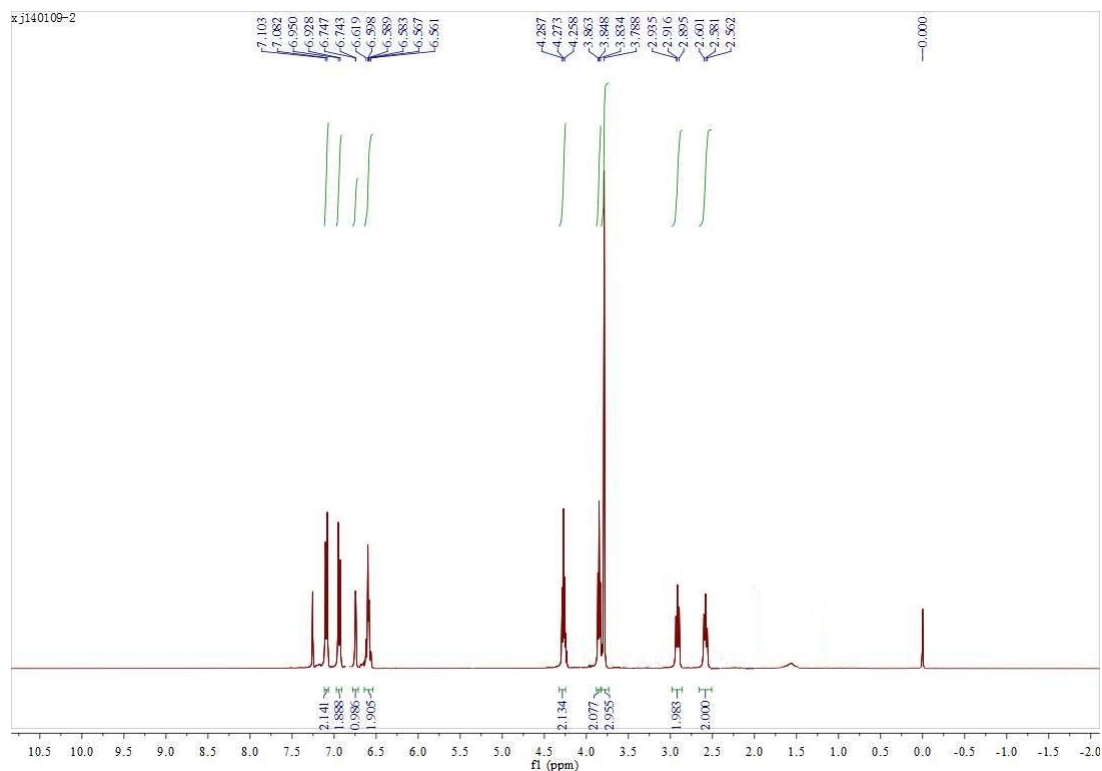



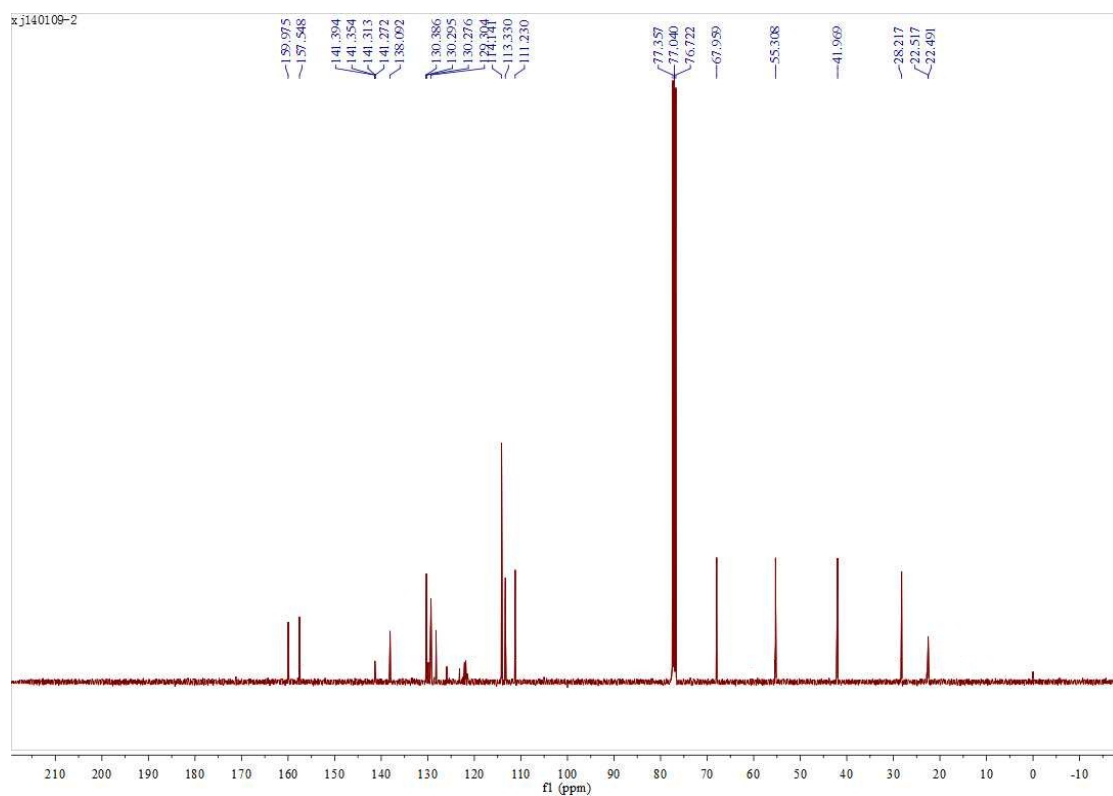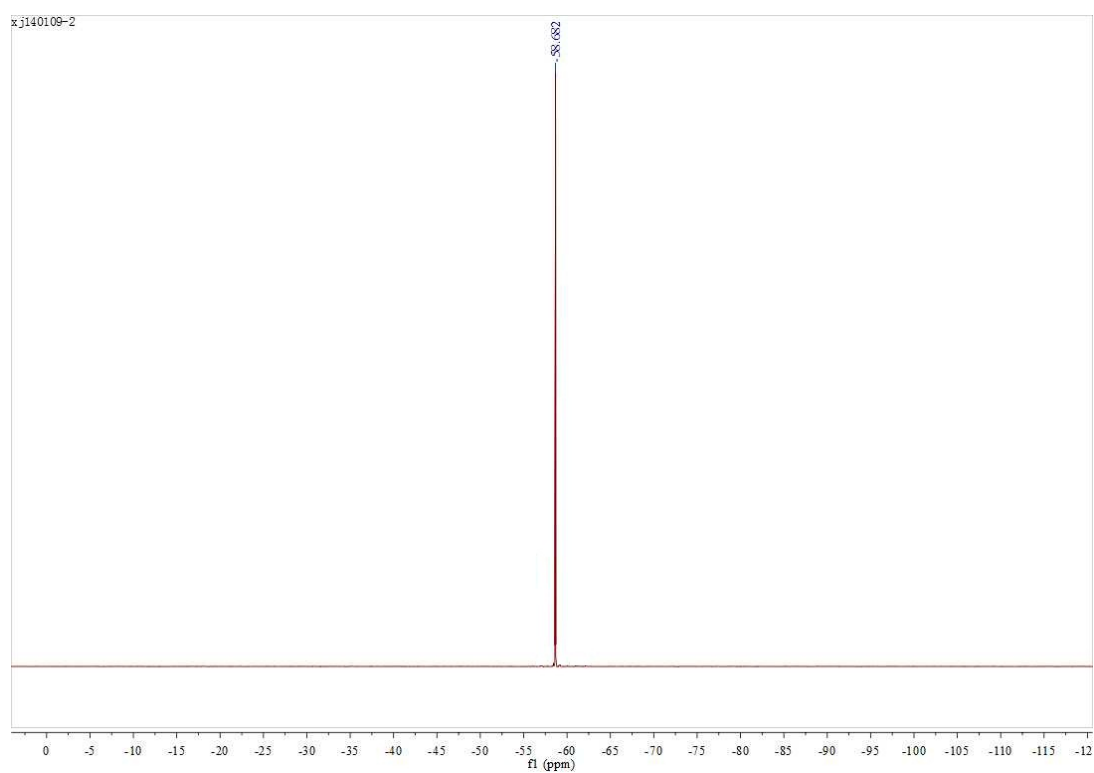

1-(2-(4-(6-methoxy-2-(trifluoromethyl)-3,4-dihydronaphthalen-1-yl)phenoxy)ethyl)pyrrolidine (**8**)

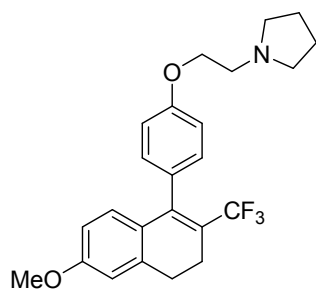

4-(4-(2-chloroethoxy)phenyl)-7-methoxy-3-(trifluoromethyl)-1,2-dihydronaphthalene (**A**) (76.4 mg, 0.2 mmol) was dissolved in ethanol (0.25 mL) and pyrrolidine (0.25 mL) and the mixture heated in a sealed tube for 4 h. The reaction mixture was cooled to room temperature and the solvent removed in vacuo. The residue was purified by flash chromatography on basic alumina to give compound **7** (71.7 mg, 86%) as a pale yellow solid.

**<sup>1</sup>H NMR** (400 MHz, CDCl<sub>3</sub>) δ 7.07 (d, *J* = 8.6 Hz, 2H), 6.94 (d, *J* = 8.7 Hz, 2H), 6.74 (d, *J* = 2.3 Hz, 1H), 6.64 – 6.56 (m, 2H), 4.20 (t, *J* = 5.8 Hz, 2H), 3.79 (s, 3H), 3.01– 2.98 (m, 2H), 2.95 – 2.87 (m, 2H), 2.80 – 2.72 (m, 4H), 2.58 (m, 2H), 1.91 – 1.84 (m, 4H).

**<sup>13</sup>C NMR** (100 MHz, CDCl<sub>3</sub>) δ 159.92, 158.00, 141.47 (q, *J* = 4.2 Hz), 138.07, 130.15 (q, *J* = 1.8 Hz), 129.79, 129.36, 128.29, 124.57 (q, *J* = 272 Hz), 121.83 (q, *J* = 30.4 Hz), 114.00, 113.29, 111.20, 66.50, 55.30, 54.99, 54.72, 28.22, 23.48, 22.50 (q, *J* = 2.7 Hz).

**<sup>19</sup>F NMR** (376 MHz, CDCl<sub>3</sub>) δ -58.68.

HRMS calcd for C<sub>11</sub>H<sub>9</sub>F<sub>3</sub>O ([M]<sup>+</sup>): 417.1916; found: 417.1921.

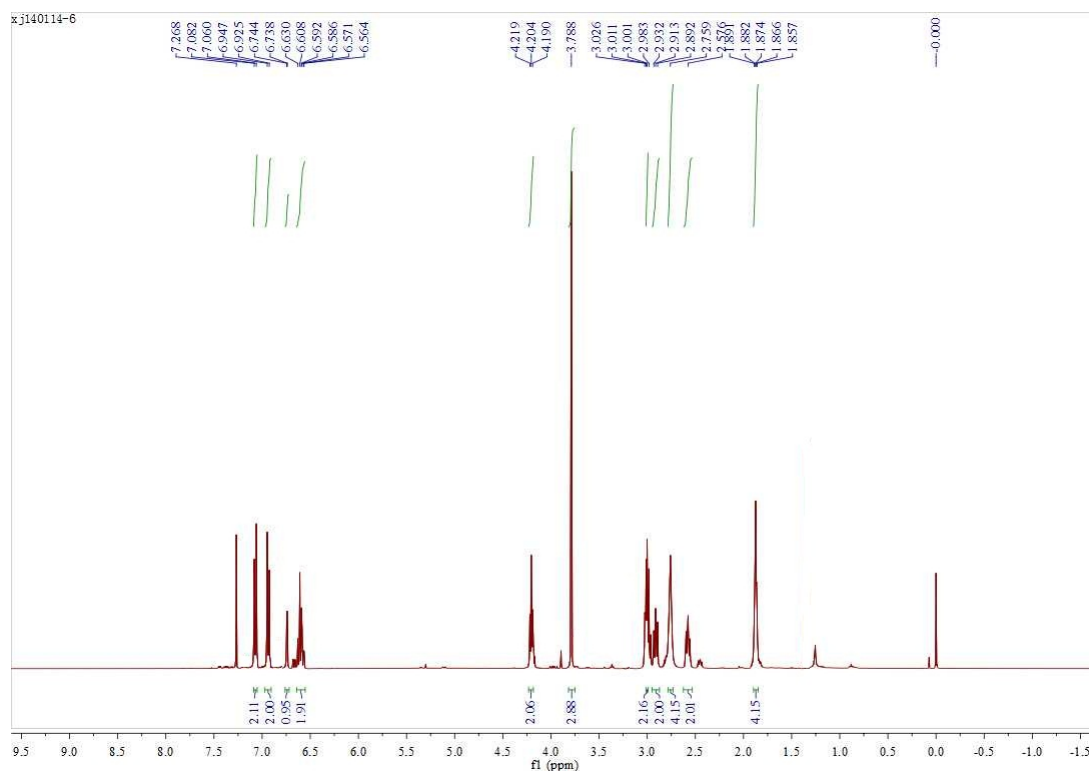

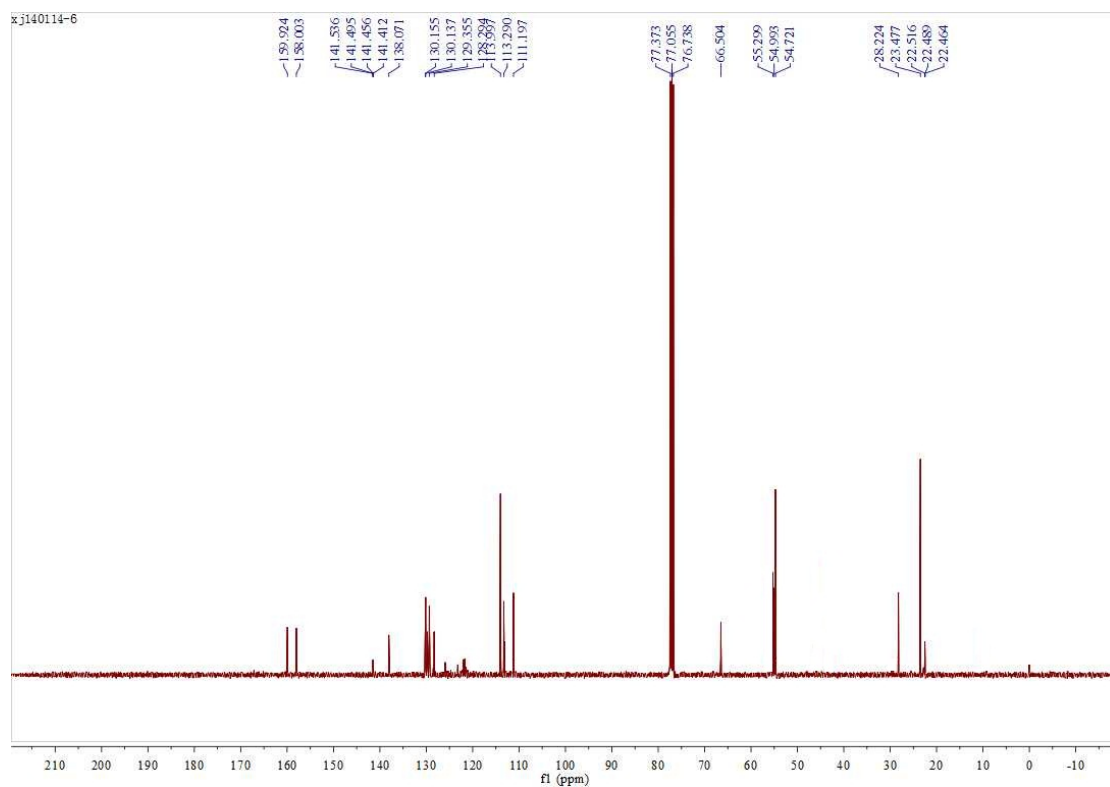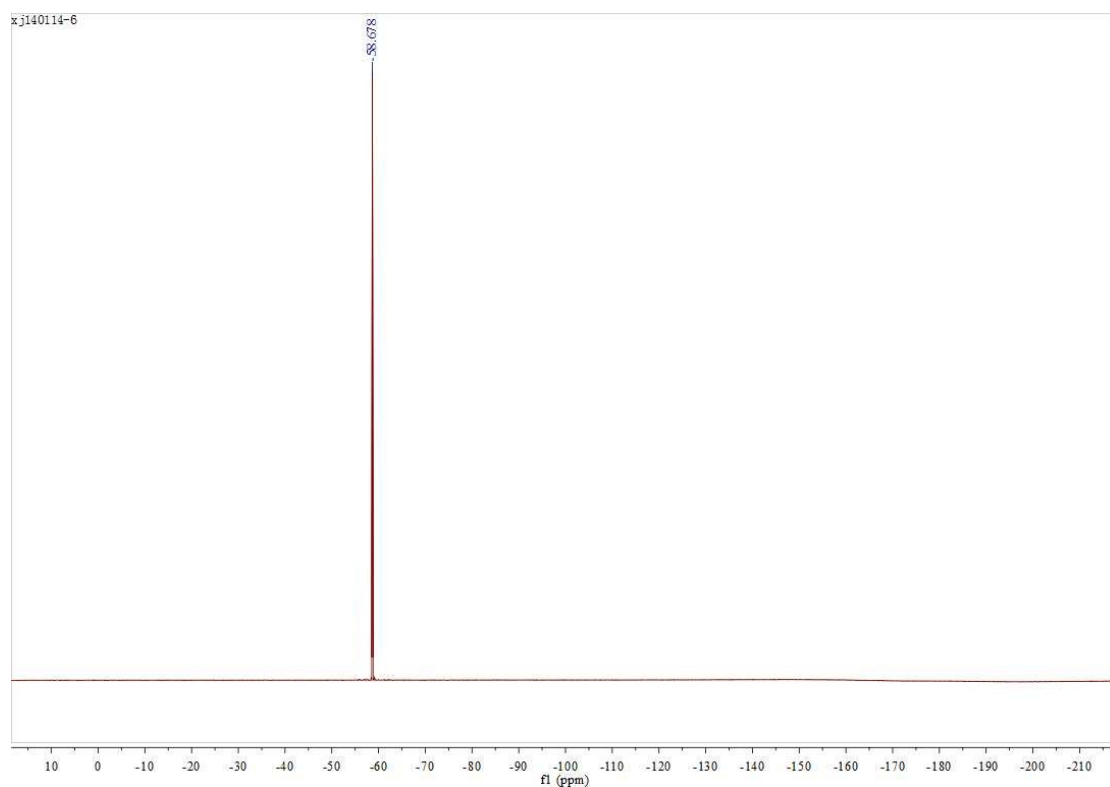

## V. Mechanistic Study

### 1. capture of the CF<sub>3</sub> radical.

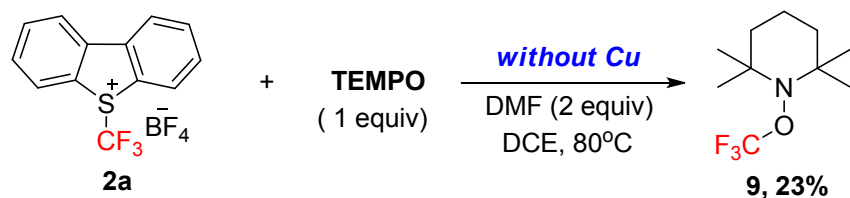

An oven-dried reaction tube was charged with a magnetic stir-bar, **2a** (0.1 mmol, 34 mg), TEMPO (0.1 mmol, 15.6 mg). The vessel was sealed before being evacuated and filled with argon (three times). DMF (0.4 mmol, 30.8  $\mu$ L), and DCE (1 mL) were added in turn by syringe under an argon atmosphere. After addition of all substrates, the reaction mixture was kept for 1 h at the 80°C. Then, the stirring was stopped, and PhCF<sub>3</sub> (0.1 mmol, 12.5  $\mu$ L) was added to the reaction mixture. <sup>19</sup>F NMR analysis of this reaction mixture showed that TEMPO-CF<sub>3</sub> was formed [<sup>19</sup>F NMR (376 MHz, CDCl<sub>3</sub>)  $\delta$  -55.61] in 23% <sup>19</sup>F NMR yield. <sup>19</sup>F NMR spectrum was matching with literature data.

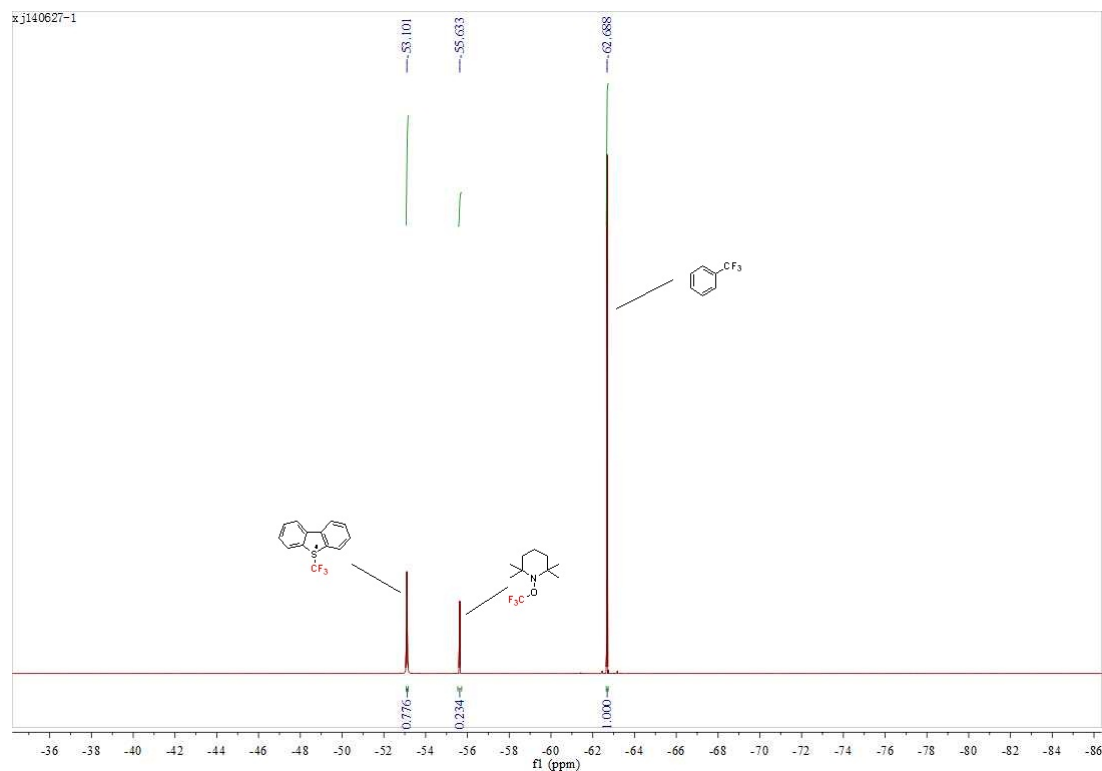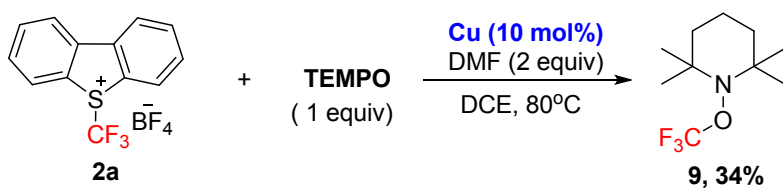

evacuated and filled with argon (three times). DMF (0.4 mmol, 30.8  $\mu$ L), and DCE (1 mL) were added in turn by syringe under an argon atmosphere. After addition of all substrates, the reaction mixture was kept for 1 h at the 80°C. Then, the stirring was stopped, and  $\text{PhCF}_3$  (0.1 mmol, 12.5  $\mu$ L) was added to the reaction mixture.  $^{19}\text{F}$  NMR analysis of this reaction mixture showed that TEMPO- $\text{CF}_3$  was formed [ $^{19}\text{F}$ NMR (376 MHz,  $\text{CDCl}_3$ )  $\delta$  -55.61] in 34%  $^{19}\text{F}$  NMR yield.  $^{19}\text{F}$  NMR spectrum was matching with literature data.

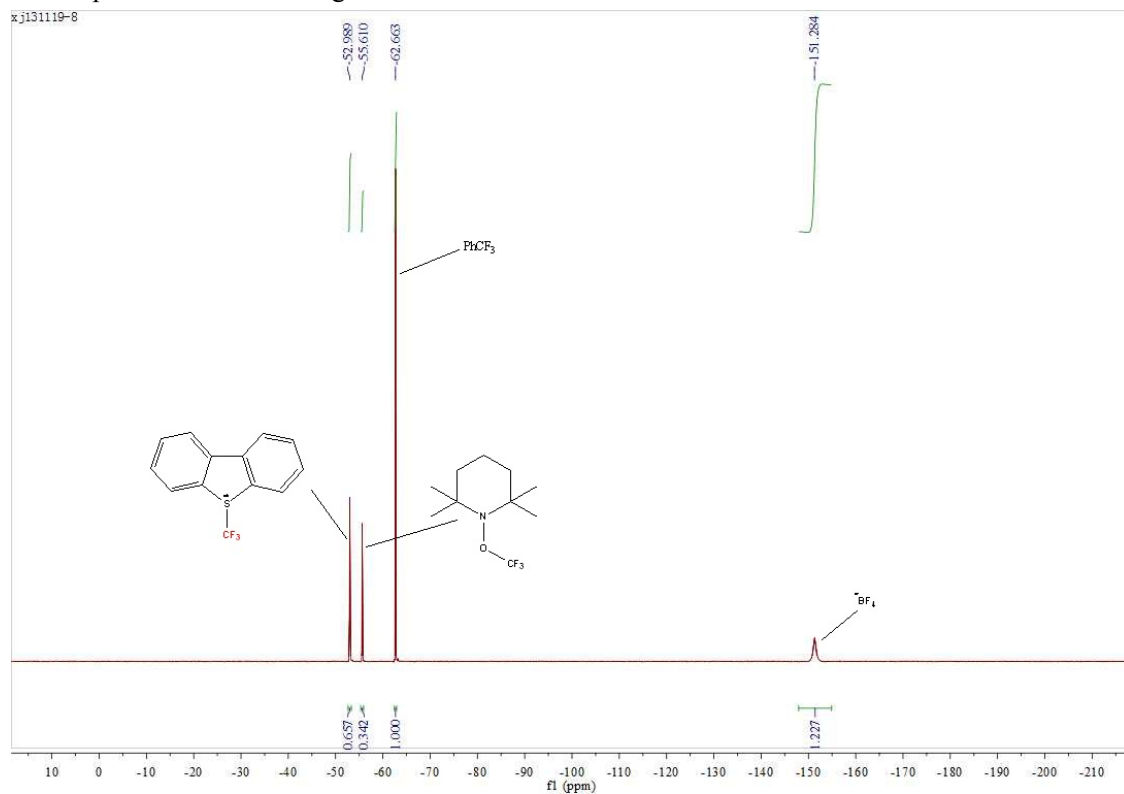

RT: 1.48 - 15.55

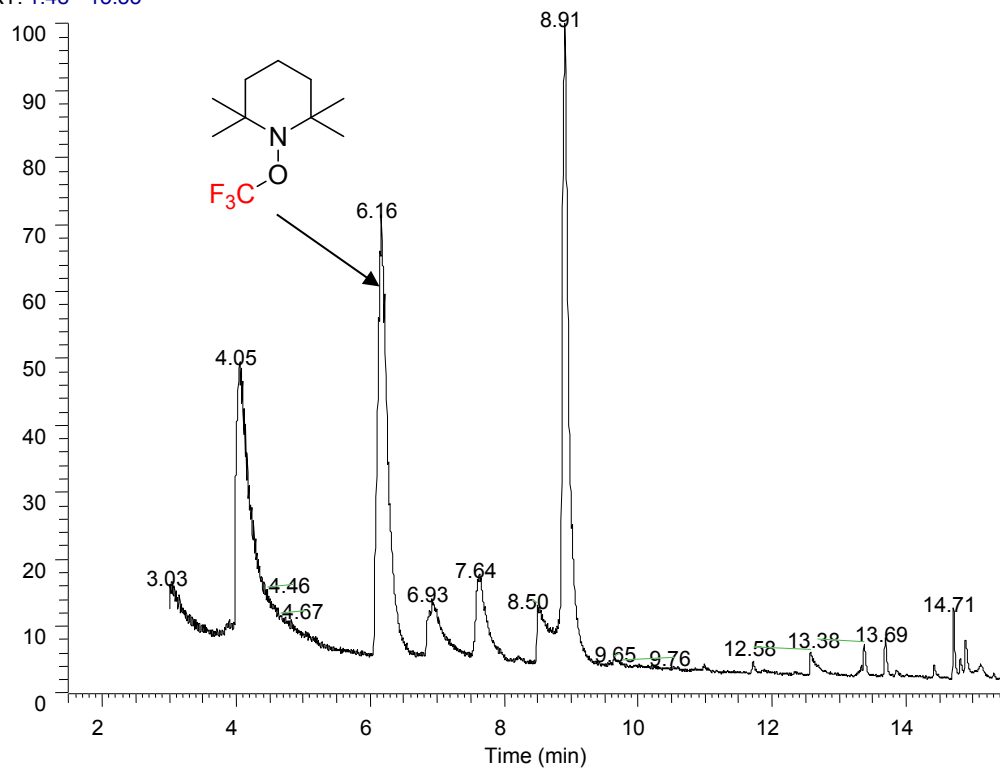

NL:  
2.07E6  
TIC MS

xj140307-1 #1015 RT: 6.17 AV: 1 NL: 2.94E5  
T: + c Full ms [20.00-650.00]

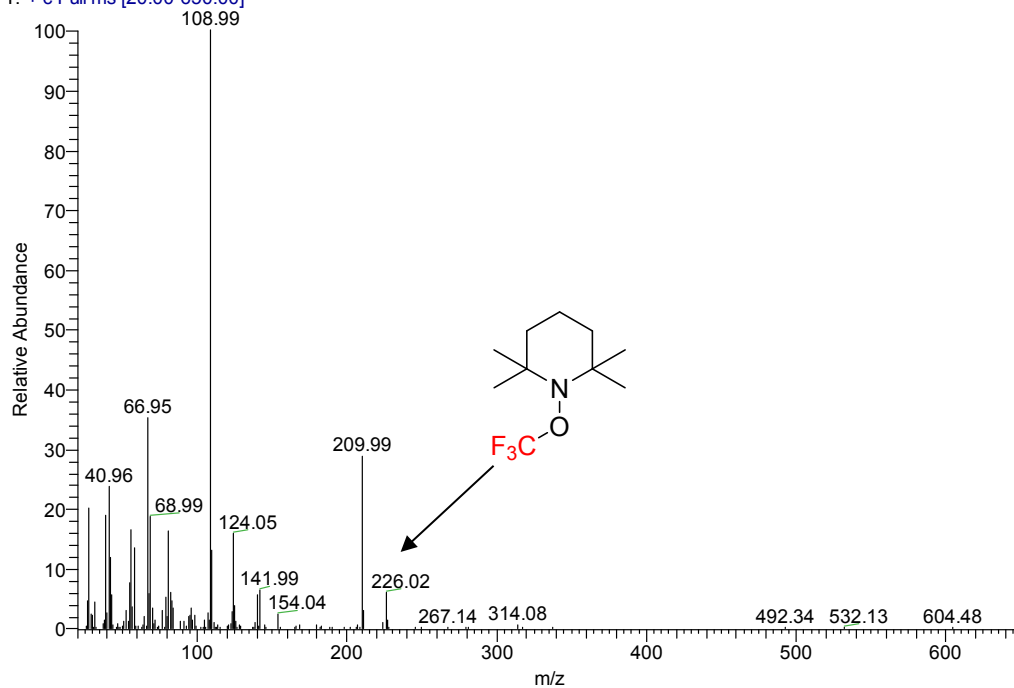

## 2. isotope labeling experiments

### a. intramolecular isotope labeling experiments.

A reaction tube was charged with Cu (1.28 mg, 10 mmol%), **d<sub>1</sub>-1I** (0.2 mmol, 47.8 mg) and **2a** (0.24 mmol, 81.7 mg), the vessel was sealed before being evacuated and filled with argon (three times). DMF (0.4 mmol, 30.8  $\mu$ L), and DCE (1 mL) were added in turn by syringe under an argon atmosphere. After addition of all substrates, the reaction mixture was kept for 24 h at 80°C. At the conclusion of the reaction, water was added to the mixture at room temperature. The resulting mixture was extracted by ethyl acetate three times, and the combined organic phase was washed with brine for once and then dried over magnesium sulfate. After filtration and evaporation of the solvent, the crude mixture was purified by column chromatography on silica gel with petroleum ether/ethyl acetate to yield the products **3I** and **d<sub>1</sub>-3I**. The  $K_H/K_D$  was determined by the analysis followed by Yu et al. The ratio **3I** and **d<sub>1</sub>-3I** was analyzed by  $^1\text{H}$  NMR. The yield of **3I**, **X**, was determined by integration of the  $H_b$  signal of **3I**, which appeared as a doublets approximately at 6.96 ppm. The total yield of **3I** and **d<sub>1</sub>-3I**, **Y** was determined by integration of  $H_a$  of **3I** and **d<sub>1</sub>-3I**, which appeared as d at 6.72 ppm. The yield of **d<sub>1</sub>-3I**, **Z**, could then be determined from the following formula:  $Z = Y - X$ . Then  $K_H/K_D = Z/X = 0.46/0.54 = 0.85$

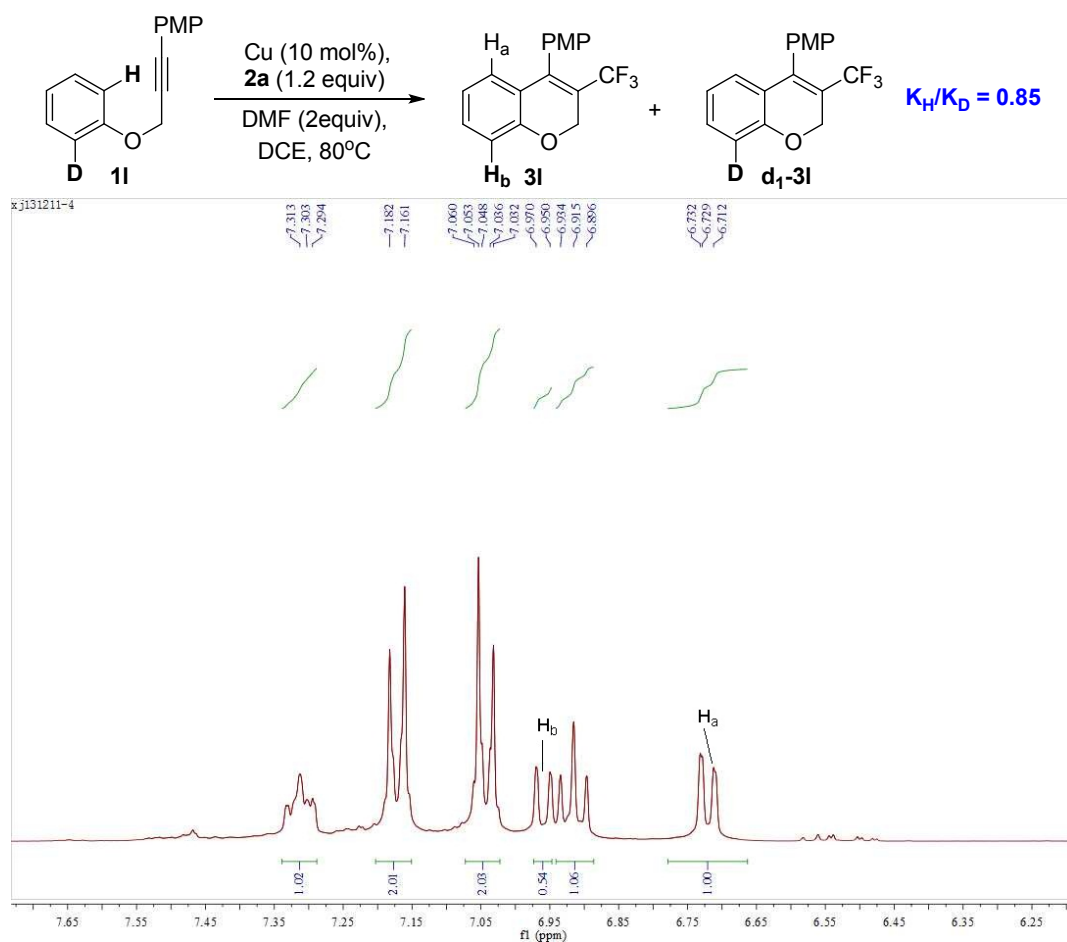

## b. intermolecular isotope labeling experiments.

A reaction tube was charged with Cu (1.28 mg, 10 mmol%), **d<sub>5</sub>-1I** (0.2 mmol, 47.8 mg) and **2a** (0.24 mmol, 81.7 mg), the vessel was sealed before being evacuated and filled with argon (three times). DMF (0.4 mmol, 30.8  $\mu$ L), and DCE (1 mL) were added in turn by syringe under an argon atmosphere. After addition of all substrates, the reaction mixture was kept for 24 h at 80°C. At the conclusion of the reaction, water was added to the mixture at room temperature. The resulting mixture was extracted by ethyl acetate three times, and the combined organic phase was washed with brine for once and then dried over magnesium sulfate. After filtration and evaporation of the solvent, the crude mixture was purified by column chromatography on silica gel with petroleum ether/ethyl acetate to yield the products **3I** and **d<sub>4</sub>-3I**. The  $K_H/K_D$  was determined by the analysis followed by Yu et al.<sup>5</sup> The ratio **3I** and **d<sub>4</sub>-3I** was analyzed by <sup>1</sup>H NMR. The yield of **3I**, **X**, was determined by integration of the H<sub>a</sub> signal of **3I**, which appeared as a doublets approximately at 6.72 ppm. The total yield of **3I** and **d<sub>4</sub>-3I**, **Y** was determined by integration of H<sub>b</sub> of **3I** and **d<sub>4</sub>-3I**, which appeared as d at 7.04 ppm. The yield of **d<sub>4</sub>-3I**, **Z**, could then be determined from the following formula:  $Z = Y - X$ . Then  $K_H/K_D = X/Z = 0.55/0.45 = 1.2$ .

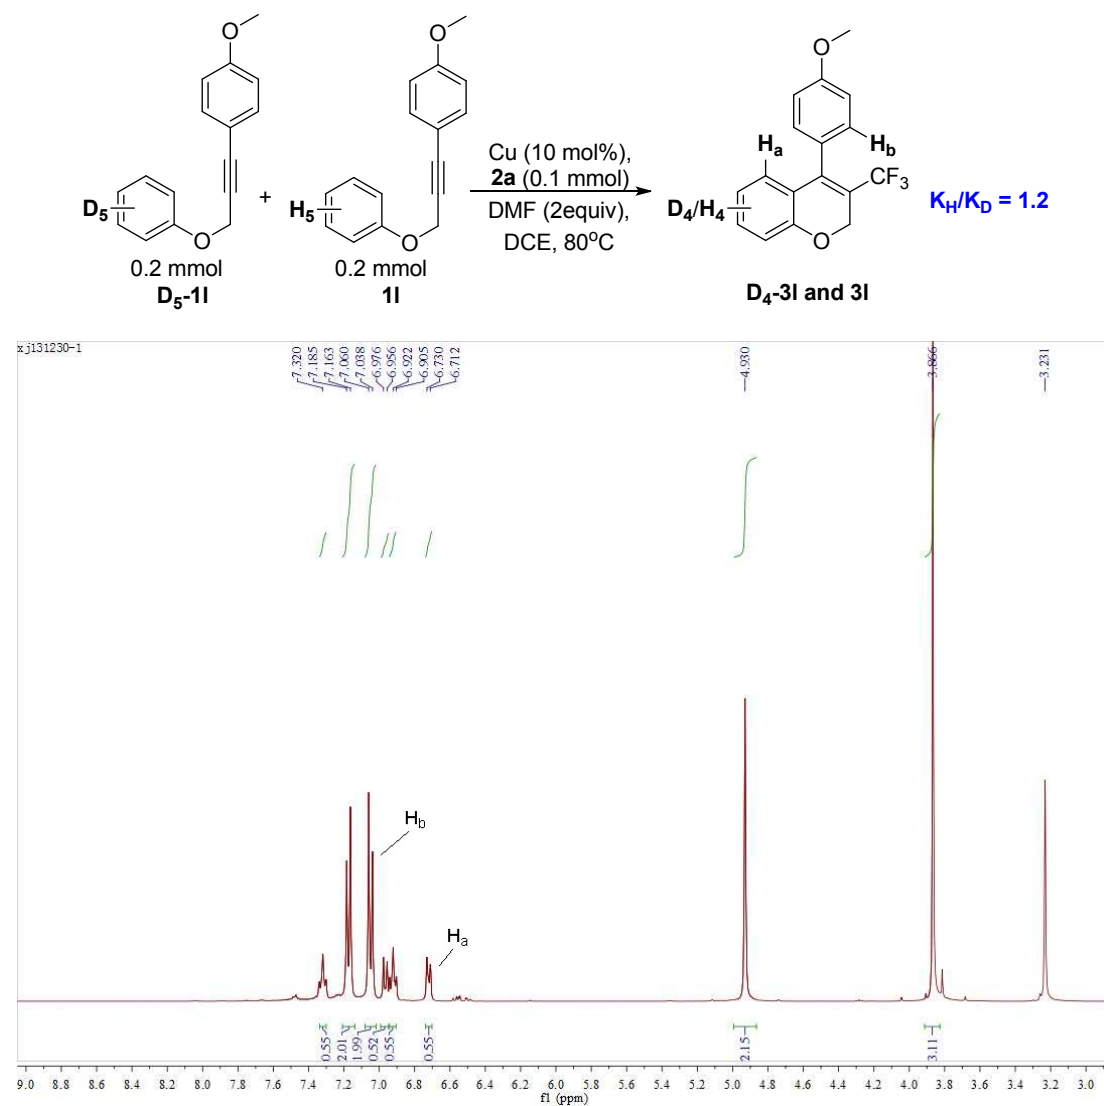

According to above mechanism investigations, a catalytic cycle for copper-catalyzed oxidative trifluoromethylation of alkylboronic acids was given in **Scheme**



***S1:***

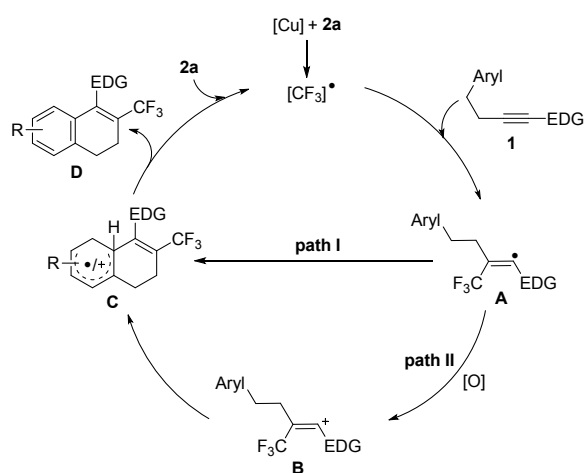

***Scheme S1***

## VI. X-ray Crystal data for product 3a

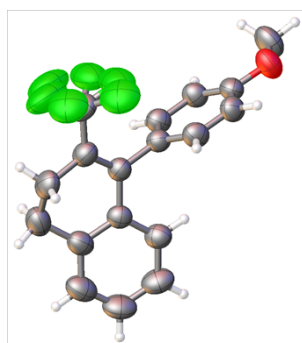

ORTEP diagrams and tables of crystallographic data for Complex **3a**.

**Table 1 Crystal data and structure refinement for 3a**

|                     |                                                  |
|---------------------|--------------------------------------------------|
| Identification code | xj131024-1                                       |
| Empirical formula   | C <sub>18</sub> H <sub>15</sub> F <sub>3</sub> O |
| Formula weight      | 304.30                                           |
| Temperature/K       | 290(2)                                           |
| Crystal system      | orthorhombic                                     |
| Space group         | Fdd2                                             |
| a/Å                 | 38.6451(16)                                      |
| b/Å                 | 18.5006(7)                                       |
| c/Å                 | 8.3788(3)                                        |
| α/°                 | 90.00                                            |
| β/°                 | 90.00                                            |

|                                               |                                                                  |
|-----------------------------------------------|------------------------------------------------------------------|
| $\gamma/^\circ$                               | 90.00                                                            |
| Volume/ $\text{\AA}^3$                        | 5990.5(4)                                                        |
| Z                                             | 16                                                               |
| $\rho_{\text{calc}}/\text{mg}/\text{mm}^3$    | 1.350                                                            |
| $\text{m}/\text{mm}^{-1}$                     | 0.915                                                            |
| F(000)                                        | 2528.0                                                           |
| Crystal size/ $\text{mm}^3$                   | $0.37 \times 0.31 \times 0.3$                                    |
| $2\Theta$ range for data collection           | 9.16 to $138.76^\circ$                                           |
| Index ranges                                  | $-42 \leq h \leq 45$ , $-18 \leq k \leq 22$ , $-9 \leq l \leq 7$ |
| Reflections collected                         | 3225                                                             |
| Independent reflections                       | 1929[R(int) = 0.0146]                                            |
| Data/restraints/parameters                    | 1929/37/211                                                      |
| Goodness-of-fit on $F^2$                      | 1.055                                                            |
| Final R indexes [ $I \geq 2\sigma(I)$ ]       | $R_1 = 0.0523$ , $wR_2 = 0.1488$                                 |
| Final R indexes [all data]                    | $R_1 = 0.0555$ , $wR_2 = 0.1535$                                 |
| Largest diff. peak/hole / $\text{e \AA}^{-3}$ | 0.27/-0.25                                                       |
| Flack parameter                               | ?                                                                |

**Table 2 Fractional Atomic Coordinates ( $\times 10^4$ ) and Equivalent Isotropic Displacement Parameters ( $\text{\AA}^2 \times 10^3$ ) for xj131024-1.  $U_{\text{eq}}$  is defined as 1/3 of the trace of the orthogonalised  $U_{ij}$  tensor.**

| Atom | x           | y          | z       | $U(\text{eq})$ |
|------|-------------|------------|---------|----------------|
| C16  | 9174.1(9)   | 920.9(18)  | 3007(6) | 64.1(10)       |
| C5   | 8358.5(8)   | 1593.3(17) | 3570(5) | 55.0(9)        |
| C12  | 9135.7(8)   | 2190.0(18) | 2531(5) | 58.7(9)        |
| O1   | 9865.0(7)   | 1408.5(15) | 303(4)  | 78.9(9)        |
| C15  | 9458.3(9)   | 881.0(18)  | 1994(5) | 63.8(10)       |
| C3   | 7735(1)     | 1699(2)    | 3722(7) | 81.5(13)       |
| C14  | 9581.0(8)   | 1502(2)    | 1260(5) | 59.2(9)        |
| C9   | 8717.9(10)  | 1678.5(19) | 5956(5) | 63.5(10)       |
| C11  | 9010.4(8)   | 1574.2(17) | 3297(4) | 53.8(8)        |
| C10  | 8700.8(8)   | 1619.8(18) | 4350(4) | 53.4(8)        |
| C1   | 8001.0(11)  | 1347(2)    | 1274(6) | 79.2(12)       |
| C4   | 8059.1(9)   | 1758.4(19) | 4450(6) | 64.8(10)       |
| C13  | 9419.0(8)   | 2152.6(18) | 1526(5) | 60.1(9)        |
| C2   | 7710.8(11)  | 1500(3)    | 2152(7) | 84.5(14)       |
| C17  | 9048.4(13)  | 1706(3)    | 6851(6) | 83.5(13)       |
| C18  | 10001.4(12) | 2043(2)    | -463(7) | 90.2(14)       |
| C6   | 8325.6(10)  | 1388(2)    | 1974(5) | 64.8(9)        |

|     |            |         |          |           |
|-----|------------|---------|----------|-----------|
| C8  | 8397.1(11) | 1695(3) | 6979(5)  | 76.6(12)  |
| C7  | 8096.4(11) | 2037(3) | 6105(6)  | 81.1(12)  |
| F3  | 9033.9(14) | 1305(4) | 8185(7)  | 118.5(17) |
| F1  | 9333.7(13) | 1534(5) | 6154(8)  | 122.6(18) |
| F2  | 9094.4(18) | 2362(4) | 7480(11) | 147(2)    |
| F1' | 9273(2)    | 2192(8) | 6244(14) | 122.6(18) |
| F3' | 9247(3)    | 1093(7) | 6546(14) | 118.5(17) |
| F2' | 9019(3)    | 1815(8) | 8320(20) | 147(2)    |

**Table 3 Anisotropic Displacement Parameters ( $\text{\AA}^2 \times 10^3$ ) for xj131024-1. The Anisotropic displacement factor exponent takes the form:  $-2\pi^2[h^2a^{*2}U_{11} + \dots + 2hka \times b \times U_{12}]$**

| Atom | $U_{11}$ | $U_{22}$ | $U_{33}$ | $U_{23}$ | $U_{13}$ | $U_{12}$ |
|------|----------|----------|----------|----------|----------|----------|
| C16  | 62.5(19) | 53.0(17) | 77(3)    | 2.0(18)  | 2.3(19)  | -4.5(14) |
| C5   | 54.7(18) | 50.7(16) | 60(2)    | 5.2(16)  | 0.1(16)  | -4.2(12) |
| C12  | 57.4(17) | 51.2(17) | 67(2)    | 1.1(17)  | -0.1(16) | -0.1(13) |
| O1   | 67.2(14) | 79.6(17) | 90(2)    | 2.2(16)  | 23.2(15) | 6.3(12)  |
| C15  | 60.8(19) | 54.5(18) | 76(3)    | -5.7(18) | 2.6(18)  | 3.8(14)  |
| C3   | 57(2)    | 77(2)    | 110(4)   | 7(3)     | -1(2)    | 6.1(17)  |
| C14  | 48.1(15) | 68(2)    | 62(2)    | -6.6(18) | -0.5(16) | -0.5(14) |
| C9   | 67(2)    | 67(2)    | 57(3)    | -4.0(18) | -1.1(17) | -8.5(16) |
| C11  | 51.1(16) | 54.9(17) | 55(2)    | -0.6(15) | -1.3(15) | -3.9(13) |
| C10  | 54.5(18) | 54.2(18) | 51(2)    | 1.0(15)  | 3.8(15)  | -5.2(13) |
| C1   | 81(3)    | 84(3)    | 72(3)    | 10(2)    | -26(2)   | -8(2)    |
| C4   | 54.4(17) | 57.0(18) | 83(3)    | 0.1(19)  | 3.7(17)  | -0.6(15) |
| C13  | 57.7(17) | 56.8(17) | 66(2)    | 5.1(17)  | 6.2(17)  | -4.4(14) |
| C2   | 61(2)    | 93(3)    | 99(4)    | 14(3)    | -22(2)   | 3(2)     |
| C17  | 87(3)    | 109(4)   | 55(2)    | -6(2)    | -13(2)   | -6(3)    |
| C18  | 73(2)    | 98(3)    | 99(3)    | 7(3)     | 33(2)    | 1(2)     |
| C6   | 61.2(19) | 73(2)    | 60(2)    | 5.2(19)  | -2.8(17) | -3.7(16) |
| C8   | 85(3)    | 90(3)    | 54(2)    | -10(2)   | 12(2)    | -11(2)   |
| C7   | 76(2)    | 78(3)    | 88(3)    | -13(2)   | 21(2)    | -4(2)    |
| F3   | 123(3)   | 139(4)   | 93(3)    | 27(3)    | -35(3)   | 6(3)     |
| F1   | 76(2)    | 190(5)   | 102(3)   | -11(4)   | -21(2)   | -3(3)    |
| F2   | 147(4)   | 125(4)   | 169(5)   | -46(4)   | -65(4)   | -15(3)   |
| F1'  | 76(2)    | 190(5)   | 102(3)   | -11(4)   | -21(2)   | -3(3)    |
| F3'  | 123(3)   | 139(4)   | 93(3)    | 27(3)    | -35(3)   | 6(3)     |
| F2'  | 147(4)   | 125(4)   | 169(5)   | -46(4)   | -65(4)   | -15(3)   |

**Table 4 Bond Lengths for xj131024-1.**

Atom Atom Length/ $\text{\AA}$       Atom Atom Length/ $\text{\AA}$

|     |     |          |     |     |           |
|-----|-----|----------|-----|-----|-----------|
| C16 | C15 | 1.390(5) | C9  | C17 | 1.482(6)  |
| C16 | C11 | 1.386(5) | C9  | C8  | 1.508(5)  |
| C5  | C10 | 1.476(5) | C11 | C10 | 1.489(5)  |
| C5  | C4  | 1.406(5) | C1  | C2  | 1.371(7)  |
| C5  | C6  | 1.396(6) | C1  | C6  | 1.387(5)  |
| C12 | C11 | 1.395(5) | C4  | C7  | 1.486(7)  |
| C12 | C13 | 1.383(5) | C17 | F3  | 1.343(7)  |
| O1  | C14 | 1.370(4) | C17 | F1  | 1.288(8)  |
| O1  | C18 | 1.438(5) | C17 | F2  | 1.335(8)  |
| C15 | C14 | 1.387(5) | C17 | F1' | 1.351(13) |
| C3  | C4  | 1.397(6) | C17 | F3' | 1.393(13) |
| C3  | C2  | 1.369(7) | C17 | F2' | 1.252(16) |
| C14 | C13 | 1.374(5) | C8  | C7  | 1.512(7)  |
| C9  | C10 | 1.351(5) |     |     |           |

**Table 5 Bond Angles for xj131024-1.**

| Atom Atom Atom Angle/° |     |     |          | Atom Atom Atom Angle/° |     |     |          |
|------------------------|-----|-----|----------|------------------------|-----|-----|----------|
| C11                    | C16 | C15 | 121.0(3) | C3                     | C2  | C1  | 121.0(4) |
| C4                     | C5  | C10 | 119.9(4) | F3                     | C17 | C9  | 111.5(5) |
| C6                     | C5  | C10 | 121.0(3) | F3                     | C17 | F1' | 135.1(6) |
| C6                     | C5  | C4  | 119.1(3) | F3                     | C17 | F3' | 74.1(6)  |
| C13                    | C12 | C11 | 121.0(3) | F1                     | C17 | C9  | 120.0(5) |
| C14                    | O1  | C18 | 116.8(3) | F1                     | C17 | F3  | 106.1(6) |
| C14                    | C15 | C16 | 119.8(3) | F1                     | C17 | F2  | 106.9(6) |
| C2                     | C3  | C4  | 120.1(4) | F1                     | C17 | F1' | 56.1(6)  |
| O1                     | C14 | C15 | 115.4(3) | F1                     | C17 | F3' | 40.8(5)  |
| O1                     | C14 | C13 | 124.8(3) | F2                     | C17 | C9  | 110.2(5) |
| C13                    | C14 | C15 | 119.8(3) | F2                     | C17 | F3  | 100.3(6) |
| C10                    | C9  | C17 | 123.3(4) | F2                     | C17 | F1' | 57.1(6)  |
| C10                    | C9  | C8  | 121.8(4) | F2                     | C17 | F3' | 137.6(7) |
| C17                    | C9  | C8  | 114.8(4) | F1'                    | C17 | C9  | 112.8(6) |
| C16                    | C11 | C12 | 118.2(3) | F1'                    | C17 | F3' | 96.7(8)  |
| C16                    | C11 | C10 | 121.4(3) | F3'                    | C17 | C9  | 110.8(6) |
| C12                    | C11 | C10 | 120.4(3) | F2'                    | C17 | C9  | 115.2(8) |
| C5                     | C10 | C11 | 117.1(3) | F2'                    | C17 | F3  | 42.9(7)  |
| C9                     | C10 | C5  | 119.2(3) | F2'                    | C17 | F1  | 124.3(8) |
| C9                     | C10 | C11 | 123.7(3) | F2'                    | C17 | F2  | 58.5(8)  |
| C2                     | C1  | C6  | 120.1(5) | F2'                    | C17 | F1' | 108.7(9) |
| C5                     | C4  | C7  | 119.0(3) | F2'                    | C17 | F3' | 111.2(9) |
| C3                     | C4  | C5  | 119.4(4) | C1                     | C6  | C5  | 120.2(4) |

|     |     |     |          |    |    |    |          |
|-----|-----|-----|----------|----|----|----|----------|
| C3  | C4  | C7  | 121.4(4) | C9 | C8 | C7 | 111.4(4) |
| C14 | C13 | C12 | 120.2(3) | C4 | C7 | C8 | 112.4(3) |

**Table 6 Torsion Angles for xj131024-1.**

| A   | B   | C   | D   | Angle/°   | A   | B   | C   | D   | Angle/°   |
|-----|-----|-----|-----|-----------|-----|-----|-----|-----|-----------|
| C16 | C15 | C14 | O1  | 179.1(4)  | C4  | C5  | C10 | C11 | -169.0(3) |
| C16 | C15 | C14 | C13 | -0.6(6)   | C4  | C5  | C6  | C1  | -0.1(5)   |
| C16 | C11 | C10 | C5  | -94.9(4)  | C4  | C3  | C2  | C1  | 0.9(7)    |
| C16 | C11 | C10 | C9  | 84.7(5)   | C13 | C12 | C11 | C16 | -0.9(5)   |
| C5  | C4  | C7  | C8  | -35.9(5)  | C13 | C12 | C11 | C10 | -178.7(3) |
| C12 | C11 | C10 | C5  | 82.8(4)   | C2  | C3  | C4  | C5  | -1.8(6)   |
| C12 | C11 | C10 | C9  | -97.6(5)  | C2  | C3  | C4  | C7  | 174.4(4)  |
| O1  | C14 | C13 | C12 | -179.2(4) | C2  | C1  | C6  | C5  | -0.8(6)   |
| C15 | C16 | C11 | C12 | 0.8(6)    | C17 | C9  | C10 | C5  | 179.7(4)  |
| C15 | C16 | C11 | C10 | 178.6(4)  | C17 | C9  | C10 | C11 | 0.1(6)    |
| C15 | C14 | C13 | C12 | 0.5(6)    | C17 | C9  | C8  | C7  | 151.1(4)  |
| C3  | C4  | C7  | C8  | 147.9(4)  | C18 | O1  | C14 | C15 | -179.3(4) |
| C9  | C8  | C7  | C4  | 46.0(5)   | C18 | O1  | C14 | C13 | 0.3(6)    |
| C11 | C16 | C15 | C14 | 0.0(6)    | C6  | C5  | C10 | C9  | -166.9(4) |
| C11 | C12 | C13 | C14 | 0.3(6)    | C6  | C5  | C10 | C11 | 12.7(5)   |
| C10 | C5  | C4  | C3  | -177.0(3) | C6  | C5  | C4  | C3  | 1.4(5)    |
| C10 | C5  | C4  | C7  | 6.8(5)    | C6  | C5  | C4  | C7  | -174.9(4) |
| C10 | C5  | C6  | C1  | 178.2(3)  | C6  | C1  | C2  | C3  | 0.4(7)    |
| C10 | C9  | C17 | F3  | -138.3(5) | C8  | C9  | C10 | C5  | 1.9(6)    |
| C10 | C9  | C17 | F1  | -13.5(9)  | C8  | C9  | C10 | C11 | -177.7(3) |
| C10 | C9  | C17 | F2  | 111.1(6)  | C8  | C9  | C17 | F3  | 39.6(7)   |
| C10 | C9  | C17 | F1' | 49.3(9)   | C8  | C9  | C17 | F1  | 164.4(6)  |
| C10 | C9  | C17 | F3' | -57.8(8)  | C8  | C9  | C17 | F2  | -70.9(7)  |
| C10 | C9  | C17 | F2' | 174.9(9)  | C8  | C9  | C17 | F1' | -132.7(8) |
| C10 | C9  | C8  | C7  | -30.9(6)  | C8  | C9  | C17 | F3' | 120.1(7)  |
| C4  | C5  | C10 | C9  | 11.4(5)   | C8  | C9  | C17 | F2' | -7.2(11)  |

**Table 7 Hydrogen Atom Coordinates ( $\text{\AA} \times 10^4$ ) and Isotropic Displacement Parameters ( $\text{\AA}^2 \times 10^3$ ) for xj131024-1.**

| Atom | x    | y    | z    | U(eq) |
|------|------|------|------|-------|
| H16  | 9093 | 503  | 3496 | 77    |
| H12  | 9027 | 2632 | 2698 | 70    |
| H15  | 9566 | 439  | 1810 | 77    |
| H3   | 7535 | 1794 | 4305 | 98    |
| H1   | 7980 | 1216 | 207  | 95    |
| H13  | 9500 | 2569 | 1028 | 72    |

|      |       |      |       |     |
|------|-------|------|-------|-----|
| H2   | 7494  | 1469 | 1674  | 101 |
| H18A | 9838  | 2216 | -1237 | 135 |
| H18C | 10215 | 1925 | -986  | 135 |
| H18B | 10042 | 2411 | 322   | 135 |
| H6   | 8522  | 1278 | 1378  | 78  |
| H8B  | 8444  | 1967 | 7945  | 92  |
| H8A  | 8336  | 1206 | 7285  | 92  |
| H7A  | 7885  | 1942 | 6691  | 97  |
| H7B  | 8130  | 2556 | 6070  | 97  |

### Reference:

- [1] A. J. Walkinshaw, W. Xu, M. G. Suero, M. J. Gaunt, *J. Am. Chem. Soc.* **2013**, *135*, 12532.
- [2] Itami, K. *Pure Appl. Chem.* **2012**, *84*, 907.
- [3] Mitchell J. M., Finney N. S. *J. Am. Chem. Soc.* **2001**, *123*, 862.
- [4] D. L. J. Clive, J. Wang, *Angew. Chem. Int. Ed.* **2003**, *42*, 3406.
- [5] a) M. Ye, G.-L. Gao, A. J. F. Edmunds, P. A. Worthington, J. A. Morris, J.-Q. Yu, *J. Am. Chem. Soc.* **2011**, *133*, 19090. b) B. Xiao, T.-J. Gong, Z.-J. Liu, J.-H. Liu, D.-F. Luo, J. Xu, L. Liu, *J. Am. Chem. Soc.* **2011**, *133*, 9250; b) B. Xiao, Z.-J. Liu, L. Liu, Y. Fu, *J. Am. Chem. Soc.*, **2013**, *135*, 616.
